# Supplementary material for: Social deprivation, gender and obesity: multiple stigma? Results of a population survey from Germany
Source: PubMed Central journal article supplement — BMJ Open. 2019 Apr 3;9(4):e023389. doi: 10.1136/bmjopen-2018-023389 (PMC6500240; doi:10.1136/bmjopen-2018-023389), 2019-04-03
Supplement: bmjopen-2018-023389.draft_revisions.pdf [file bmjopen-2018-023389.draft_revisions.pdf]

# BMJ Open

BMJ Open is committed to open peer review. As part of this commitment we make the peer review history of every article we publish publicly available.

When an article is published we post the peer reviewers' comments and the authors' responses online. We also post the versions of the paper that were used during peer review. These are the versions that the peer review comments apply to.

The versions of the paper that follow are the versions that were submitted during the peer review process. They are not the versions of record or the final published versions. They should not be cited or distributed as the published version of this manuscript.

BMJ Open is an open access journal and the full, final, typeset and author-corrected version of record of the manuscript is available on our site with no access controls, subscription charges or pay-per-view fees (<http://bmjopen.bmj.com>).

If you have any questions on BMJ Open's open peer review process please email [info.bmjopen@bmj.com](mailto:info.bmjopen@bmj.com)

# BMJ Open

## Social deprivation, gender, and obesity: multiple stigma? Results of a population survey from Germany

|                               |                                                                                                                                                                                                                                                                                                                                                                                                                                                                |
|-------------------------------|----------------------------------------------------------------------------------------------------------------------------------------------------------------------------------------------------------------------------------------------------------------------------------------------------------------------------------------------------------------------------------------------------------------------------------------------------------------|
| Journal:                      | <i>BMJ Open</i>                                                                                                                                                                                                                                                                                                                                                                                                                                                |
| Manuscript ID                 | bmjopen-2018-023389                                                                                                                                                                                                                                                                                                                                                                                                                                            |
| Article Type:                 | Research                                                                                                                                                                                                                                                                                                                                                                                                                                                       |
| Date Submitted by the Author: | 04-Apr-2018                                                                                                                                                                                                                                                                                                                                                                                                                                                    |
| Complete List of Authors:     | Makowski, Anna; University Medical Center Hamburg-Eppendorf, Department of Medical Sociology<br>Kim, Tae; University Medical Center Hamburg-Eppendorf, Department of Medical Sociology<br>Luck-Sikorski, Claudia; SRH University of Applied Health Sciences; University of Leipzig, Integrated Research and Treatment Center (IFB) Adiposity Diseases<br>von dem Knesebeck, Olaf; University Medical Center Hamburg-Eppendorf, Department of Medical Sociology |
| Keywords:                     | multiple stigma, obesity, Germany, differences, socioeconomic status, gender                                                                                                                                                                                                                                                                                                                                                                                   |
|                               |                                                                                                                                                                                                                                                                                                                                                                                                                                                                |

SCHOLARONE™  
Manuscripts

# **Social deprivation, gender, and obesity: multiple stigma? Results of a population survey from Germany**

Anna C. Makowski<sup>\*1</sup>, Tae Jun Kim<sup>1</sup>, Claudia Luck-Sikorski<sup>2,3</sup>, Olaf von dem Knesebeck<sup>1</sup>

<sup>1</sup>*Department of Medical Sociology, University Medical Center Hamburg-Eppendorf, Martinistrasse 52, 20146 Hamburg, Germany*

<sup>2</sup>*Integrated Research and Treatment Center (IFB) Adiposity Diseases, University of Leipzig, Philipp-Rosenthal-Str. 27, 04103 Leipzig, Germany*

<sup>3</sup>*SRH University of Applied Health Sciences, Neue Str. 28-30, 07548 Gera, Germany*

E-mail: a.makowski@uke.de

\*Corresponding author

Word count: 3,702

## Social deprivation, gender, and obesity: multiple stigma? Results of a population survey from Germany

**Objectives:** Individuals with obesity are subject to stigmatization, resulting in discrimination. There are studies focusing on obesity stigma in the German public. Nevertheless, these often do not account for social conditions that also may be associated with stigmatization. Following an intersectional approach, social categories such as gender and socio-economic position (SES) can interact and form a basis for multiple stigma within the context of obesity. The present study analyses differences in public obesity stigma depending on gender and SES, as well as possible interdependencies between these social categories.

**Design:** Representative cross-sectional telephone survey.

**Participants:** 692 randomly selected adults ( $\geq 18$  years of age) in Germany.

**Methods:** Different vignettes were presented, depicting a lawyer (male/female) or a janitor/cleaner (male/female) with obesity. Following the vignette, different components of stigma were assessed: (1) fat phobia (stereotypes), (2) emotional reactions to an obese person, and (3) desire for social distance. Associations between gender, SES, and stigma components were tested in multiple linear regression analyses.

**Results:** A low SES in the obesity vignette (janitor/cleaner) was significantly associated with higher fat phobia scores as well as desire for social distance, compared to the vignette with an obese person with a high SES (lawyer). Being a male with obesity was significantly associated with more pronounced negative emotional reactions and greater desire for social distance. There were no significant interaction effects between gender and SES.

**Conclusions:** Although no interaction effects of gender and SES became apparent in the sample under study, to a certain extent the results do support the hypothesis of multiple stigma. Being male or of low SES was significantly associated with more pronounced negative attitudes in the German public. Following the concept of intersectionality, we assume that obesity stigma can exacerbate pre-existing inequalities. This needs to be considered in development and implementation of prevention and anti-stigma measures.

**Keywords:** stigma; multiple stigma; attitudes; obesity; Germany; differences; socioeconomic status; occupational position; gender

## STRENGTHS AND LIMITATIONS OF THIS STUDY

- This is the first study addressing social deprivation and gender in the context of public obesity stigma.
- Analyses are based on a national telephone survey not only relying on landline but also incorporating mobile-only users all over Germany.
- Vignette manipulation was used to identify additive stigma effects. If we were to separate obesity stigma from the stigma of different social categories, a neutral control vignette would have been necessary.
- Vignettes are a frequently used method in stigma research, however, they need to be short and bear the risk of not conveying a holistic picture of an individual of different social categories with obesity.

## INTRODUCTION

The share of people who are overweight or obese has increased continuously over the past decades.[1] In Germany, the current Health Interview and Examination Survey for Adults reports a prevalence rate of obesity (defined as Body Mass Index (BMI)  $\geq 30\text{kg/m}^2$ ) of approximately 24%.[2] The etiology of obesity is often multi-faceted, different factors such as behavioral, biological, psychosocial, context-related or prenatal conditions concur.[3] However, poor diet and sedentary behavior are often erroneously seen as the primary reason for overweight.[4] This in turn lays the focus on individual responsibility and fosters public stereotypes of laziness and weak will. According to attribution theory, believing the condition to be under a person's control determines greater stigmatizing reactions.[5] The public misconception of causes of overweight and obesity is common and contributes to the expression of weight stigma.[6] In excess body weight, individuals with overweight or obesity display a physical 'mark' that sets them apart from others. Link and Phelan [7] have provided a process model, in which stigma is conceptualized as several distinct, but interrelated steps: differences between social groups are distinguished and *labeled*. These labels are linked to *stereotypes* (undesired characteristics) that form the basis of a *separation* of 'us' and 'them'. Thusly-labeled individuals experience *status loss* and *discrimination* in a context in which power is exercised.

There is a public recognition of obesity as a chronic condition and it is a classified disease in some countries (but not Germany).[8] Nevertheless, obese individuals experience discrimination in daily life, which in turn reinforces negative stereotypes, again nourishing stigmatizing processes.[7] Ascribing negative attributes such as unintelligent, lack of self-discipline or emotionally instable [9,10] to persons who are obese, activates processes that result in discrimination in different settings. This could be shown for the education and employment sector as well as personal relationships.[10] Furthermore, stigmatizing attitudes and discrimination are present in the health care sector, possibly leading to the avoidance of necessary treatment out of fear of stigmatization.[11] The adverse health consequences of weight bias have been shown on psychological (e.g. depression, self-esteem) and physical (eating behavior, physical activity, cardiovascular health outcomes) level.[10] Moreover, the stigma adherent to obesity can impede prevention efforts.[6]

For Germany, a study found that about one fourth of the general public displays definite stigmatizing attitudes regarding the 'Weight Control/Blame' subscale from the Antifat Attitudes Test.[12] Moreover, high levels of responsibility for becoming obese are attributed

1  
2  
3 to the individual, which is associated with the belief that this individual should be liable for  
4 treatment costs to a great extent.[13] Sikorski et al. examined emotional reactions and social  
5 distance towards individuals with obesity and found that the most rejected domains  
6 represented personal ability as well as social interaction.[14]  
7  
8

9  
10 Beyond the prevalent public stigma of obesity, research has identified gender differences in  
11 weight stigma. Studies reported higher weight bias internalization [15] and greater risk for  
12 weight/height discrimination [16] among women. In children and adolescents, girls with  
13 overweight have been found to be subject to teasing and social marginalization.[17,18]  
14 Similar results are also presented by Fikkan and Rothblum,[19] who found women with  
15 obesity to be more stigmatized in education and employment sectors than men. However,  
16 gender differences in weight-based stigmatization are only scarcely researched, and results are  
17 not consistent. One study found evidence that men stigmatize and are being stigmatized  
18 because of overweight just as women are.[20]  
19  
20

21  
22 Over the past years, stigma research has paid increased attention to multiple social identities  
23 and their interaction to influence stigmatization. This intersectional approach allows  
24 examining how multiple social categories, e.g. being categorized as ‘female’, ‘black’ or both,  
25 interact to produce or protect against health risks or discrimination.[15] A similar approach is  
26 referred to as ‘multiple stigma’ [21] or ‘double disadvantage’.[22] These concepts suggest  
27 that a person can belong to different, possibly stigmatized social groups which exerts additive  
28 or cumulative effects.[23] When it comes to weight stigma at the intersection of gender and  
29 race, the few studies have come to different results. While Himmelstein et al. [15] examined  
30 no divergences in stigma as a function of race or gender, Puhl et al. found that African  
31 American females who are obese evoked higher ratings of dislike and social distance than  
32 Caucasian obese females. However, there were no differences in ratings for male and female  
33 targets.[24]  
34  
35

36  
37 So far, there is no study focusing on possible additive or multiple effects of gender and levels  
38 of socio-economic position (SES) in the context of obesity stigma. This is astonishing, as  
39 there are inequalities in how obesity is distributed among the population in countries with a  
40 Western lifestyle.[25] This also holds true for Germany, where obesity is more common  
41 among children and adults who are of low SES. Moreover, especially women in this group  
42 appear to be excessively affected by obesity.[26]  
43  
44  
45  
46  
47  
48  
49  
50  
51  
52  
53  
54  
55  
56  
57  
58  
59  
60

1  
2  
3 Against this background, we analyze differences in public stigma towards low vs. high SES  
4 persons with obesity and female vs. male persons with obesity. Moreover, by incorporating  
5 the interaction of gender x SES, we examine possible interdependencies and their associations  
6 with public obesity stigma.  
7  
8

## 9 10 **METHODS**

### 11 **Study design and sample**

12  
13 Analyses are based on a national telephone survey (computer assisted telephone interview  
14 (CATI)), conducted between March and April 2017. The sampling was based on data of the  
15 Association of German Market and Social Research (ADM), which includes registered as  
16 well as non-registered telephone numbers via random digital dialing. Around 13% of adults  
17 (age 16 years and older) in Germany do not have access to landline and solely use a mobile  
18 phone.[27] This is why we incorporated a share of 30% mobile numbers in the initial sample.  
19 To ensure a sample representative of the German population, all regions in Germany were  
20 included.  
21  
22

23  
24 Regarding mobile numbers, target persons were owner or main user of the mobile phone. The  
25 connection was considered a neutral drop-out if the respondent was younger than 18 years. In  
26 households that were contacted via landline, the Kish-Selection-Grid [28] was applied to  
27 randomly select a person from this household. In the beginning of the interview, respondents  
28 were informed that the survey's focus was on nutrition, health, and wellbeing.  
29  
30

31  
32 The overall sample of this study were N=1,401 persons. To obtain this number, 2,849 people  
33 were randomly selected. Of these, n=862 (30.25%) refused to participate in the interview.  
34 Further n=586 (20.57%) could not be reached. This led to a total response rate of 49.18%.  
35 Previous telephone interview studies have reached similar rates [29,30] and the response can  
36 be regarded satisfactory for telephone surveys in Germany.[31] The study made use of the  
37 experimental manipulation of different vignettes. In present analyses, those vignettes  
38 depicting a lawyer (male/female) or a janitor/cleaner (male/female) with obesity were used,  
39 resulting in a subsample of n=692 under study.  
40  
41

42  
43 The Ethics Commission of the Medical Association in Hamburg approved this study (No.  
44 PV5421). Since the interviews were telephone-based, the respondents were verbally informed  
45 about the study and asked for consent to participate. Participants' consent and refusal were  
46 documented.  
47  
48  
49  
50  
51  
52  
53  
54  
55  
56  
57  
58  
59  
60



## Instruments

### *Vignette manipulation*

Vignettes have been frequently applied in the social sciences to investigate attitudes or intended behavior.[32] In stigma research, they have been used to convey realistic pictures of an individual, e.g. with depression, schizophrenia, or obesity.[33,34]

In the present study, all vignettes conveyed the same information, while two characteristics were varied: sex (female/male) and occupational position (low, cleaner/high, lawyer). This resulted in four different vignettes that described an obese individual (please see appendix for vignettes). Weight and height were stated, yielding a BMI of approximately 32 kg/m<sup>2</sup>. This was further emphasized by the comment that the person 'is strongly overweight'. A trained speaker audio-recorded the case stories. To neutralize possible interviewer effects, the files were directly played to the respondents from the computer via telephone line. Preceding the presentation of the vignette there was a set of questions related to respondents' own experience with overweight. This was weight and height, if the respondent has ever been overweight, tried to lose weight or has personal contact to persons with obesity. Following the vignette, four blocks of vignette-related questions were posed.

### *Public obesity stigma*

To assess stigmatizing attitudes, the short form of the Fat Phobia Scale (FPS) by Bacon et al. [35] was used. It is comprised of 14 items and constitutes the first factor of the original 50-item scale.[36] The short version demonstrated excellent reliability and was strongly correlated with the long form. Moreover, the 14-item-scale accounted for the largest amount of variance in factor analysis.[35] On a 5-point semantic differential scale, 14 pairs of adjectives are introduced that capture common beliefs about people who are obese. The FPS short form has been translated and applied in the German-speaking area by Luck-Sikorski et al.[34] Principal component analysis with varimax rotation yielded a 4-factorial solution, with the eigenvalue of the fourth factor barely exceeding 1. Similar to a validation study for the German short version of the FPS, the first factor explained the greatest share of variation (25.58%) (second factor 10.80%, third factor 8.19%, fourth factor 7.31%) which is why a one factorial solution is supported.[37] According to Bacon et al. [35] items were inverted where necessary, so that higher scores indicate greater fat phobia. By adding up scores, a sum score of FPS was obtained (ranging from 14 to 70). Dividing this by the number of items led to a mean FPS score ranging from 1 to 5, where values < 2.5 indicate positive attitudes and values

1  
2  
3  $\geq 2.5$  represent negative attitudes toward a person with obesity.[38] Cronbach's  $\alpha$  for the FPS  
4 was 0.77.  
5

6 Emotional reactions were assessed by nine items representing different ways of emotionally  
7 responding to the person described in the vignette. Six items were derived from a scale used  
8 in studies on mental illness stigma,[39] while three items were developed based on common  
9 stereotypes of obesity. The items were coded from 1 'completely disagree' to 4 'completely  
10 agree'. A principal component analysis with varimax rotation yielded two different factors.  
11 The first factor, termed negative emotional reactions, was comprised of the six items 'I react  
12 angrily', 'I feel annoyed', 'This triggers incomprehension with me', 'I feel repelled', 'I feel  
13 disgust', and 'I think this is unaesthetic'. The items "I feel pity", "I feel sympathy", and "I  
14 want to help" loaded on the second factor of positive emotional reactions. Together, the two  
15 factors accounted for 50.9 % of variance. Two sum scores were computed, Cronbach's  $\alpha$  was  
16 0.78 for negative (6 items), and 0.47 for positive emotional reactions (3 items).  
17  
18  
19  
20  
21  
22  
23  
24

25 Desire for social distance was assessed by a scale developed by Link et al.,[40] a modified  
26 version of the Bogardus Social Distance Scale.[41] The instrument contains seven items that  
27 represent different social relationships (e.g. neighbor, colleague, or child-carer). On a 4-point  
28 Likert-scale, respondents were asked to indicate to what extent they would accept the person  
29 described in the vignette. A principal component analysis with varimax rotation was carried  
30 out; yielding a single factor that explained 55.1 % of variance. Cronbach's  $\alpha$  was 0.86. Again,  
31 a sum score was computed, with higher scores indicating greater desire for social distance.  
32  
33  
34  
35  
36

### 37 **Statistical analyses**

38 The analyses were performed using SPSS 22.[42] To test for significant mean differences  
39 between groups regarding single items and scales, Mann-Whitney-U tests were applied.  
40 Determinants of stigmatizing attitudes were introduced to regression models. We analyzed  
41 two main effects presented in the vignette: occupational position (cleaner/lawyer) and gender  
42 (female/male). To take into account possible interdependencies, the interaction effect of  
43 occupational position x gender was also introduced to the models. Moreover, all models were  
44 controlled for respondents' characteristics. Age and BMI were entered as continuous  
45 variables. The respondents' occupational position was expressed in skill levels according to  
46 the International Standard Classification of Occupation (ISCO-08).[43] Other variables were  
47 the respondents' sex and personal contact to individuals who are obese.  
48  
49  
50  
51  
52  
53  
54  
55  
56  
57  
58  
59  
60

In all analyses, the response options ‘prefer not to say’ and ‘don’t know’ were treated as missing values. Exact p values are reported, values of  $p < 0.05$  were regarded as statistically significant.

## RESULTS

Sociodemographic characteristics of the analyzed sample are briefly presented in table 1. The sex ratio is relatively even, and almost half of the respondents work in occupational positions that are regarded skill level 2 when referring to ISCO.[43] Regarding weight status, more than 50% of the respondents are either overweight or obese. The share of those who are overweight/obese corresponds to numbers obtained by other representative studies in Germany.[2] The vast majority has personal contact to someone who is overweight.

**Table 1** Sociodemographic characteristics and weight status of the sample (n=627-692)

|                                                                            |             |
|----------------------------------------------------------------------------|-------------|
| <b>Gender</b> (female)                                                     | 48.9%       |
| <b>Mean age</b> (standard deviation)                                       | 50.9 (18.0) |
| <b>Age groups</b>                                                          |             |
| 18 - ≤ 24 years                                                            | 8.1%        |
| 25 - ≤ 39 years                                                            | 20.0%       |
| 40 - ≤ 59 years                                                            | 35.1%       |
| 60 - ≤ 64 years                                                            | 12.6%       |
| ≥ 65 years                                                                 | 24.2%       |
| <b>Occupational position</b> (ISCO-08)                                     |             |
| Skill level 1: <i>Simple/routine physical or manual tasks</i>              | 7.0%        |
| Skill level 2: <i>Operating machinery and electronic equipment</i>         | 45.5%       |
| Skill level 3: <i>Complex technical and practical tasks</i>                | 27.1%       |
| Skill level 4: <i>Complex problem-solving, decision-making, creativity</i> | 20.3%       |
| <b>Weight status according to BMI</b>                                      |             |
| <i>Underweight</i> (≤ 18.49)                                               | 2.1%        |
| <i>Normal weight</i> (18.50 – 24.99)                                       | 42.5%       |
| <i>Overweight</i> (25.00 – 29.99)                                          | 34.2%       |
| <i>Obese</i> (≥ 30.00)                                                     | 21.2%       |
| <b>Contact to someone who is overweight</b> (yes)                          | 84.4%       |

In tables 2-4, differences in the mean stigma values depending on occupational position and gender presented in the vignette are reported.

Regarding the fat phobia items, the adjectives insecure and low self-esteem were ascribed to the female vignette significantly more often (table 2). In contrast, lazy, slow, and self-indulgent were significantly more often attributed to the male vignette. Contrasting low and high occupational position, a homogenous picture emerged. A low occupational position was significantly associated with greater negative attitudes, expressing individual responsibility

1  
2  
3 (no willpower, poor self-control, weak) as well as insecurity and low self-esteem when  
4 compared to a high occupational position.  
5  
6  
7  
8  
9  
10  
11  
12  
13  
14  
15  
16  
17  
18  
19  
20  
21  
22  
23  
24  
25  
26  
27  
28  
29  
30  
31  
32  
33  
34  
35  
36  
37  
38  
39  
40  
41  
42  
43  
44  
45  
46  
47  
48  
49  
50  
51  
52  
53  
54  
55  
56  
57  
58  
59  
60

For peer review only

**Table 2** Fat phobia (FPS) single items and scale; differences according to gender and occupational position in the vignette (mean values (standard deviation))

| Pair of adjectives                                           | Gender      |             |        | Occupational position |             |        |
|--------------------------------------------------------------|-------------|-------------|--------|-----------------------|-------------|--------|
|                                                              | Female      | Male        | p*     | Low                   | High        | p*     |
| <i>Industrious ... lazy</i> <sup>1</sup>                     | 2.55 (0.92) | 2.83 (0.81) | <0.001 | 2.68 (0.87)           | 2.69 (0.89) | 0.667  |
| <i>Has willpower ... no willpower</i> <sup>1</sup>           | 3.28 (0.97) | 3.21 (1.04) | 0.602  | 3.48 (0.98)           | 3.03 (0.97) | <0.001 |
| <i>Attractive ... unattractive</i> <sup>1</sup>              | 3.33 (1.00) | 3.42 (0.94) | 0.160  | 3.43 (1.05)           | 3.32 (0.90) | 0.149  |
| <i>Good self-control ... poor self-control</i> <sup>1</sup>  | 3.10 (1.03) | 3.17 (0.98) | 0.440  | 3.30 (0.99)           | 2.97 (1.00) | <0.001 |
| <i>Fast ... slow</i> <sup>1</sup>                            | 3.25 (1.01) | 3.47 (0.99) | 0.002  | 3.32 (1.06)           | 3.39 (0.96) | 0.592  |
| <i>Having endurance ... having no endurance</i> <sup>1</sup> | 3.41 (1.13) | 3.37 (1.04) | 0.297  | 3.39 (1.10)           | 3.40 (1.07) | 0.688  |
| <i>Active ... inactive</i> <sup>1</sup>                      | 3.36 (0.98) | 3.38 (1.06) | 0.328  | 3.38 (1.06)           | 3.35 (0.97) | 0.650  |
| <i>Strong ... weak</i> <sup>1</sup>                          | 3.15 (0.99) | 3.18 (1.02) | 0.914  | 3.33 (1.03)           | 3.01 (0.94) | <0.001 |
| <i>Self-sacrificing ... self-indulgent</i> <sup>1</sup>      | 3.19 (0.91) | 3.41 (0.86) | <0.001 | 3.32 (0.90)           | 3.28 (0.89) | 0.375  |
| <i>Dislikes food ... likes food</i>                          | 4.05 (0.88) | 4.15 (0.90) | 0.093  | 4.08 (0.90)           | 4.12 (0.88) | 0.584  |
| <i>Shapely ... shapeless</i> <sup>1</sup>                    | 3.41 (1.15) | 3.21 (1.17) | 0.098  | 3.40 (1.16)           | 3.31 (1.17) | 0.753  |
| <i>Undereats ... overeats</i> <sup>1</sup>                   | 3.87 (0.91) | 3.95 (0.90) | 0.306  | 3.91 (0.93)           | 3.90 (0.89) | 0.883  |
| <i>Secure ... insecure</i> <sup>1</sup>                      | 3.01 (1.06) | 2.81 (1.03) | 0.027  | 3.24 (1.02)           | 2.61 (0.98) | <0.001 |
| <i>High self-esteem ... low self-esteem</i> <sup>1</sup>     | 3.10 (1.05) | 2.83 (1.05) | <0.001 | 3.28 (1.00)           | 2.67 (1.02) | <0.001 |
| <b>FPS</b> <sup>1</sup>                                      | 3.31 (0.48) | 3.32 (0.50) | 0.995  | 3.34 (0.51)           | 3.32 (0.46) | <0.001 |

<sup>1</sup>Semantic differential scales and mean FPS ranging from 1 to 5, values > 2.50 indicate greater fat phobia; \* Mann-Whitney-U test

Regarding emotional reactions (table 3), the comparison of gender in the vignette showed that males with obesity evoked significantly greater negative reactions on five out of six items as well as on the subscale for negative emotions. Females with obesity, in contrast, were met with a greater share of pity. In terms of occupational position, a cleaner/janitor evoked significantly greater feelings of anger and incomprehension than a lawyer did. However, respondents simultaneously expressed greater feelings of pity and the desire to help someone with a low occupational position.

**Table 3** Emotional reactions single items and scales; differences according to gender and occupational position in the vignette (mean values (standard deviation))

|                                                 | Gender      |              |                  | Occupational position |             |              |
|-------------------------------------------------|-------------|--------------|------------------|-----------------------|-------------|--------------|
|                                                 | Female      | Male         | p*               | Low                   | High        | p*           |
| <i>Annoyed</i> <sup>1</sup>                     | 1.56 (0.72) | 1.59 (0.70)  | 0.290            | 1.65 (0.79)           | 1.50 (0.62) | 0.056        |
| <i>Angry</i> <sup>1</sup>                       | 1.36 (0.64) | 1.55 (0.71)  | <b>&lt;0.001</b> | 1.52 (0.71)           | 1.38 (0.64) | <b>0.005</b> |
| <i>Incomprehension</i> <sup>1</sup>             | 1.88 (0.89) | 2.04 (0.83)  | <b>0.006</b>     | 2.05 (0.87)           | 1.87 (0.85) | <b>0.012</b> |
| <i>Revolted</i> <sup>1</sup>                    | 1.46 (0.69) | 1.67 (0.75)  | <b>&lt;0.001</b> | 1.62 (0.78)           | 1.50 (0.67) | 0.114        |
| <i>Disgust</i> <sup>1</sup>                     | 1.41 (0.66) | 1.53 (0.66)  | <b>0.002</b>     | 1.51 (0.69)           | 1.42 (0.94) | 0.078        |
| <i>Unaesthetic</i> <sup>1</sup>                 | 2.01 (0.94) | 2.15 (0.87)  | <b>0.022</b>     | 2.08 (0.87)           | 2.07 (0.95) | 0.919        |
| Negative emotional reactions scale <sup>2</sup> | 9.67 (3.06) | 10.54 (3.24) | <b>0.001</b>     | 10.43 (3.23)          | 9.74 (3.05) | <b>0.012</b> |
| <i>Sympathy</i> <sup>1</sup>                    | 2.58 (0.81) | 2.53 (0.78)  | 0.769            | 2.54 (0.82)           | 2.57 (0.77) | 0.884        |
| <i>Pity</i> <sup>1</sup>                        | 2.24 (0.94) | 2.09 (0.90)  | <b>0.020</b>     | 2.23 (0.92)           | 2.11 (0.92) | <b>0.034</b> |
| <i>Want to help</i> <sup>1</sup>                | 2.20 (0.93) | 2.26 (0.86)  | 0.414            | 2.34 (0.93)           | 2.12 (0.85) | <b>0.011</b> |
| Positive emotional reactions scale <sup>3</sup> | 6.97 (1.96) | 6.86 (1.74)  | 0.692            | 7.08 (2.01)           | 6.97 (1.96) | <b>0.004</b> |

<sup>1</sup>Single items ranging from 1 to 4; <sup>2</sup>Negative emotional reaction scales comprised of six items; sum scale ranging from 6 to 24; <sup>3</sup>Positive emotional reaction scale comprised of three items; sum scale ranging from 3 to 12; \*Mann-Whitney-U test

A consistent picture emerged when comparing desire for social distance according to the person's gender in the vignette (table 4). Males with obesity were met with significantly greater levels of rejection in all aspects of social distance. Only regarding the item 'neighbor', there were no significant differences between the sexes in the obesity vignette. Similarly, a person who is obese and of low occupational position evoked greater desire for social distance concerning four of six items.

**Table 4** Desire for social distance single items and scale; differences according to gender and occupational position in the vignette (mean values (standard deviation))

|                                       | Gender       |              |                  | Occupational position |              |                  |
|---------------------------------------|--------------|--------------|------------------|-----------------------|--------------|------------------|
|                                       | Female       | Male         | p*               | Low                   | High         | p*               |
| <i>Tenant</i> <sup>1</sup>            | 1.71 (0.92)  | 1.96 (0.86)  | <b>&lt;0.001</b> | 1.98 (0.98)           | 1.68 (0.78)  | <b>0.001</b>     |
| <i>Colleague</i> <sup>1</sup>         | 1.39 (0.57)  | 1.48 (0.61)  | <b>0.012</b>     | 1.43 (0.54)           | 1.42 (0.63)  | 0.546            |
| <i>Neighbor</i> <sup>1</sup>          | 1.52 (0.74)  | 1.56 (0.69)  | 0.155            | 1.54 (0.71)           | 1.54 (0.72)  | 0.649            |
| <i>Childcare</i> <sup>1</sup>         | 1.70 (0.75)  | 1.95 (0.91)  | <b>&lt;0.001</b> | 1.98 (0.90)           | 1.66 (0.74)  | <b>&lt;0.001</b> |
| <i>In-law</i> <sup>1</sup>            | 1.79 (0.90)  | 1.90 (0.79)  | <b>0.003</b>     | 1.98 (0.89)           | 1.71 (0.78)  | <b>&lt;0.001</b> |
| <i>Introduce friend</i> <sup>1</sup>  | 1.74 (0.82)  | 2.25 (0.95)  | <b>&lt;0.001</b> | 2.08 (0.92)           | 1.88 (0.90)  | <b>0.008</b>     |
| <i>Recommend for job</i> <sup>1</sup> | 1.83 (0.84)  | 2.04 (0.81)  | <b>&lt;0.001</b> | 2.03 (0.83)           | 1.83 (0.82)  | <b>0.011</b>     |
| Desire for social distance scale      | 11.66 (4.12) | 13.15 (4.00) | <b>&lt;0.001</b> | 13.03 (4.14)          | 11.72 (4.03) | <b>&lt;0.001</b> |

<sup>1</sup>Single items ranging from 1 to 4; <sup>2</sup>Desire for social distance scale comprised of 7 items, sum scale ranging from 7 to 28; \*Mann-Whitney-U test

1  
2  
3  
4  
5  
6  
7  
8  
9  
10  
11  
12  
13  
14  
15  
16  
17  
18  
19  
20  
21  
22  
23  
24  
25  
26  
27  
28  
29  
30  
31  
32  
33  
34  
35  
36  
37  
38  
39  
40  
41  
42  
43  
44  
45  
46  
47

**Table 5** Linear regression analyses: associations between stigma components and occupational position and gender presented in the vignette

|                                                               | FPS <sup>1</sup> |              |                        | Scale prosocial |        |                | Scale anger/disgust |               |                          | Social Distance |               |                          |
|---------------------------------------------------------------|------------------|--------------|------------------------|-----------------|--------|----------------|---------------------|---------------|--------------------------|-----------------|---------------|--------------------------|
|                                                               | B                | β            | 95% CI                 | B               | β      | 95% CI         | B                   | β             | 95% CI                   | B               | β             | 95% CI                   |
| <b>Low occupational position vignette</b> (ref. lawyer)       | <b>0.171</b>     | <b>0.173</b> | <b>0.052 - 0.287**</b> | 0.035           | 0.010  | -0.393 - 0.464 | 0.304               | 0.047         | -0.405 - 1.014           | <b>1.122</b>    | <b>0.135</b>  | <b>0.217 - 2.026*</b>    |
| <b>Female gender in vignette</b> (ref. male)                  | -0.002           | -0.002       | -0.115 - 0.112         | -0.146          | -0.039 | -0.556 - 0.264 | <b>-0.977</b>       | <b>-0.151</b> | <b>-1.655 - -0.299**</b> | <b>-1.201</b>   | <b>-0.145</b> | <b>-2.068 - -0.334**</b> |
| <b>Interaction gender * occupational position in vignette</b> | -0.021           | -0.019       | -0.182 - 0.139         | 0.539           | 0.126  | -0.048 - 1.125 | 0.238               | 0.032         | -0.730 - 1.205           | -0.215          | -0.023        | -1.451 - 1.021           |

\*p<0.05; \*\*p<0.01; \*\*\*p<0.001; <sup>1</sup>mean Fat Phobia Score ranging from 1 to 5; the model is adjusted for respondents' gender, age, BMI, occupational position as well as contact to an individual with obesity

1  
2  
3 The results of multiple linear regression analyses are reported in table 5. While controlling for  
4 respondents' characteristics, a significant main effect of occupational position emerged  
5 regarding fat phobia. Being a janitor or cleaner with obesity was associated with significantly  
6 increased fat phobia compared to lawyers. Regarding positive emotional reactions, there were  
7 no significant associations with either gender or occupational position. However, male obese  
8 were confronted with more negative emotions than female obese. In terms of desire for social  
9 distance, both main effects attained statistical significance. Being either a male or a  
10 janitor/cleaner with obesity was significantly associated with greater desire for social  
11 distance. In none of the models did the interaction effect of gender x occupational position  
12 attain statistical significance (table 5).  
13  
14  
15  
16  
17  
18

## 19 **DISCUSSION**

20  
21 The concept of multiple stigma suggests that a person can belong to different potentially  
22 stigmatized groups, experiencing an aggregation of disadvantages and discrimination.[23]  
23 Applying this approach to the present study, this would mean that because of their group  
24 affiliation (e.g. being female and of low SES) individuals suffer multiple stigma when  
25 confronted with the burden of obesity. Similarly, the framework of intersectionality describes  
26 the interdependent relationship between different social identities and structural  
27 inequities.[44] Multiple social categories interact and produce or protect against  
28 discrimination. In light of this, obesity stigma can reinforce pre-existing inequalities because  
29 of socio-economic position and / or gender.  
30  
31  
32  
33  
34  
35  
36

37 The present study is one of the first to analyze the possible multiple stigma of gender, SES,  
38 and obesity. Following an intersectional approach, it was analyzed whether main effects or  
39 the interaction of social categories possibly reinforce obesity stigma, implying a double or  
40 multiple disadvantage for certain individuals. While there were no statistically significant  
41 interaction effects of categories, we found distinct differences in public obesity stigma  
42 dependent on gender with regard to most stigma components under study. Males with obesity  
43 were met with greater fat phobia and negative emotional reactions and tended to be more  
44 rejected in terms of social distance. This contradicts previous studies that found (young)  
45 women who are overweight or obese to be met with greater stigmatization than men.[15–19]  
46 However, these results can aid in shedding light on a research gap that has recently come into  
47 focus again. Although Harris et al. [45] were able to show that stereotypes of obesity can be  
48 as severe for men as for women already in 1982, females have often been the center of  
49 attention in obesity stigma research. The predominance of overly thin women in the media  
50  
51  
52  
53  
54  
55  
56  
57  
58  
59  
60



1  
2  
3 and the promotion of a slim beauty ideal for females can have different effects on the  
4 stigmatization of women and men with obesity.[20] Nevertheless, over the past years, a trim  
5 and muscular male body image has come to the fore in most Western societies, shaping a new  
6 perspective on body image dissatisfaction and obesity stigma also among men.[46,47] Men  
7 have been found to be similarly stigmatized as women for being heavy,[20] and the concern  
8 about body image is associated with increased eating pathology in both men and women. [48]

9  
10  
11  
12 Regarding SES and obesity, the study revealed differences in public attitudes in all stigma  
13 components under study. Those of low SES were rated less favorably with regard to fat  
14 phobia, negative emotional reactions, and desire for social distance when compared to persons  
15 with high SES. In contrast to differences depending on gender, individuals with low SES were  
16 also met with significantly greater prosocial feelings. It is possible that, next to being obese,  
17 the status of a cleaner/janitor is linked to characteristics (e.g. economic hardship) that evoke  
18 pity among respondents. Nonetheless, there were no significant association between prosocial  
19 feelings of the respondents and SES in the vignette. Following the concept of  
20 intersectionality, and against the background of a disproportionate distribution of obesity  
21 (higher prevalence among females of low SES), one could have expected significant  
22 interaction effects in multivariate analyses. We were not able to verify this assumption.  
23 However, significant main effects of gender and SES indicate a double stigma to the  
24 disadvantage of males as well as individuals with low socio-economic position who suffer  
25 from obesity.  
26  
27  
28  
29  
30  
31  
32  
33  
34  
35

36 Some limitations need to be mentioned and discussed when evaluating our findings. More  
37 than half of the individuals eligible for the study were not available or refused to participate.  
38 Although participation rates around 50% can be regarded satisfactory for telephone  
39 surveys,[31] we cannot rule out selection bias due to non-response. With respect to internal  
40 consistency, Cronbach's  $\alpha$  for most scales was good or acceptable. Only the subscale of  
41 positive emotional reactions exhibited unacceptable reliability, which could be due to the  
42 relatively small number of items. In this case, it is recommended to use the mean inter-item  
43 correlation as an indicator for acceptability, which was 0.22 in the present sample. A  
44 satisfactory range is said to be 0.2 to 0.4.[49] Furthermore, no conclusions on causal  
45 relationships can be drawn as our data are based on a cross-sectional design. Similar to other  
46 studies in stigma research, we used vignettes to explore possible multiple stigma of obesity.  
47 On the one hand, these should not be too long. On the other hand, only varying one sentence  
48 to express different social conditions might have been too short to convey a holistic picture of  
49  
50  
51  
52  
53  
54  
55  
56  
57  
58  
59  
60

1  
2  
3 the individual, or to be kept in mind throughout the whole interview. Moreover, due to time  
4 constraints, every respondent only received one vignette. The lack of a neutral control  
5 condition impedes the interpretation of results, e.g. regarding fat phobia items and low socio-  
6 economic position. Therefore, it remains unclear whether respondents associate adjectives  
7 such as low self-esteem or insecurity with the fact that the individual in the vignette is obese  
8 or pursues the profession of a janitor when compared to a lawyer.  
9  
10

11  
12  
13 To our knowledge, this is the first population-based study examining the multiple stigma of  
14 gender, SES, and obesity. Differences in public stigma based on gender and SES indicate that  
15 obesity can exacerbate pre-existing inequalities. The presence of obesity stigma could be  
16 shown in many domains of daily life, e.g. education, work, personal, and health care.[10,11]  
17 Stigmatization due to excess body weight is a risk factor for physical and psychological health  
18 problems such as depression, body dissatisfaction, and low self-esteem. Moreover, instead of  
19 motivating individuals to lose weight, stigma is associated with additional weight gain [6] and  
20 underutilization of health care.[11] This implies a vicious circle of mutually reinforcing  
21 negative conditions. The manifold effects of weight-based stigma require actions in all kinds  
22 of professional disciplines, e.g. among physicians, dieticians, and scientists in various fields.  
23 To encounter stigma, the topic should be the subject of discussion in obesity intervention  
24 measures, and antistigma messages have to be incorporated into obesity prevention  
25 campaigns. Moreover, our results underline the need to consider the individual social  
26 dimension of obesity stigma. If affected by obesity, some individuals seem to suffer double.  
27 In acknowledging the interrelation of social conditions and existing structures, future research  
28 should derive tailored measures to encounter obesity stigma and its related adverse physical  
29 and psychological health outcomes.  
30  
31  
32  
33  
34  
35  
36  
37  
38  
39  
40  
41  
42  
43  
44  
45  
46  
47  
48  
49  
50  
51  
52  
53  
54  
55  
56  
57  
58  
59  
60

## DECLARATIONS

### *Ethical approval*

Ethics Commission of the Medical Association Hamburg approved the data collection procedure (No. PV5421).

### *Consent to participate*

Participants provided verbal informed consent.

### *Availability of data and material*

Data are available by request from the corresponding author.

### *Competing interests*

None declared.

### *Funding*

This study is part of the joint research project ‘Nutrition, Health and Modern Society: Germany and the USA’ and is funded by the Volkswagen Foundation.

### *Contributors*

ACM undertook the statistical analyses and wrote the first draft of the manuscript. OvdK conceived the study design and contributed to the manuscript. TJK and CLS contributed to the questionnaire and critically revised the manuscript.

### *Patient involvement*

No patients were involved in this study.

## REFERENCES

1. Ng M, Fleming T, Robinson M, et al. Global, regional and national prevalence of overweight and obesity in children and adults 1980-2013: A systematic analysis. *Lancet* 2014;384(9945):766-781.
2. Mensink GBM, Schienkiewitz A, Haftenberger M, et al. [Overweight and obesity in Germany: Results of the German Health Interview and Examination Survey for Adults (DEGS1)]. *Bundesgesundheitsblatt - Gesundheitsforsch - Gesundheitsschutz* 2013;56(5-6):786-794.
3. Varnaccia G, Zeiher J, Lange C, et al. [Factors influencing childhood obesity – the establishment of a population-wide monitoring system in Germany]. *J Heal Monit* 2017;2(2):85-97.
4. World Health Organization. The Challenge of Obesity in the WHO European Region and the Strategies for Response [Internet]. <http://content.wkhealth.com/linkback/openurl?sid=WKPTLP:landingpage&an=00005768-200803000-00031>. Last accessed January 9, 2018.
5. Weiner B, Perry RP, Magnusson J. An attributional analysis of reactions to stigmas. *J Pers Soc Psychol* 1988;55(5):738-48.
6. Puhl RM, Heuer CA. Obesity stigma: Important considerations for public health. *Am J Public Health* 2010;100(6):1019-1028.
7. Link BG, Phelan JC. Conceptualizing stigma. *Annu Rev Sociol* 2001;27:363-385.
8. World Health Organization. Obesity and overweight [Internet]. <http://www.who.int/mediacentre/factsheets/fs311/en/>. Last accessed January 9, 2018.
9. Puhl R, Brownell KD. Bias, discrimination, and obesity. *Obes Res* 2001;9(12):788-805.
10. Puhl RM, Heuer CA. The stigma of obesity: A review and update. *Obesity* 2009;17(5):941-964.
11. Sikorski C, Luppá M, Glaesmer H, et al. Attitudes of health care professionals towards female obese patients. *Obes Facts* 2013;6(6):512-522.
12. Hilbert A, Rief W, Braehler E. Stigmatizing attitudes toward obesity in a representative population-based sample. *Obesity* 2008;16(7):1529-1534.
13. Mata J, Hertwig R. Public beliefs about obesity relative to other major health risks: representative cross-sectional surveys in the USA, the UK, and Germany. *Ann Behav Med* 2018;52(4):273-286.
14. Sikorski C, Luppá M, Angermeyer MC, et al. The association of BMI and social distance towards obese individuals is mediated by sympathy and understanding. *Soc Sci Med* 2015;128:25-30.
15. Himmelstein MS, Puhl RM, Quinn DM. Intersectionality: an understudied framework for addressing weight stigma. *Am J Prev Med* 2017;53(4):421-431.
16. Puhl RM, Andreyeva T, Brownell KD. Perceptions of weight discrimination: Prevalence and comparison to race and gender discrimination in America. *Int J Obes* 2008;32(6):992-1000.

17. Tang-Péronard JL, Heitmann BL. Stigmatization of obese children and adolescents, the importance of gender. *Obes Rev* 2008;9(6):522-534.
18. Almenara CA, Ježek S. The source and impact of appearance teasing: An examination by sex and weight status among early adolescents from the Czech Republic. *J Sch Health* 2015;85(3):163-170.
19. Fikkan JL, Rothblum ED. Is fat a feminist issue? Exploring the gendered nature of weight bias. *Sex Roles* 2012;66:575-592.
20. Hebl MR, Turchin JM. The stigma of obesity: What about men? *Basic Appl Soc Psych* 2005;27(3):267-275.
21. Slater LZ, Moneyham L, Vance DE, et al. The multiple stigma experience and quality of life in older gay men with HIV. *J Assoc Nurses AIDS Care* 2015;26(1):24-35.
22. Grollman EA. Multiple disadvantaged statuses and health: the role of multiple forms of discrimination. *J Health Soc Behav* 2014;55(1):3-19.
23. Radcliffe J, Doty N, Hawkins LA, et al. Stigma and sexual health risk in HIV-positive African American young men who have sex with men. *AIDS Patient Care STDS* 2010;24(8):493-499.
24. Puhl RM, Luedicke J, Heuer CA. The stigmatizing effect of visual media portrayals of obese persons on public attitudes: does race or gender matter? *J Health Commun* 2013;18(7):805-826.
25. Mackenbach JP, Stirbu I, Roskam A-JR, et al. Socioeconomic inequalities in health in 22 European countries. *N Engl J Med* 2008;358(23):2468-2481.
26. Kuntz B, Lampert T. Socioeconomic factors and obesity. *Dtsch Arzteblatt Int* 2010;107(30):517-522.
27. infas [Institute for Applied Social Sciences]. [About every tenth person without landline in household] [Internet]. [https://www.infas.de/fileadmin/user\\_upload/PDF/infas\\_PM\\_Mobile\\_Only\\_Kommunikationsmonitor.pdf](https://www.infas.de/fileadmin/user_upload/PDF/infas_PM_Mobile_Only_Kommunikationsmonitor.pdf). Last accessed January 9, 2018.
28. Kish L. A procedure for objective respondent selection within the household. *J Am Stat Assoc* 1949;44(247):380-387.
29. von dem Knesebeck O, Kofahl C, Makowski AC. Differences in depression stigma towards ethnic and socio-economic groups in Germany – exploring the hypothesis of double stigma. *J Affect Disord* 2016;208:82-86.
30. Makowski AC, Mnich EE, Ludwig J, et al. Changes in beliefs and attitudes toward people with depression and schizophrenia - results of a public campaign in Germany. *Psychiatry Res* 2016;237:271-278.
31. Schlinzig T, Schneiderat G. [Possibilities to increase availability in telephone surveys]. In: Weichbold M, Bacher J, Wolf C, eds. [Survey research: challenges and limits]. Wiesbaden: VS Verlag für Sozialwissenschaften 2009:21-43.
32. Evans SC, Roberts MC, Keeley JW, et al. Vignette methodologies for studying clinicians' decision-making: Validity, utility, and application in ICD-11 field studies. *Int J Clin Heal Psychol* 2015;15(2):160-170.

- 1
  - 2
  - 3
  - 4
  - 5
  - 6
  - 7
  - 8
  - 9
  - 10
  - 11
  - 12
  - 13
  - 14
  - 15
  - 16
  - 17
  - 18
  - 19
  - 20
  - 21
  - 22
  - 23
  - 24
  - 25
  - 26
  - 27
  - 28
  - 29
  - 30
  - 31
  - 32
  - 33
  - 34
  - 35
  - 36
  - 37
  - 38
  - 39
  - 40
  - 41
  - 42
  - 43
  - 44
  - 45
  - 46
  - 47
  - 48
  - 49
  - 50
  - 51
  - 52
  - 53
  - 54
  - 55
  - 56
  - 57
  - 58
  - 59
  - 60
33. Schomerus G, Matschinger H, Angermeyer MC. Continuum beliefs and stigmatizing attitudes towards persons with schizophrenia, depression and alcohol dependence. *Psychiatry Res* 2013;209(3):665-669.
34. Sikorski C, Luppá M, Brähler E, et al. Obese children, adults and senior citizens in the eyes of the general public: results of a representative study on stigma and causation of obesity. *PLoS One* 2012;7(10):e46924.doi:10.1371/journal.pone.0046924.
35. Bacon JG, Scheltema KE, Robinson BE. Fat phobia scale revisited: The short form. *Int J Obes* 2001;25(2):252-257.
36. Robinson BBE, Bacon JG, Reilly JO. Fat Phobia: Measuring, understanding, and changing Anti-Fat Attitudes. *Int J Eat Disord* 1993;14(4):467-480.
37. Stein J, Luppá M, Ruzanska U, et al. Measuring negative attitudes towards overweight and obesity in the German population-Psychometric properties and reference values for the German short version of the Fat Phobia Scale (FPS). *PLoS One* 2014;9(12): e114641.doi:10.1371/journal.pone.0114641.
38. Puhl RM, Luedicke J, Heuer C. Weight-based victimization toward overweight adolescents: Observations and reactions of peers. *J Sch Health* 2011;81(11):696-703.
39. Angermeyer MC, Holzinger A, Matschinger H. Emotional reactions to people with mental illness. *Epidemiol Psychiatr Sci* 2010;19(1):26-32.
40. Link BG, Cullen FT, Wozniak JF. The social rejection of former mental patients: understanding why labels matter. *Am J Sociol* 1987;92(6):1461-500.
41. Bogardus E. Measuring social distance. *J Appl Sociol* 1925;9:299-308.
42. IBM. SPSS Statistics for Windows. Armonk, NY: IBM Corp. 2013.
43. International Labour Office. International Standard Classification of Occupations: ISCO-08 [Internet]. [http://www.ilo.org/wcmsp5/groups/public/---dgreports/---dcomm/--publ/documents/publication/wcms\\_172572.pdf](http://www.ilo.org/wcmsp5/groups/public/---dgreports/---dcomm/--publ/documents/publication/wcms_172572.pdf). Last accessed January 9, 2018.
44. Crenshaw K. Demarginalizing the intersection of race and sex: a black feminist critique of antidiscrimination doctrine, feminist theory and antiracist politics. *Univ Chic Leg Forum* 1989;139:139-167.
45. Harris MB, Harris RJ, Bochner, S. Fat, four-eyed, and female: stereotypes of obesity, glasses, and gender. *J Appl Soc Psychol* 1982;12(6):503-516.
46. Brennan MA, Lalonde CE, Bain JL. Body image perceptions: do gender differences exist? *Psy Chi J Undergrad Res* 2010;15(3):130-138.
47. Grossbard JR, Neighbors C, Larimer ME. Perceived norms for thinness and muscularity among college students: what do men and women really want? *Eat Behav* 2011;12(3):192-199.
48. Boswell RG, White MA. Gender differences in weight bias internalisation and eating pathology in overweight individuals. *Adv Eat Disord* 2015;3(3):259-268.
49. Briggs SR, Cheek JM. The role of factor analysis in the development and evaluation of personality scales. *J Pers* 1986;54(1):106-148.

## APPENDIX

### Female vignettes

Diana D. is *a lawyer* and 46 years old. With a height of 5'5 and a weight of 200 pounds, she is severely overweight.

Diana D. is *a cleaner* and 46 years old. With a height of 5'5 and a weight of 200 pounds, she is severely overweight.

### Male vignettes

John D. is *a lawyer* and 46 years old. With a height of 5'9 and a weight of 230 pounds, he is severely overweight.

John D. is *a janitor* and 46 years old. With a height of 5'9 and a weight of 230 pounds, he is severely overweight.



# BMJ Open

## Social deprivation, gender and obesity: multiple stigma? Results of a population survey from Germany

|                                 |                                                                                                                                                                                                                                                                                                                                                                                                                                                                |
|---------------------------------|----------------------------------------------------------------------------------------------------------------------------------------------------------------------------------------------------------------------------------------------------------------------------------------------------------------------------------------------------------------------------------------------------------------------------------------------------------------|
| Journal:                        | <i>BMJ Open</i>                                                                                                                                                                                                                                                                                                                                                                                                                                                |
| Manuscript ID                   | bmjopen-2018-023389.R1                                                                                                                                                                                                                                                                                                                                                                                                                                         |
| Article Type:                   | Research                                                                                                                                                                                                                                                                                                                                                                                                                                                       |
| Date Submitted by the Author:   | 05-Sep-2018                                                                                                                                                                                                                                                                                                                                                                                                                                                    |
| Complete List of Authors:       | Makowski, Anna; University Medical Center Hamburg-Eppendorf, Department of Medical Sociology<br>Kim, Tae; University Medical Center Hamburg-Eppendorf, Department of Medical Sociology<br>Luck-Sikorski, Claudia; SRH University of Applied Health Sciences; University of Leipzig, Integrated Research and Treatment Center (IFB) Adiposity Diseases<br>von dem Knesebeck, Olaf; University Medical Center Hamburg-Eppendorf, Department of Medical Sociology |
| <b>Primary Subject Heading</b>: | Sociology                                                                                                                                                                                                                                                                                                                                                                                                                                                      |
| Secondary Subject Heading:      | Sociology                                                                                                                                                                                                                                                                                                                                                                                                                                                      |
| Keywords:                       | multiple stigma, obesity, Germany, differences, socioeconomic status, gender                                                                                                                                                                                                                                                                                                                                                                                   |
|                                 |                                                                                                                                                                                                                                                                                                                                                                                                                                                                |

SCHOLARONE™  
Manuscripts



# **Social deprivation, gender and obesity: multiple stigma? Results of a population survey from Germany**

Anna C. Makowski<sup>1</sup>, Tae Jun Kim\*<sup>1</sup>, Claudia Luck-Sikorski<sup>2,3</sup>, Olaf von dem Knesebeck<sup>1</sup>

<sup>1</sup>*Department of Medical Sociology, University Medical Center Hamburg-Eppendorf, Martinistrasse 52, 20146 Hamburg, Germany*

<sup>2</sup>*Integrated Research and Treatment Center (IFB) Adiposity Diseases, University of Leipzig, Philipp-Rosenthal-Str. 27, 04103 Leipzig, Germany*

<sup>3</sup>*SRH University of Applied Health Sciences, Neue Str. 28-30, 07548 Gera, Germany*

E-mail: t.kim@uke.de

\*Corresponding author

Word count: 3,554

## Social deprivation, gender and obesity: multiple stigma? Results of a population survey from Germany

**Objectives:** Individuals with obesity are subject to stigmatization, resulting in discrimination. Studies focusing on obesity stigma often do not account for social conditions that also may be associated with stigmatization. Following an intersectional approach, social categories such as gender and socio-economic status (SES) can interact and form a basis for multiple stigma. The present study analyses differences in public obesity stigma depending on gender and SES, as well as possible interdependencies between these social categories.

**Design:** Representative cross-sectional telephone survey.

**Participants:** 692 randomly selected adults ( $\geq 18$  years) in Germany.

**Methods:** Different vignettes were presented, depicting a lawyer (male/female) or a janitor/cleaner (male/female) with obesity. Following the vignette, different components of stigma were assessed: (1) fat phobia, (2) emotional reactions to a person with obesity, and (3) desire for social distance. Associations between gender, SES, and stigma components were tested in multiple linear regression analyses.

**Results:** A low SES in the obesity vignette (janitor/cleaner) was significantly associated with higher fat phobia scores as well as desire for social distance, compared to the vignette with a person with obesity and a high SES (lawyer). Being a male with obesity was significantly associated with more pronounced negative emotional reactions and greater desire for social distance. There were no significant interaction effects between gender and SES.

**Conclusions:** Results support the hypothesis of multiple stigma. Being male or of low SES was significantly associated with more pronounced negative attitudes in the German public. Following the concept of intersectionality, our findings indicate that obesity stigma can exacerbate pre-existing inequalities. This needs to be considered in development and implementation of prevention and anti-stigma measures.

**Keywords:** stigma; multiple stigma; attitudes; obesity; Germany; differences; socioeconomic status; occupational position; gender

## STRENGTHS AND LIMITATIONS OF THIS STUDY

- This is the first study analyzing socio-economic status (SES) and gender in the context of public obesity stigma.
- Analyses are based on a national telephone survey not only relying on landline but also including mobile-only users all over Germany.
- Pre-recorded audio vignettes were used to identify additive stigma effects. For a separation of obesity stigma from the stigma associated with gender and SES, a neutral control vignette would have been necessary.
- Although vignettes are a frequently used method in stigma research, they need to be short and bear the risk of not conveying a holistic picture of an individual with obesity and different social characteristics.

## INTRODUCTION

The proportion of people who are overweight or obese has increased continuously over the past decades.[1] In Germany, the current Health Interview and Examination Survey for Adults reports a prevalence rate of obesity (defined as Body Mass Index (BMI)  $\geq 30\text{kg/m}^2$ ) of approximately 24%.[2] The etiology of obesity is often multi-faceted, different factors such as behavioral, biological, psychosocial, context-related or prenatal conditions concur.[3] However, poor diet and sedentary behavior are often erroneously seen as the primary reason for overweight.[4] This in turn lays the focus on individual responsibility and fosters public stereotypes of laziness and weak will. According to attribution theory, believing the condition to be under a person's control determines greater stigmatizing reactions.[5] The public misconception of causes of overweight and obesity is common and contributes to the expression of obesity stigma.[6] Individuals with overweight or obesity display a physical 'mark' that sets them apart from others. Link and Phelan [7] have provided a process model, in which stigma is conceptualized as several distinct, but interrelated steps: differences between social groups are distinguished and *labeled*. These labels are linked to *stereotypes* (undesired characteristics) that form the basis of a *separation* of 'us' and 'them'. Thusly-labeled individuals experience *status loss* and *discrimination* in a context in which power is exercised.

There is a public recognition of obesity as a chronic condition and it is a classified disease in some countries (but not Germany).[8] Nevertheless, individuals with obesity experience discrimination in daily life, which in turn reinforces negative stereotypes and stigmatizing processes.[7] Ascribing negative attributes such as unintelligent, lack of self-discipline or emotionally instable [9,10] to persons who are obese, activates processes that result in discrimination in different settings. This could be shown for the education and employment sector as well as personal relationships.[10] Furthermore, stigmatizing attitudes and discrimination are present in the health care sector, possibly leading to the avoidance of necessary treatment.[11] The adverse health consequences of obesity stigma have been shown on psychological (e.g. depression, self-esteem) and physical (eating behavior, physical activity, cardiovascular health outcomes) levels.[10]

For Germany, a study found that about one fourth of the general public displays stigmatizing attitudes regarding the 'Weight Control/Blame' subscale from the Antifat Attitudes Test.[12] High levels of responsibility for becoming obese are attributed to the individual, which is associated with the belief that the individual should be liable for treatment costs to a great

1  
2  
3 extent.[13] Sikorski et al. examined emotional reactions and social distance towards  
4 individuals with obesity and found that the most rejected domains were personal ability as  
5 well as social interaction.[14]  
6  
7

8 In terms of gender differences, studies reported higher weight bias internalization [15] and  
9 greater risk for weight/height discrimination [16] among women. In children and adolescents,  
10 girls with overweight have been found to be subject to teasing and social  
11 marginalization.[17,18] Similar results are presented by Fikkan and Rothblum,[19] who found  
12 women with obesity to be more stigmatized in education and employment sectors than men.  
13 However, gender differences in obesity stigma have rarely been examined, and results are not  
14 consistent.[20]  
15  
16  
17  
18  
19

20 Over the past years, stigma research has paid increased attention to multiple social identities  
21 and their interaction to influence stigmatization. This intersectional approach allows  
22 examining how multiple social categories, e.g. being categorized as ‘female’, ‘black’ or both,  
23 interact to produce or protect against health risks or discrimination.[15] A similar approach is  
24 referred to as ‘multiple stigma’ [21] or ‘double disadvantage’.[22] These concepts suggest  
25 that a person can belong to different, possibly stigmatized social groups which exerts  
26 cumulative effects.[23] When it comes to obesity stigma at the intersection of gender and  
27 race, the few studies have come to different results. While in a study of Himmelstein et al.  
28 [15] no divergences in stigma as a function of race or gender emerged, Puhl et al. found that  
29 African American females who are obese evoked higher ratings of dislike and social distance  
30 than Caucasian females with obesity.[24]  
31  
32  
33  
34  
35  
36  
37  
38

39 So far, there is no study focusing on possible additive or multiple effects of gender and socio-  
40 economic status (SES) in the context of obesity stigma. This is astonishing, as there are socio-  
41 economic inequalities in the prevalence of obesity.[25] This also holds true for Germany,  
42 where obesity is more common among children and adults who are of low SES. Especially  
43 women in this group appear to be excessively affected by obesity.[26]  
44  
45  
46

47 Against this background, we analyze differences in public stigma towards low vs. high SES  
48 persons as well as female vs. male persons with obesity. By incorporating the interaction of  
49 gender x SES, we additionally examine possible interdependencies and their associations with  
50 obesity stigma.  
51  
52  
53  
54  
55  
56  
57  
58  
59  
60

## METHODS

### Study design and sample

Analyses are based on a national telephone survey (computer assisted telephone interview (CATI)), conducted between March and April 2017. The sampling was based on data of the Association of German Market and Social Research (ADM), which includes registered as well as non-registered telephone numbers via random digital dialing. Already in 2010, around 13% of adults (age 16 years and older) in Germany did not have access to landline and solely used a mobile phone.[27] As this proportion has increased since 2010 and in order to increase the probability to reach persons who are rarely at home, we incorporated a share of 30% mobile numbers in the initial sample. To ensure a sample representative of the German population, all regions in Germany were included.

Regarding mobile numbers, target persons were owner or main user of the mobile phone. The connection was considered a neutral drop-out if the respondent was younger than 18 years. In households that were contacted via landline, the Kish-Selection-Grid [28] was applied to randomly select a person from this household. To this aim, the interviewer collected the age and gender of everyone in the household that was eligible for the survey and then randomly selected the respondent from that list. In the beginning of the interview, respondents were informed that the survey's focus was on nutrition, health, and wellbeing.

The overall sample of this study consisted of N=1,401 persons. To obtain this number, 2,849 people were randomly selected (net sample). Of these, n=862 (30.25%) refused to participate in the interview. Further n=586 (20.57%) could not be reached. This led to a total response rate of 49.18%. Previous telephone interview studies have reached similar rates [29,30] and the response can be regarded satisfactory for telephone surveys in Germany.[31] In the study, eight different vignettes were used. The present analyses focus on four vignettes depicting a lawyer (male/female) or a janitor/cleaner (male/female) with obesity, resulting in a subsample of n=692 under study.

The Ethics Commission of the Medical Association in Hamburg approved this study (No. PV5421). Since the interviews were telephone-based, the respondents were verbally informed about the study and asked for consent to participate. Participants' consent and refusal were documented. As we used data from a population survey, patients were not involved in the development and design of the research question and the study.

### Instruments

### *Vignette manipulation*

Vignettes have been frequently applied in the social sciences to investigate attitudes or intended behavior.[32] In stigma research, they have been used to convey realistic pictures of an individual, e.g. with depression, schizophrenia, or obesity.[33,34]

In the present study, all pre-recorded audio vignettes conveyed the same information, while two characteristics were varied: gender (female/male) and occupational position as an indicator of SES (low = janitor or cleaner / high = lawyer). This resulted in four different case stories that described an individual with obesity (please see appendix). One vignette was randomly assigned to each respondent, resulting in about 175 respondents per vignette. Weight and height were stated, yielding a BMI of approximately 32 kg/m<sup>2</sup>. This was further emphasized by the comment that the person 'is severely overweight'. A trained speaker audio-recorded the case stories. To neutralize possible interviewer effects, the files were directly played to the respondents from the computer via telephone line. Preceding the presentation of the vignette, there was a set of questions related to respondents' own experience with overweight. This was self-reported weight and height, if the respondent has ever been overweight, tried to lose weight or has personal contact to persons with obesity.

### *Obesity stigma*

To assess stigmatizing attitudes toward the person described in the vignette, the short form of the *Fat Phobia Scale (FPS)* by Bacon et al. [35] was used. It is comprised of 14 items and constitutes the first factor of the original 50-item scale.[36] The short version demonstrated excellent reliability and was strongly correlated with the long form. Moreover, the 14-item-scale accounted for the largest amount of variance in factor analysis.[35] On a 5-point semantic differential scale, 14 pairs of adjectives are introduced that capture common beliefs about people who are obese. The FPS short form has been translated and applied in the German-speaking area by Luck-Sikorski et al..[34] Principal component analysis with varimax rotation yielded a 4-factorial solution, with the eigenvalue of the fourth factor barely exceeding 1. Similar to a validation study for the German short version of the FPS, the first factor explained the greatest share of variation (25.58%, second factor 10.80%, third factor 8.19%, fourth factor 7.31%) which is why a one factorial solution is supported.[37] Following Bacon et al. [35], items were inverted where necessary, so that a higher score indicates greater fat phobia. The sum score was divided by the number of items so that the score ranges from 1 to 5. Values < 2.5 indicate positive attitudes and values ≥ 2.5 represent negative attitudes toward a person with obesity.[38] Cronbach's  $\alpha$  for the FPS was 0.77.



1  
2  
3 Emotional reactions were assessed by nine items representing different ways of emotionally  
4 responding to the person described in the vignette. Six items were derived from a scale used  
5 in studies on mental illness stigma,[39] while three items were developed based on common  
6 stereotypes of obesity. The items were coded from 1 ‘completely disagree’ to 4 ‘completely  
7 agree’. A principal component analysis with varimax rotation yielded two different factors.  
8 The first factor, termed *negative emotional reactions*, was comprised of the six items ‘I react  
9 angrily’, ‘I feel annoyed’, ‘This triggers incomprehension with me’, ‘I feel repelled’, ‘I feel  
10 disgust’, and ‘I think this is unaesthetic’. The items “I feel pity”, “I feel sympathy”, and “I  
11 want to help” loaded on the second factor of *positive emotional reactions*. Together, the two  
12 factors accounted for 50.9 % of variance. Two sum scores were computed, Cronbach’s  $\alpha$  was  
13 0.78 for negative (6 items), and 0.47 for positive emotional reactions (3 items).  
14  
15  
16  
17  
18  
19  
20

21 Desire for social distance was assessed by a scale developed by Link et al.,[40] a modified  
22 version of the Bogardus *Social Distance Scale*. [41] The instrument contains seven items that  
23 represent different social relationships (e.g. neighbor, colleague, or child-carer). On a 4-point  
24 Likert-scale, respondents were asked to indicate to what extent they would accept the person  
25 described in the vignette. A principal component analysis with varimax rotation was carried  
26 out; yielding a single factor that explained 55.1 % of variance. Cronbach’s  $\alpha$  was 0.86. Again,  
27 a sum score was computed, with higher scores indicating greater desire for social distance.  
28  
29  
30  
31  
32

### 33 **Statistical analyses**

34 The analyses were performed using SPSS 22.[42] To test for significant mean differences  
35 between groups regarding single items and scales, Mann-Whitney-U tests were applied since  
36 responses to the stigma items did not follow a normal distribution. Determinants of  
37 stigmatizing attitudes were introduced into regression models. We analyzed two main effects  
38 presented in the vignette: SES (janitor or cleaner/lawyer) and gender (female/male). To take  
39 into account possible interdependencies, the interaction effect of SES x gender was also  
40 introduced into the models. All models were controlled for respondents’ characteristics. Age  
41 and BMI were entered as continuous variables. The respondents’ occupational position was  
42 expressed in skill levels according to the International Standard Classification of Occupation  
43 (ISCO-08).[43] Other variables were the respondents’ gender and personal contact to  
44 individuals who are obese.  
45  
46  
47  
48  
49  
50  
51  
52  
53  
54  
55  
56  
57  
58  
59  
60



1  
2  
3 In all analyses, the response options ‘prefer not to say’ and ‘don’t know’ were treated as  
4 missing values. Exact p values are reported. In view of the number of tests, values of  $p < 0.01$   
5 were regarded as statistically significant.  
6  
7  
8  
9

## 10 **RESULTS**

11 Sociodemographic characteristics of the analyzed sample are briefly presented in table 1. The  
12 sex ratio is relatively even, which is similar to the general adult population in Germany  
13 according to the official statistics [44]. In terms of age, people aged 25 to 39 are  
14 underrepresented and people aged 60 to 64 are overrepresented in the sample compared to the  
15 distribution in the official statistics [45]. Almost half of the respondents work in occupational  
16 positions that are regarded skill level 2 when referring to ISCO.[43] Regarding weight status,  
17 more than 50% of the respondents are either overweight or obese. The share of those who are  
18 overweight/obese corresponds to numbers obtained by other representative studies in  
19 Germany.[2] The vast majority has or had personal contact to someone who is overweight.  
20  
21  
22  
23  
24  
25  
26  
27  
28  
29  
30  
31  
32  
33  
34  
35  
36  
37  
38  
39  
40  
41  
42  
43  
44  
45  
46  
47  
48  
49  
50  
51  
52  
53  
54  
55  
56  
57  
58  
59  
60

**Table 1** Sociodemographic characteristics and weight status of the sample (n=627-692)

|                                                                            |             |
|----------------------------------------------------------------------------|-------------|
| <b>Gender</b> (female)                                                     | 48.9%       |
| <b>Mean age</b> (standard deviation)                                       | 50.9 (18.0) |
| <b>Age groups</b>                                                          |             |
| 18 - ≤ 24 years                                                            | 8.1%        |
| 25 - ≤ 39 years                                                            | 20.0%       |
| 40 - ≤ 59 years                                                            | 35.1%       |
| 60 - ≤ 64 years                                                            | 12.6%       |
| ≥ 65 years                                                                 | 24.2%       |
| <b>Occupational position</b> (ISCO-08)                                     |             |
| Skill level 1: <i>Simple/routine physical or manual tasks</i>              | 7.0%        |
| Skill level 2: <i>Operating machinery and electronic equipment</i>         | 45.5%       |
| Skill level 3: <i>Complex technical and practical tasks</i>                | 27.1%       |
| Skill level 4: <i>Complex problem-solving, decision-making, creativity</i> | 20.3%       |
| <b>Weight status according to BMI</b>                                      |             |
| <i>Underweight</i> (≤ 18.49)                                               | 2.1%        |
| <i>Normal weight</i> (18.50 – 24.99)                                       | 42.5%       |
| <i>Overweight</i> (25.00 – 29.99)                                          | 34.2%       |
| <i>Obese</i> (≥ 30.00)                                                     | 21.2%       |
| <b>Contact to someone who is overweight</b> (yes)                          | 84.4%       |

In tables 2-4, differences in the mean stigma values depending on SES and gender presented in the vignette are reported. Regarding the fat phobia items, the adjective low self-esteem was ascribed to the female vignette significantly more often (respective means were 3.10 for the female vignette and 2.83 for the male vignette, table 2). In contrast, lazy, slow, and self-indulgent were significantly more often attributed to the male vignette. Comparing low and high SES, a homogenous picture emerged. A low SES was significantly associated with greater negative attitudes, expressing individual responsibility (no willpower, poor self-control, weak) as well as insecurity and low self-esteem when compared to high SES.

**Table 2** Fat phobia (FPS, single items and scale); differences according to gender and socio-economic status (SES) in the vignette (mean values (standard deviation))

| Pair of adjectives                                           | Gender                |                     |        | SES                                   |                               |        |
|--------------------------------------------------------------|-----------------------|---------------------|--------|---------------------------------------|-------------------------------|--------|
|                                                              | Female<br>(n=337-348) | Male<br>(n=306-316) | p*     | Low<br>Janitor/cleaner<br>(n=317-327) | High<br>Lawyer<br>(n=326-337) | p*     |
| <i>Industrious ... lazy</i> <sup>1</sup>                     | 2.55 (0.92)           | 2.83 (0.81)         | <0.001 | 2.68 (0.87)                           | 2.69 (0.89)                   | 0.667  |
| <i>Has willpower ... no willpower</i> <sup>1</sup>           | 3.28 (0.97)           | 3.21 (1.04)         | 0.602  | 3.48 (0.98)                           | 3.03 (0.97)                   | <0.001 |
| <i>Attractive ... unattractive</i> <sup>1</sup>              | 3.33 (1.00)           | 3.42 (0.94)         | 0.160  | 3.43 (1.05)                           | 3.32 (0.90)                   | 0.149  |
| <i>Good self-control ... poor self-control</i> <sup>1</sup>  | 3.10 (1.03)           | 3.17 (0.98)         | 0.440  | 3.30 (0.99)                           | 2.97 (1.00)                   | <0.001 |
| <i>Fast ... slow</i> <sup>1</sup>                            | 3.25 (1.01)           | 3.47 (0.99)         | 0.002  | 3.32 (1.06)                           | 3.39 (0.96)                   | 0.592  |
| <i>Having endurance ... having no endurance</i> <sup>1</sup> | 3.41 (1.13)           | 3.37 (1.04)         | 0.297  | 3.39 (1.10)                           | 3.40 (1.07)                   | 0.688  |
| <i>Active ... inactive</i> <sup>1</sup>                      | 3.36 (0.98)           | 3.38 (1.06)         | 0.328  | 3.38 (1.06)                           | 3.35 (0.97)                   | 0.650  |
| <i>Strong ... weak</i> <sup>1</sup>                          | 3.15 (0.99)           | 3.18 (1.02)         | 0.914  | 3.33 (1.03)                           | 3.01 (0.94)                   | <0.001 |
| <i>Self-sacrificing ... self-indulgent</i> <sup>1</sup>      | 3.19 (0.91)           | 3.41 (0.86)         | <0.001 | 3.32 (0.90)                           | 3.28 (0.89)                   | 0.375  |
| <i>Dislikes food ... likes food</i>                          | 4.05 (0.88)           | 4.15 (0.90)         | 0.093  | 4.08 (0.90)                           | 4.12 (0.88)                   | 0.584  |
| <i>Shapely ... shapeless</i> <sup>1</sup>                    | 3.41 (1.15)           | 3.21 (1.17)         | 0.098  | 3.40 (1.16)                           | 3.31 (1.17)                   | 0.753  |
| <i>Undereats ... overeats</i> <sup>1</sup>                   | 3.87 (0.91)           | 3.95 (0.90)         | 0.306  | 3.91 (0.93)                           | 3.90 (0.89)                   | 0.883  |
| <i>Secure ... insecure</i> <sup>1</sup>                      | 3.01 (1.06)           | 2.81 (1.03)         | 0.027  | 3.24 (1.02)                           | 2.61 (0.98)                   | <0.001 |
| <i>High self-esteem ... low self-esteem</i> <sup>1</sup>     | 3.10 (1.05)           | 2.83 (1.05)         | <0.001 | 3.28 (1.00)                           | 2.67 (1.02)                   | <0.001 |
| <b>FPS</b> <sup>1</sup>                                      | 3.31 (0.48)           | 3.32 (0.50)         | 0.995  | 3.40 (0.51)                           | 3.22 (0.46)                   | <0.001 |

<sup>1</sup>Semantic differential scales and mean FPS ranging from 1 to 5, values > 2.50 indicate greater fat phobia; \*Mann-Whitney-U test

Regarding emotional reactions (table 3), the comparison of gender in the vignette showed that males with obesity evoked significantly more negative emotional reactions on four out of six items as well as on the subscale for negative emotions (respective means were 9.67 for the female vignette and 10.54 for the male vignette). In terms of SES, a cleaner/janitor with obesity evoked significantly more feelings of anger but also more positive emotional reactions, compared to a lawyer with obesity.

**Table 3** Emotional reactions (single items and scales); differences according to gender and socio-economic status (SES) in the vignette (mean values (standard deviation))

|                                                 | Gender                |                     |                | SES                                   |                               |              |
|-------------------------------------------------|-----------------------|---------------------|----------------|---------------------------------------|-------------------------------|--------------|
|                                                 | Female<br>(n=327-350) | Male<br>(n=293-315) | p*             | Low<br>Janitor/cleaner<br>(n=299-326) | High<br>Lawyer<br>(n=321-338) | p*           |
| <i>Annoyed</i> <sup>1</sup>                     | 1.56 (0.72)           | 1.59 (0.70)         | 0.290          | 1.65 (0.79)                           | 1.50 (0.62)                   | 0.056        |
| <i>Angry</i> <sup>1</sup>                       | 1.36 (0.64)           | 1.55 (0.71)         | < <b>0.001</b> | 1.52 (0.71)                           | 1.38 (0.64)                   | <b>0.005</b> |
| <i>Incomprehension</i> <sup>1</sup>             | 1.88 (0.89)           | 2.04 (0.83)         | <b>0.006</b>   | 2.05 (0.87)                           | 1.87 (0.85)                   | 0.012        |
| <i>Revolted</i> <sup>1</sup>                    | 1.46 (0.69)           | 1.67 (0.75)         | < <b>0.001</b> | 1.62 (0.78)                           | 1.50 (0.67)                   | 0.114        |
| <i>Disgust</i> <sup>1</sup>                     | 1.41 (0.66)           | 1.53 (0.66)         | <b>0.002</b>   | 1.51 (0.69)                           | 1.42 (0.94)                   | 0.078        |
| <i>Unaesthetic</i> <sup>1</sup>                 | 2.01 (0.94)           | 2.15 (0.87)         | 0.022          | 2.08 (0.87)                           | 2.07 (0.95)                   | 0.919        |
| Negative emotional reactions scale <sup>2</sup> | 9.67 (3.06)           | 10.54 (3.24)        | <b>0.001</b>   | 10.43 (3.23)                          | 9.74 (3.05)                   | 0.012        |
| <i>Sympathy</i> <sup>1</sup>                    | 2.58 (0.81)           | 2.53 (0.78)         | 0.769          | 2.54 (0.82)                           | 2.57 (0.77)                   | 0.884        |
| <i>Pity</i> <sup>1</sup>                        | 2.24 (0.94)           | 2.09 (0.90)         | 0.020          | 2.23 (0.92)                           | 2.11 (0.92)                   | 0.034        |
| <i>Want to help</i> <sup>1</sup>                | 2.20 (0.93)           | 2.26 (0.86)         | 0.414          | 2.34 (0.93)                           | 2.12 (0.85)                   | 0.011        |
| Positive emotional reactions scale <sup>3</sup> | 6.97 (1.96)           | 6.86 (1.74)         | 0.692          | 7.08 (2.01)                           | 6.97 (1.96)                   | <b>0.004</b> |

<sup>1</sup>Single items ranging from 1 to 4; <sup>2</sup>Negative emotional reaction scales comprised of six items; sum scale ranging from 6 to 24; <sup>3</sup>Positive emotional reaction scale comprised of three items; sum scale ranging from 3 to 12; \*Mann-Whitney-U test

A consistent picture emerged when comparing desire for social distance according to the person's gender in the vignette (table 4). Males with obesity were met with significantly greater levels of rejection in most aspects of social distance. Gender difference was also significant for the desire for social distance scale (13.15 for males and 11.66 for females). Similarly, a person who is obese and has a low SES evoked greater desire for social distance concerning four of seven items. Also, the desire for social distance scale significantly differed between the SES vignettes (13.03 for low SES and 11.72 for high SES).

**Table 4** Desire for social distance (single items and scale); differences according to gender and socio-economic status (SES) in the vignette (mean values (standard deviation))

|                                       | Gender                |                     |        | SES                                   |                             |        |
|---------------------------------------|-----------------------|---------------------|--------|---------------------------------------|-----------------------------|--------|
|                                       | Female<br>(n=332-350) | Male<br>(n=292-312) | p*     | Low<br>Janitor/cleaner<br>(n=307-324) | High<br>Lawyer<br>(317-338) | p*     |
| <i>Tenant</i> <sup>1</sup>            | 1.71 (0.92)           | 1.96 (0.86)         | <0.001 | 1.98 (0.98)                           | 1.68 (0.78)                 | 0.001  |
| <i>Colleague</i> <sup>1</sup>         | 1.39 (0.57)           | 1.48 (0.61)         | 0.012  | 1.43 (0.54)                           | 1.42 (0.63)                 | 0.546  |
| <i>Neighbor</i> <sup>1</sup>          | 1.52 (0.74)           | 1.56 (0.69)         | 0.155  | 1.54 (0.71)                           | 1.54 (0.72)                 | 0.649  |
| <i>Childcare</i> <sup>1</sup>         | 1.70 (0.75)           | 1.95 (0.91)         | <0.001 | 1.98 (0.90)                           | 1.66 (0.74)                 | <0.001 |
| <i>In-law</i> <sup>1</sup>            | 1.79 (0.90)           | 1.90 (0.79)         | 0.003  | 1.98 (0.89)                           | 1.71 (0.78)                 | <0.001 |
| <i>Introduce friend</i> <sup>1</sup>  | 1.74 (0.82)           | 2.25 (0.95)         | <0.001 | 2.08 (0.92)                           | 1.88 (0.90)                 | 0.008  |
| <i>Recommend for job</i> <sup>1</sup> | 1.83 (0.84)           | 2.04 (0.81)         | <0.001 | 2.03 (0.83)                           | 1.83 (0.82)                 | 0.011  |
| Desire for social distance scale      | 11.66<br>(4.12)       | 13.15<br>(4.00)     | <0.001 | 13.03 (4.14)                          | 11.72<br>(4.03)             | <0.001 |

<sup>1</sup>Single items ranging from 1 to 4; <sup>2</sup>Desire for social distance scale comprised of 7 items, sum scale ranging from 7 to 28;

\*Mann-Whitney-U test

The results of multiple linear regression analyses are reported in table 5. While controlling for respondents' characteristics, a significant main effect of SES emerged regarding fat phobia ( $\beta = 0.173$ ). Being a janitor or cleaner with obesity was associated with significantly increased fat phobia compared to lawyers. Regarding positive emotional reactions, there were no significant associations with either gender or SES. However, male persons with obesity were confronted with more negative emotional reactions than females ( $\beta = -0.151$ ). In terms of desire for social distance, both main effects were statistically significant. Being either a male or a janitor/cleaner with obesity was significantly associated with greater desire for social distance. In none of the models did the interaction effect of gender x SES attain statistical significance (table 5).

**Table 5** Linear regression analyses: associations between stigma components and socio-economic status (SES) and gender presented in the vignette

|                                                           | Fat Phobia Scale<br>(n=561) |              |                           | Positive emotional reactions<br>(n=607) |         |                   | Negative emotional reactions<br>(n=614) |               |                             | Social Distance<br>(n=608) |               |                             |
|-----------------------------------------------------------|-----------------------------|--------------|---------------------------|-----------------------------------------|---------|-------------------|-----------------------------------------|---------------|-----------------------------|----------------------------|---------------|-----------------------------|
|                                                           | B                           | $\beta$      | 95% CI                    | B                                       | $\beta$ | 95% CI            | B                                       | $\beta$       | 95% CI                      | B                          | $\beta$       | 95% CI                      |
| <b>Low SES vignette</b><br>(ref. lawyer)                  | <b>0.171</b>                | <b>0.173</b> | <b>0.052 -<br/>0.287*</b> | 0.035                                   | 0.010   | -0.393 -<br>0.464 | 0.304                                   | 0.047         | -0.405 -<br>1.014           | <b>1.122</b>               | <b>0.135</b>  | <b>0.217 -<br/>2.026*</b>   |
| <b>Female gender in</b><br><b>vignette</b><br>(ref. male) | -0.002                      | -0.002       | -0.115 -<br>0.112         | -0.146                                  | -0.039  | -0.556 -<br>0.264 | <b>-0.977</b>                           | <b>-0.151</b> | <b>-1.655 -<br/>-0.299*</b> | <b>-1.201</b>              | <b>-0.145</b> | <b>-2.068 -<br/>-0.334*</b> |
| <b>Interaction gender *</b><br><b>SES in vignette</b>     | -0.021                      | -0.019       | -0.182 -<br>0.139         | 0.539                                   | 0.126   | -0.048 -<br>1.125 | 0.238                                   | 0.032         | -0.730 -<br>1.205           | -0.215                     | -0.023        | -1.451 -<br>1.021           |

\*p<0.01; \*\*p<0.001; the model is adjusted for respondents' gender, age, BMI, occupational position as well as contact to an individual with obesity

## DISCUSSION

The concept of multiple stigma suggests that a person can belong to different potentially stigmatized groups, experiencing an aggregation of disadvantages and discrimination.[23] Applying this approach to the present study, this would mean that because of their group affiliation (e.g. being female and of low SES) individuals suffer multiple stigma when confronted with the burden of obesity. Similarly, the framework of intersectionality describes the interdependent relationship between different social identities and structural inequities.[46] Multiple social categories interact and produce or protect against discrimination. In light of this, obesity stigma can reinforce pre-existing inequalities because of SES and / or gender.

The present study is one of the first to analyze the possible multiple stigma of gender, SES, and obesity. Following an intersectional approach, it was analyzed whether main effects or the interaction of social categories possibly reinforce obesity stigma, implying a double or multiple disadvantage for certain individuals. While there were no statistically significant interaction effects of categories, we found distinct differences in obesity stigma dependent on gender with regard different stigma components. Males with obesity were met with more negative emotional reactions and social distance. This contradicts some previous studies that found (young) women who are overweight or obese to be met with greater stigmatization than men.[15–19] Although Harris et al. [47] showed that stereotypes of obesity can be as severe for men as for women already in 1982, females have often been the center of attention in obesity stigma research. The predominance of overly thin women in the media and the promotion of a slim beauty ideal for females can have different effects on the stigmatization of women and men with obesity.[20] Nevertheless, over the past years, a trim and muscular male body image has come to the fore in most Western societies, shaping a new perspective on body image dissatisfaction and obesity stigma also among men.[48,49] Men have been found to be similarly stigmatized as women for being heavy,[20] and the concern about body image is associated with increased eating pathology in both men and women. [50]

Regarding SES and obesity, the study revealed significant differences in public attitudes in several stigma components under study. Those of low SES were rated less favorably with regard to fat phobia and desire for social distance when compared to persons with high SES. On the other hand, individuals with low SES were also met with significantly greater

1  
2  
3 prosocial feelings. It is possible that, next to being obese, the status of a cleaner/janitor is  
4 linked to characteristics (e.g. economic hardship) that evoke pity among respondents. After  
5 the adjustment of respondents' characteristics in the multivariate analyses (gender, age, BMI,  
6 occupational position as well as contact to an individual with obesity), however, only the  
7 associations with fat phobia and social distance were found to be significant.  
8  
9

10  
11 Following the concept of intersectionality, and against the background of a disproportionate  
12 distribution of obesity (higher prevalence among females of low SES), one could have  
13 expected significant interaction effects in multivariate analyses. We were not able to verify  
14 this assumption. However, significant main effects of gender and SES indicate a double  
15 stigma to the disadvantage of males as well as individuals with a low SES who suffer from  
16 obesity.  
17  
18  
19  
20

21  
22 Some limitations need to be mentioned and discussed when evaluating our findings. More  
23 than half of the individuals eligible for the study were not available or refused to participate.  
24 Although participation rates around 50% can be regarded satisfactory for telephone  
25 surveys,[31] we cannot rule out selection bias due to non-response. With respect to internal  
26 consistency, Cronbach's  $\alpha$  for most scales was good or acceptable. Only the subscale of  
27 positive emotional reactions exhibited unacceptable reliability, which could be due to the  
28 relatively small number of items. In this case, it is recommended to use the mean inter-item  
29 correlation as an indicator for acceptability, which was 0.22 in the present sample. A  
30 satisfactory range is said to be 0.2 to 0.4.[51] Furthermore, no conclusions on causal  
31 relationships can be drawn as our data are based on a cross-sectional design. Similar to other  
32 studies in stigma research, we used vignettes to explore possible multiple stigma of obesity.  
33 On the one hand, these should not be too long. On the other hand, only varying one sentence  
34 to express different social conditions might have been too short to convey a holistic picture of  
35 the individual, or to be kept in mind throughout the whole interview. Moreover, due to time  
36 constraints, every respondent only received one vignette. The lack of a neutral control  
37 condition impedes the interpretation of results. For example, it remains unclear whether  
38 respondents associate adjectives such as low self-esteem or insecurity with the fact that the  
39 individual in the vignette is obese or pursues the profession of a janitor when compared to a  
40 lawyer. This is a limitation that has to be considered when interpreting our findings as an  
41 indication of multiple or double stigma. Finally, sample size may have been too small to  
42 detect significant interaction effects.  
43  
44  
45  
46  
47  
48  
49  
50  
51  
52  
53  
54  
55  
56  
57  
58  
59  
60



1  
2  
3 Differences in stigma based on gender and SES indicate that obesity can exacerbate pre-  
4 existing inequalities. The presence of obesity stigma could be shown in many domains of  
5 daily life, e.g. education, work, personal, and health care.[10,11] Stigmatization is a risk  
6 factor for physical and psychological health problems such as depression, body  
7 dissatisfaction, and low self-esteem. Instead of motivating individuals to lose weight, stigma  
8 is associated with additional weight gain [6] and underutilization of health care.[11] This  
9 implies a vicious circle of mutually reinforcing negative conditions. The manifold effects of  
10 obesity stigma require actions in all kinds of professional disciplines, e.g. among physicians,  
11 dieticians, and scientists in various fields. To encounter stigma, the topic should be the subject  
12 of discussion in obesity intervention measures, and anti-stigma messages have to be  
13 incorporated into obesity prevention campaigns. Our results underline the need to consider the  
14 social dimension of obesity stigma. In acknowledging the interrelation of social conditions  
15 and existing structures, future research should derive tailored measures to encounter obesity  
16 stigma and its related adverse physical and psychological health outcomes.  
17  
18  
19  
20  
21  
22  
23  
24  
25  
26  
27  
28  
29  
30  
31  
32  
33  
34  
35  
36  
37  
38  
39  
40  
41  
42  
43  
44  
45  
46  
47  
48  
49  
50  
51  
52  
53  
54  
55  
56  
57  
58  
59  
60

## DECLARATIONS

### *Ethical approval*

Ethics Commission of the Medical Association Hamburg approved the data collection procedure (No. PV5421).

### *Consent to participate*

Participants provided verbal informed consent.

### *Availability of data and material*

Data are available by request from the corresponding author.

### *Competing interests*

None declared.

### *Funding*

This study is part of the joint research project ‘Nutrition, Health and Modern Society: Germany and the USA’ and is funded by the Volkswagen Foundation.

### *Contributors*

ACM undertook the statistical analyses and wrote the first draft of the manuscript. OvdK conceived the study design and contributed to the manuscript. TJK and CLS contributed to the questionnaire and critically revised the manuscript.

### *Patient involvement*

No patients were involved in this study.

## REFERENCES

1. Ng M, Fleming T, Robinson M, et al. Global, regional and national prevalence of overweight and obesity in children and adults 1980-2013: A systematic analysis. *Lancet* 2014;384(9945):766-781.
2. Mensink GBM, Schienkiewitz A, Haftenberger M, et al. [Overweight and obesity in Germany: Results of the German Health Interview and Examination Survey for Adults (DEGS1)]. *Bundesgesundheitsblatt - Gesundheitsforsch - Gesundheitsschutz* 2013;56(5-6):786-794.
3. Varnaccia G, Zeiher J, Lange C, et al. [Factors influencing childhood obesity – the establishment of a population-wide monitoring system in Germany]. *J Heal Monit* 2017;2(2):85-97.
4. World Health Organization. The Challenge of Obesity in the WHO European Region and the Strategies for Response [Internet]. <http://content.wkhealth.com/linkback/openurl?sid=WKPTLP:landingpage&an=00005768-200803000-00031>. Last accessed January 9, 2018.
5. Weiner B, Perry RP, Magnusson J. An attributional analysis of reactions to stigmas. *J Pers Soc Psychol* 1988;55(5):738-48.
6. Puhl RM, Heuer CA. Obesity stigma: Important considerations for public health. *Am J Public Health* 2010;100(6):1019-1028.
7. Link BG, Phelan JC. Conceptualizing stigma. *Annu Rev Sociol* 2001;27:363-385.
8. World Health Organization. Obesity and overweight [Internet]. <http://www.who.int/mediacentre/factsheets/fs311/en/>. Last accessed January 9, 2018.
9. Puhl R, Brownell KD. Bias, discrimination, and obesity. *Obes Res* 2001;9(12):788-805.
10. Puhl RM, Heuer CA. The stigma of obesity: A review and update. *Obesity* 2009;17(5):941-964.
11. Sikorski C, Luppia M, Glaesmer H, et al. Attitudes of health care professionals towards female obese patients. *Obes Facts* 2013;6(6):512-522.
12. Hilbert A, Rief W, Braehler E. Stigmatizing attitudes toward obesity in a representative population-based sample. *Obesity* 2008;16(7):1529-1534.
13. Mata J, Hertwig R. Public beliefs about obesity relative to other major health risks: representative cross-sectional surveys in the USA, the UK, and Germany. *Ann Behav Med* 2018;52(4):273-286.
14. Sikorski C, Luppia M, Angermeyer MC, et al. The association of BMI and social distance towards obese individuals is mediated by sympathy and understanding. *Soc Sci Med* 2015;128:25-30.
15. Himmelstein MS, Puhl RM, Quinn DM. Intersectionality: an understudied framework for addressing weight stigma. *Am J Prev Med* 2017;53(4):421-431.
16. Puhl RM, Andreyeva T, Brownell KD. Perceptions of weight discrimination: Prevalence and comparison to race and gender discrimination in America. *Int J Obes* 2008;32(6):992-1000.

17. Tang-Péronard JL, Heitmann BL. Stigmatization of obese children and adolescents, the importance of gender. *Obes Rev* 2008;9(6):522-534.
18. Almenara CA, Ježek S. The source and impact of appearance teasing: An examination by sex and weight status among early adolescents from the Czech Republic. *J Sch Health* 2015;85(3):163-170.
19. Fikkan JL, Rothblum ED. Is fat a feminist issue? Exploring the gendered nature of weight bias. *Sex Roles* 2012;66:575-592.
20. Hebl MR, Turchin JM. The stigma of obesity: What about men? *Basic Appl Soc Psych* 2005;27(3):267-275.
21. Slater LZ, Moneyham L, Vance DE, et al. The multiple stigma experience and quality of life in older gay men with HIV. *J Assoc Nurses AIDS Care* 2015;26(1):24-35.
22. Grollman EA. Multiple disadvantaged statuses and health: the role of multiple forms of discrimination. *J Health Soc Behav* 2014;55(1):3-19.
23. Radcliffe J, Doty N, Hawkins LA, et al. Stigma and sexual health risk in HIV-positive African American young men who have sex with men. *AIDS Patient Care STDS* 2010;24(8):493-499.
24. Puhl RM, Luedicke J, Heuer CA. The stigmatizing effect of visual media portrayals of obese persons on public attitudes: does race or gender matter? *J Health Commun* 2013;18(7):805-826.
25. Mackenbach JP, Stirbu I, Roskam A-JR, et al. Socioeconomic inequalities in health in 22 European countries. *N Engl J Med* 2008;358(23):2468-2481.
26. Kuntz B, Lampert T. Socioeconomic factors and obesity. *Dtsch Arzteblatt Int* 2010;107(30):517-522.
27. infas [Institute for Applied Social Sciences]. [About every tenth person without landline in household] [Internet]. [https://www.infas.de/fileadmin/user\\_upload/PDF/infas\\_PM\\_Mobile\\_Only\\_Kommunikationsmonitor.pdf](https://www.infas.de/fileadmin/user_upload/PDF/infas_PM_Mobile_Only_Kommunikationsmonitor.pdf). Last accessed January 9, 2018.
28. Kish L. A procedure for objective respondent selection within the household. *J Am Stat Assoc* 1949;44(247):380-387.
29. von dem Knesebeck O, Kofahl C, Makowski AC. Differences in depression stigma towards ethnic and socio-economic groups in Germany – exploring the hypothesis of double stigma. *J Affect Disord* 2016;208:82-86.
30. Makowski AC, Mnich EE, Ludwig J, et al. Changes in beliefs and attitudes toward people with depression and schizophrenia - results of a public campaign in Germany. *Psychiatry Res* 2016;237:271-278.
31. Schlinzig T, Schneiderat G. [Possibilities to increase availability in telephone surveys]. In: Weichbold M, Bacher J, Wolf C, eds. [Survey research: challenges and limits]. Wiesbaden: VS Verlag für Sozialwissenschaften 2009:21-43.
32. Evans SC, Roberts MC, Keeley JW, et al. Vignette methodologies for studying clinicians' decision-making: Validity, utility, and application in ICD-11 field studies. *Int J Clin Heal Psychol* 2015;15(2):160-170.

- 1
  - 2
  - 3
  - 4
  - 5
  - 6
  - 7
  - 8
  - 9
  - 10
  - 11
  - 12
  - 13
  - 14
  - 15
  - 16
  - 17
  - 18
  - 19
  - 20
  - 21
  - 22
  - 23
  - 24
  - 25
  - 26
  - 27
  - 28
  - 29
  - 30
  - 31
  - 32
  - 33
  - 34
  - 35
  - 36
  - 37
  - 38
  - 39
  - 40
  - 41
  - 42
  - 43
  - 44
  - 45
  - 46
  - 47
  - 48
  - 49
  - 50
  - 51
  - 52
  - 53
  - 54
  - 55
  - 56
  - 57
  - 58
  - 59
  - 60
33. Schomerus G, Matschinger H, Angermeyer MC. Continuum beliefs and stigmatizing attitudes towards persons with schizophrenia, depression and alcohol dependence. *Psychiatry Res* 2013;209(3):665-669.
34. Sikorski C, Luppá M, Brähler E, et al. Obese children, adults and senior citizens in the eyes of the general public: results of a representative study on stigma and causation of obesity. *PLoS One* 2012;7(10):e46924.doi:10.1371/journal.pone.0046924.
35. Bacon JG, Scheltema KE, Robinson BE. Fat phobia scale revisited: The short form. *Int J Obes* 2001;25(2):252-257.
36. Robinson BBE, Bacon JG, Reilly JO. Fat Phobia: Measuring, understanding, and changing Anti-Fat Attitudes. *Int J Eat Disord* 1993;14(4):467-480.
37. Stein J, Luppá M, Ruzanska U, et al. Measuring negative attitudes towards overweight and obesity in the German population-Psychometric properties and reference values for the German short version of the Fat Phobia Scale (FPS). *PLoS One* 2014;9(12): e114641.doi:10.1371/journal.pone.0114641.
38. Puhl RM, Luedicke J, Heuer C. Weight-based victimization toward overweight adolescents: Observations and reactions of peers. *J Sch Health* 2011;81(11):696-703.
39. Angermeyer MC, Holzinger A, Matschinger H. Emotional reactions to people with mental illness. *Epidemiol Psychiatr Sci* 2010;19(1):26-32.
40. Link BG, Cullen FT, Wozniak JF. The social rejection of former mental patients: understanding why labels matter. *Am J Sociol* 1987;92(6):1461-500.
41. Bogardus E. Measuring social distance. *J Appl Sociol* 1925;9:299-308.
42. IBM. SPSS Statistics for Windows. Armonk, NY: IBM Corp. 2013.
43. International Labour Office. International Standard Classification of Occupations: ISCO-08 [Internet]. [http://www.ilo.org/wcmsp5/groups/public/---dgreports/---dcomm/--publ/documents/publication/wcms\\_172572.pdf](http://www.ilo.org/wcmsp5/groups/public/---dgreports/---dcomm/--publ/documents/publication/wcms_172572.pdf). Last accessed January 9, 2018.
44. Statistisches Jahrbuch 2016 [Internet]. [https://www.destatis.de/DE/Publikationen/StatistischesJahrbuch/StatistischesJahrbuch2016.pdf?\\_\\_blob=publicationFile](https://www.destatis.de/DE/Publikationen/StatistischesJahrbuch/StatistischesJahrbuch2016.pdf?__blob=publicationFile). Last accessed August 28, 2018.
45. Statistisches Bundesamt 2016. [Internet] [https://www.destatis.de/DE/ZahlenFakten/GesellschaftStaat/Bevoelkerung/Bevoelkerungsstand/Tabellen/Zensus\\_Geschlecht\\_Staatsangehoerigkeit.html](https://www.destatis.de/DE/ZahlenFakten/GesellschaftStaat/Bevoelkerung/Bevoelkerungsstand/Tabellen/Zensus_Geschlecht_Staatsangehoerigkeit.html). Last accessed August 28, 2018.
46. Crenshaw K. Demarginalizing the intersection of race and sex: a black feminist critique of antidiscrimination doctrine, feminist theory and antiracist politics. *Univ Chic Leg Forum* 1989;139:139-167.
47. Harris MB, Harris RJ, Bochner, S. Fat, four-eyed, and female: stereotypes of obesity, glasses, and gender. *J Appl Soc Psychol* 1982;12(6):503-516.
48. Brennan MA, Lalonde CE, Bain JL. Body image perceptions: do gender differences exist? *Psy Chi J Undergrad Res* 2010;15(3):130-138.
49. Grossbard JR, Neighbors C, Larimer ME. Perceived norms for thinness and muscularity among college students: what do men and women really want? *Eat Behav*

1  
2  
3 2011;12(3):192-199.

- 4 50. Boswell RG, White MA. Gender differences in weight bias internalisation and eating  
5 pathology in overweight individuals. *Adv Eat Disord* 2015;3(3):259-268.  
6  
7 51. Briggs SR, Cheek JM. The role of factor analysis in the development and evaluation of  
8 personality scales. *J Pers* 1986;54(1):106-148.  
9

10  
11  
12  
13  
14  
15  
16  
17  
18  
19  
20  
21  
22  
23  
24  
25  
26  
27  
28  
29  
30  
31  
32  
33  
34  
35  
36  
37  
38  
39  
40  
41  
42  
43  
44  
45  
46  
47  
48  
49  
50  
51  
52  
53  
54  
55  
56  
57  
58  
59  
60

For peer review only

## APPENDIX

### Female vignettes

Diana D. is a lawyer and 46 years old. With a height of 5'5 and a weight of 200 pounds, she is severely overweight.

Diana D. is a cleaner and 46 years old. With a height of 5'5 and a weight of 200 pounds, she is severely overweight.

### Male vignettes

John D. is a lawyer and 46 years old. With a height of 5'9 and a weight of 230 pounds, he is severely overweight.

John D. is a janitor and 46 years old. With a height of 5'9 and a weight of 230 pounds, he is severely overweight.

STROBE Statement—Checklist of items that should be included in reports of *cross-sectional studies*

|                           | Item No | Recommendation                                                                                                                                                                                    | Page                                     |
|---------------------------|---------|---------------------------------------------------------------------------------------------------------------------------------------------------------------------------------------------------|------------------------------------------|
| <b>Title and abstract</b> | 1       | (a) Indicate the study's design with a commonly used term in the title or the abstract                                                                                                            | 2                                        |
|                           |         | (b) Provide in the abstract an informative and balanced summary of what was done and what was found                                                                                               | 2                                        |
| <b>Introduction</b>       |         |                                                                                                                                                                                                   |                                          |
| Background/rationale      | 2       | Explain the scientific background and rationale for the investigation being reported                                                                                                              | 5                                        |
| Objectives                | 3       | State specific objectives, including any prespecified hypotheses                                                                                                                                  | 5                                        |
| <b>Methods</b>            |         |                                                                                                                                                                                                   |                                          |
| Study design              | 4       | Present key elements of study design early in the paper                                                                                                                                           | 6,7                                      |
| Setting                   | 5       | Describe the setting, locations, and relevant dates, including periods of recruitment, exposure, follow-up, and data collection                                                                   | 6                                        |
| Participants              | 6       | (a) Give the eligibility criteria, and the sources and methods of selection of participants                                                                                                       | 6                                        |
| Variables                 | 7       | Clearly define all outcomes, exposures, predictors, potential confounders, and effect modifiers. Give diagnostic criteria, if applicable                                                          | 7,8                                      |
| Data sources/ measurement | 8*      | For each variable of interest, give sources of data and details of methods of assessment (measurement). Describe comparability of assessment methods if there is more than one group              | 7,8                                      |
| Bias                      | 9       | Describe any efforts to address potential sources of bias                                                                                                                                         | 6,8                                      |
| Study size                | 10      | Explain how the study size was arrived at                                                                                                                                                         | 6                                        |
| Quantitative variables    | 11      | Explain how quantitative variables were handled in the analyses. If applicable, describe which groupings were chosen and why                                                                      | 7,8                                      |
| Statistical methods       | 12      | (a) Describe all statistical methods, including those used to control for confounding                                                                                                             | 8                                        |
|                           |         | (b) Describe any methods used to examine subgroups and interactions                                                                                                                               | 8                                        |
|                           |         | (c) Explain how missing data were addressed                                                                                                                                                       | 8                                        |
|                           |         | (d) If applicable, describe analytical methods taking account of sampling strategy                                                                                                                | -                                        |
|                           |         | (e) Describe any sensitivity analyses                                                                                                                                                             | -                                        |
| <b>Results</b>            |         |                                                                                                                                                                                                   |                                          |
| Participants              | 13*     | (a) Report numbers of individuals at each stage of study—eg numbers potentially eligible, examined for eligibility, confirmed eligible, included in the study, completing follow-up, and analysed | 6,9                                      |
|                           |         | (b) Give reasons for non-participation at each stage                                                                                                                                              | 6                                        |
|                           |         | (c) Consider use of a flow diagram                                                                                                                                                                | -                                        |
| Descriptive data          | 14*     | (a) Give characteristics of study participants (eg demographic, clinical, social) and information on exposures and potential confounders                                                          | Table 1                                  |
|                           |         | (b) Indicate number of participants with missing data for each variable of interest                                                                                                               | Table 2<br>Table 3<br>Table 4<br>Table 5 |



|                          |     |                                                                                                                                                                                                              |                                          |
|--------------------------|-----|--------------------------------------------------------------------------------------------------------------------------------------------------------------------------------------------------------------|------------------------------------------|
| Outcome data             | 15* | Report numbers of outcome events or summary measures                                                                                                                                                         | Table 2<br>Table 3<br>Table 4<br>Table 5 |
| Main results             | 16  | (a) Give unadjusted estimates and, if applicable, confounder-adjusted estimates and their precision (eg, 95% confidence interval). Make clear which confounders were adjusted for and why they were included | Table 2<br>Table 3<br>Table 4<br>Table 5 |
|                          |     | (b) Report category boundaries when continuous variables were categorized                                                                                                                                    | -                                        |
|                          |     | (c) If relevant, consider translating estimates of relative risk into absolute risk for a meaningful time period                                                                                             | -                                        |
| Other analyses           | 17  | Report other analyses done—eg analyses of subgroups and interactions, and sensitivity analyses                                                                                                               | 15,16                                    |
| <b>Discussion</b>        |     |                                                                                                                                                                                                              |                                          |
| Key results              | 18  | Summarise key results with reference to study objectives                                                                                                                                                     | 15,16                                    |
| Limitations              | 19  | Discuss limitations of the study, taking into account sources of potential bias or imprecision. Discuss both direction and magnitude of any potential bias                                                   | 16,17                                    |
| Interpretation           | 20  | Give a cautious overall interpretation of results considering objectives, limitations, multiplicity of analyses, results from similar studies, and other relevant evidence                                   | 16,17                                    |
| Generalisability         | 21  | Discuss the generalisability (external validity) of the study results                                                                                                                                        | 17                                       |
| <b>Other information</b> |     |                                                                                                                                                                                                              |                                          |
| Funding                  | 22  | Give the source of funding and the role of the funders for the present study and, if applicable, for the original study on which the present article is based                                                | 18                                       |

\*Give information separately for exposed and unexposed groups.

**Note:** An Explanation and Elaboration article discusses each checklist item and gives methodological background and published examples of transparent reporting. The STROBE checklist is best used in conjunction with this article (freely available on the Web sites of PLoS Medicine at <http://www.plosmedicine.org/>, Annals of Internal Medicine at <http://www.annals.org/>, and Epidemiology at <http://www.epidem.com/>). Information on the STROBE Initiative is available at [www.strobe-statement.org](http://www.strobe-statement.org).

# BMJ Open

## Social deprivation, gender and obesity: multiple stigma? Results of a population survey from Germany

|                                 |                                                                                                                                                                                                                                                                                                                                                                                                                                                                |
|---------------------------------|----------------------------------------------------------------------------------------------------------------------------------------------------------------------------------------------------------------------------------------------------------------------------------------------------------------------------------------------------------------------------------------------------------------------------------------------------------------|
| Journal:                        | <i>BMJ Open</i>                                                                                                                                                                                                                                                                                                                                                                                                                                                |
| Manuscript ID                   | bmjopen-2018-023389.R2                                                                                                                                                                                                                                                                                                                                                                                                                                         |
| Article Type:                   | Research                                                                                                                                                                                                                                                                                                                                                                                                                                                       |
| Date Submitted by the Author:   | 17-Jan-2019                                                                                                                                                                                                                                                                                                                                                                                                                                                    |
| Complete List of Authors:       | Makowski, Anna; University Medical Center Hamburg-Eppendorf, Department of Medical Sociology<br>Kim, Tae; University Medical Center Hamburg-Eppendorf, Department of Medical Sociology<br>Luck-Sikorski, Claudia; SRH University of Applied Health Sciences; University of Leipzig, Integrated Research and Treatment Center (IFB) Adiposity Diseases<br>von dem Knesebeck, Olaf; University Medical Center Hamburg-Eppendorf, Department of Medical Sociology |
| <b>Primary Subject Heading</b>: | Sociology                                                                                                                                                                                                                                                                                                                                                                                                                                                      |
| Secondary Subject Heading:      | Sociology                                                                                                                                                                                                                                                                                                                                                                                                                                                      |
| Keywords:                       | multiple stigma, obesity, Germany, socioeconomic status, gender                                                                                                                                                                                                                                                                                                                                                                                                |
|                                 |                                                                                                                                                                                                                                                                                                                                                                                                                                                                |

SCHOLARONE™  
Manuscripts

1  
2  
3 **1 Social deprivation, gender and obesity: multiple stigma? Results**  
4  
5  
6 **2 of a population survey from Germany**  
7

8  
9 Anna C. Makowski<sup>1</sup>, Tae Jun Kim\*<sup>1</sup>, Claudia Luck-Sikorski<sup>2,3</sup>, Olaf von dem Knesebeck<sup>1</sup>  
10

11  
12  
13 <sup>1</sup>*Department of Medical Sociology, University Medical Center Hamburg-Eppendorf,*  
14 *Martinistrasse 52, 20146 Hamburg, Germany*  
15

16 <sup>2</sup>*Integrated Research and Treatment Center (IFB) Adiposity Diseases, University of Leipzig,*  
17 *Philipp-Rosenthal-Str. 27, 04103 Leipzig, Germany*  
18

19 <sup>3</sup>*SRH University of Applied Health Sciences, Neue Str. 28-30, 07548 Gera, Germany*  
20

21  
22 E-mail: t.kim@uke.uni-hamburg.de

23 \*Corresponding author  
24  
25  
26  
27  
28  
29  
30  
31  
32  
33  
34  
35  
36  
37  
38  
39  
40  
41  
42  
43  
44  
45  
46  
47  
48  
49  
50  
51  
52  
53  
54  
55  
56  
57  
58  
59  
60

Word count: 3863

# 1 **Social deprivation, gender and obesity: multiple stigma? Results of** 2 **a population survey from Germany**

3 **Objectives:** Individuals with obesity are subject to stigmatization, resulting in discrimination.  
4 Studies focusing on obesity stigma often do not account for social conditions that also may be  
5 associated with stigmatization. Following an intersectional approach, social categories such as  
6 gender and socio-economic status (SES) can interact and form a basis for multiple stigma. The  
7 present study analyses differences in public obesity stigma depending on gender and SES, as  
8 well as possible interdependencies between these social categories.

9 **Design:** Representative cross-sectional telephone survey.

10 **Participants:** 692 randomly selected adults ( $\geq 18$  years) in Germany.

11 **Methods:** Different vignettes were presented, depicting a lawyer (male/female) or a  
12 janitor/cleaner (male/female) with obesity. Following the vignette, different components of  
13 stigma were assessed: (1) fat phobia, (2) emotional reactions to a person with obesity, and (3)  
14 desire for social distance. Associations between gender, SES, and stigma components were  
15 tested in multiple linear regression analyses.

16 **Results:** A low SES in the obesity vignette (janitor/cleaner) was significantly associated with  
17 higher fat phobia scores as well as desire for social distance, compared to the vignette with a  
18 person with obesity and a high SES (lawyer). Being a male with obesity was significantly  
19 associated with more pronounced negative emotional reactions and greater desire for social  
20 distance. There were no significant interaction effects between gender and SES.

21 **Conclusions:** Results support the hypothesis of multiple stigma. Being male or of low SES was  
22 significantly associated with more pronounced negative attitudes in the German public.  
23 Following the concept of intersectionality, our findings indicate that obesity stigma can  
24 exacerbate pre-existing inequalities. This needs to be considered in development and  
25 implementation of prevention and anti-stigma measures.

26 **Keywords:** stigma; multiple stigma; attitudes; obesity; Germany; differences; socioeconomic  
27 status; occupational position; gender

28

29

## 1 **STRENGTHS AND LIMITATIONS OF THIS STUDY**

- 2 • This is the first study analyzing socio-economic status (SES) and gender in the context of  
3 public obesity stigma.
- 4 • Analyses are based on a national telephone survey not only relying on landline but also  
5 including mobile-only users all over Germany.
- 6 • Pre-recorded audio vignettes were used to identify additional stigma effects. To test for a  
7 separation of obesity stigma from the stigma associated with gender and SES, a neutral  
8 control vignette would have been necessary.
- 9 • Although vignettes are a frequently used method in stigma research, they need to be short  
10 and bear the risk of not conveying a holistic picture of an individual with obesity and  
11 different social characteristics.

## 1 INTRODUCTION

2 The proportion of people who are overweight or live with obesity has increased continuously  
3 over the past decades.[1] In Germany, the current Health Interview and Examination Survey  
4 for Adults reports a prevalence rate of obesity (defined as Body Mass Index (BMI)  $\geq 30\text{kg/m}^2$ )  
5 of approximately 24%.[2] The etiology of obesity is multi-faceted, different factors such as  
6 behavioral, biological, psychosocial, context-related or prenatal conditions concur.[3]  
7 However, poor diet and sedentary behavior are often erroneously seen as the primary reason  
8 for overweight.[4] This in turn lays the focus on individual responsibility and fosters public  
9 stereotypes of laziness and weak will. According to attribution theory, believing the condition  
10 to be under a person's control determines greater stigmatizing reactions.[5] The public  
11 misconception of causes of overweight and obesity is common and contributes to the expression  
12 of obesity stigma.[6] Individuals with overweight or obesity display a physical 'mark' that sets  
13 them apart from others. Link and Phelan [7] have provided a process model, in which stigma is  
14 conceptualized as several distinct, but interrelated steps: differences between social groups are  
15 distinguished and *labeled*. These labels are linked to *stereotypes* (undesired characteristics) that  
16 form the basis of a *separation* of 'us' and 'them'. Thusly-labeled individuals experience *status*  
17 *loss* and *discrimination* in a context in which power is exercised.

18 There is a public recognition of obesity as a chronic condition and it is a classified disease in  
19 some countries (but not Germany).[8] Nevertheless, individuals with obesity experience  
20 discrimination in daily life, which in turn reinforces negative stereotypes and stigmatizing  
21 processes.[7] Ascribing negative attributes such as unintelligent, lack of self-discipline or  
22 emotionally instable [9,10] to persons who are obese, activates processes that result in  
23 discrimination in different settings. This could be shown for the education and employment  
24 sector as well as personal relationships.[10] Furthermore, stigmatizing attitudes and  
25 discrimination are present in the health care sector, possibly leading to the avoidance of  
26 necessary treatment.[11] The adverse health consequences of obesity stigma have been shown  
27 on psychological (e.g. depression, self-esteem) and physical (eating behavior, physical activity,  
28 cardiovascular health outcomes) levels.[10]

29 One German study found that about one fourth of the general public displays stigmatizing  
30 attitudes regarding the 'Weight Control/Blame' subscale from the Antifat Attitudes Test.[12]  
31 High levels of responsibility for becoming obese are attributed to the individual, which is  
32 associated with the belief that the individual should be liable for treatment costs to a great  
33 extent.[13] Sikorski et al. examined emotional reactions and social distance towards individuals

1  
2  
3 1 with obesity and found that the most rejected domains were personal ability as well as social  
4 2 interaction.[14]

5  
6  
7 3 In terms of gender differences, studies reported higher weight bias internalization [15] and  
8 4 greater risk for weight/height discrimination [16] among women. In children and adolescents,  
9 5 girls with overweight have been found to be subject to teasing and social  
10 6 marginalization.[17,18] Similar results are presented by Fikkan and Rothblum,[19] who found  
11 7 women with obesity to be more stigmatized in education and employment sectors than men.  
12 8 However, gender differences in obesity stigma have rarely been examined, and results are not  
13 9 consistent.[20]

14  
15  
16 10 In recent years, stigma research has paid increased attention to multiple social identities and  
17 11 their interaction to influence stigmatization. This intersectional approach allows examining how  
18 12 multiple social categories, e.g. being categorized as 'female', 'black' or both, interact to  
19 13 produce or protect against health risks or discrimination.[15] This may be referred to as  
20 14 'multiple stigma' [21] or 'double disadvantage'. [22] These concepts suggest that a person can  
21 15 belong to different, possibly stigmatized social groups which exerts cumulative effects.[23]  
22 16 When it comes to obesity stigma at the intersection of gender and race, few studies have been  
23 17 conducted and results were inconsistent. Himmelstein et al. [15] found no divergences in  
24 18 obesity stigma according to race or gender, whereas Puhl et al. found that African American  
25 19 females with obesity evoked higher ratings of dislike and social distance than Caucasian  
26 20 females with obesity.[24] It has been postulated by Gray that severe and extreme obesity  
27 21 compound pre-existing socioeconomic inequalities in context of vulnerability.[25] However, to  
28 22 date no study has focused on the possible additive or multiple effects of gender and socio-  
29 23 economic status (SES) in the context of obesity stigma. This is astonishing, as there are socio-  
30 24 economic inequalities in the prevalence of obesity.[26] This also holds true for Germany, where  
31 25 obesity is more common among children and adults who are of low SES. Women in this group  
32 26 appear to be excessively affected by obesity.[27]

33  
34  
35 27 Against this background, we analyze differences in public stigma towards low vs. high SES  
36 28 persons as well as female vs. male persons with obesity. By incorporating the interaction of  
37 29 gender x SES, we additionally examine possible interdependencies and their associations with  
38 30 obesity stigma.

39  
40  
41 31

## 42 32 **METHODS**

## 1 **Study design and sample**

2 Analyses are based on a national telephone survey (computer assisted telephone interview  
3 (CATI)), conducted between March and April 2017. The sampling was based on data of the  
4 Association of German Market and Social Research (ADM), which includes registered as well  
5 as non-registered telephone numbers via random digital dialing. Already in 2010, around 13%  
6 of adults (age 16 years and older) in Germany did not have access to landline and solely used a  
7 mobile phone.[28] As this proportion has increased since 2010 and in order to increase the  
8 probability to reach persons who are rarely at home, a share of 30% mobile numbers was  
9 incorporated in the initial sample. To ensure a sample representative of the German population,  
10 all regions in Germany were included.

11 Regarding mobile numbers, target persons were the owner or main user of the mobile phone.  
12 The connection was considered a neutral drop-out if the respondent was younger than 18 years.  
13 In households that were contacted via landline, the Kish-Selection-Grid [29] was applied to  
14 randomly select a person from this household. The interviewer collected the age and gender of  
15 everyone in the household that was eligible for the survey and then randomly selected one  
16 person from that list. At the start of the interview, respondents were informed that the survey's  
17 focus was on nutrition, health, and wellbeing.

18 The overall sample of this study consisted of 1,401 persons. To obtain this number, 2,849  
19 people were randomly selected (net sample). Of these, 862 persons (30.25%) refused to  
20 participate in the interview. Further 586 persons (20.57%) could not be reached. This led to a  
21 total response rate of 49.18%. Previous telephone interview studies have reached similar rates  
22 [30,31] and the response can be regarded satisfactory for telephone surveys in Germany.[32] In  
23 the study, eight different vignettes were used. The present analyses focus on four vignettes  
24 depicting a lawyer (male/female) or a janitor/cleaner (male/female) with obesity, resulting in a  
25 subsample of n=692 under study.

26 The Ethics Commission of the Medical Association in Hamburg approved this study (No.  
27 PV5421). Since the interviews were telephone-based, the respondents were verbally informed  
28 about the study and asked for consent to participate. Participants' consent and refusal were  
29 documented. As we used data from a population survey, patients were not involved in the  
30 development and design of the research question and the study.

## 31 **Instruments**

32 *Vignette manipulation*



1  
2  
3 1 Vignettes have been frequently applied in the social sciences to investigate attitudes or intended  
4 behavior.[33] In stigma research, they have been used to convey realistic pictures of an  
5 2 individual, e.g. with depression, schizophrenia, or obesity.[34,35]  
6 3  
7  
8

9 4 In the present study, all pre-recorded audio vignettes conveyed the same information, while two  
10 5 characteristics were varied: gender (female/male) and occupational position as an indicator of  
11 6 SES (low = janitor or cleaner / high = lawyer). This resulted in four different case stories that  
12 7 described an individual with obesity (please see appendix). One vignette was randomly  
13 8 assigned to each respondent, resulting in about 175 respondents per vignette. Weight and height  
14 9 were stated, yielding a BMI of approximately 32 kg/m<sup>2</sup>. This was further emphasized by the  
15 10 comment that the person 'is severely overweight'. A trained speaker audio-recorded the case  
16 11 stories. To neutralize possible interviewer effects, the files were directly played to the  
17 12 respondents from the computer via telephone line. Preceding the presentation of the vignette,  
18 13 there was a set of questions related to respondents' own experience with overweight. This was  
19 14 self-reported weight and height, if the respondent has ever been overweight, tried to lose weight  
20 15 or has personal contact to persons with obesity.  
21  
22  
23  
24  
25  
26  
27  
28  
29

### 30 16 *Obesity stigma*

31  
32 17 To assess stigmatizing attitudes toward the person described in the vignette, the short form of  
33 18 the *Fat Phobia Scale (FPS)* by Bacon et al. [36] was used. This comprised 14 items of the  
34 19 original 50-item scale.[37] The short version demonstrated excellent reliability and was  
35 20 strongly correlated with the long form. Moreover, the 14-item-scale accounted for the largest  
36 21 amount of variance in factor analysis.[36] On a 5-point semantic differential scale, 14 pairs of  
37 22 adjectives are introduced that capture common beliefs about people who are obese. The FPS  
38 23 short form has been translated and applied in German by Luck-Sikorski and colleagues.[35]  
39 24 Principal component analysis with varimax rotation yielded a 4-factorial solution, with the  
40 25 eigenvalue of the fourth factor barely exceeding 1. Similar to a validation study for the German  
41 26 short version of the FPS, the first factor explained the greatest share of variation (25.58%,  
42 27 second factor 10.80%, third factor 8.19%, fourth factor 7.31%) which is why a one factorial  
43 28 solution is supported.[38] Following Bacon et al. [36], some items were inverted where  
44 29 necessary, so that a higher score indicates greater fat phobia. The sum score was divided by the  
45 30 number of items so that the score ranges from 1 to 5. Values < 2.5 indicate positive attitudes  
46 31 and values ≥ 2.5 represent negative attitudes toward a person with obesity.[39] Cronbach's  $\alpha$   
47 32 for the FPS was 0.77.  
48  
49  
50  
51  
52  
53  
54  
55  
56  
57  
58  
59  
60

1  
2  
3 1 Emotional reactions were assessed by nine items representing different ways of emotionally  
4 2 responding to the person described in the vignette. Six items were derived from a scale used in  
5 3 studies on mental illness stigma,[40] while three items were developed based on common  
6 4 stereotypes of obesity. The items were coded from 1 ‘completely disagree’ to 4 ‘completely  
7 5 agree’. A principal component analysis with varimax rotation yielded two different factors. The  
8 6 first factor, termed *negative emotional reactions*, was comprised of the six items ‘I react  
9 7 angrily’, ‘I feel annoyed’, ‘This triggers incomprehension with me’, ‘I feel repelled’, ‘I feel  
10 8 disgust’, and ‘I think this is unaesthetic’. The items “I feel pity”, “I feel sympathy”, and “I want  
11 9 to help” loaded on the second factor of *positive emotional reactions*. Together, the two factors  
12 10 accounted for 50.9 % of variance. Two sum scores were computed, Cronbach’s  $\alpha$  was 0.78 for  
13 11 negative (6 items), and 0.47 for positive emotional reactions (3 items).

12 12 Desire for social distance was assessed by a scale developed by Link et al.,[41] a modified  
13 13 version of the Bogardus *Social Distance Scale*. [42] The instrument contains seven items that  
14 14 represent different social relationships (e.g. neighbor, colleague, or child-carer). On a 4-point  
15 15 Likert-scale, respondents were asked to indicate to what extent they would accept the person  
16 16 described in the vignette. A principal component analysis with varimax rotation was carried  
17 17 out; yielding a single factor that explained 55.1 % of variance. Cronbach’s  $\alpha$  was 0.86. Again,  
18 18 a sum score was computed, with higher scores indicating greater desire for social distance.

### 19 **Statistical analyses**

20 20 The analyses were performed using SPSS 22.[43] To test for significant mean differences  
21 21 between groups regarding single items and scales, Mann-Whitney-U tests were applied. This  
22 22 non-parametric test was conducted, since Kolmogorow-Smirnow-Tests revealed that responses  
23 23 to the stigma items did not follow a normal distribution. Determinants of stigmatizing attitudes  
24 24 were introduced into multiple linear regression models. We analyzed two main effects  
25 25 presented in the vignette: SES (janitor or cleaner/lawyer) and gender (female/male). To take  
26 26 into account possible interdependencies, the interaction effect of SES x gender was also  
27 27 introduced into the models. All models were controlled for respondents’ characteristics. Age  
28 28 and BMI were entered as continuous variables. The respondents’ occupational position was  
29 29 expressed in skill levels according to the International Standard Classification of Occupation  
30 30 (ISCO-08).[44] Other variables were the respondents’ gender and personal contact to  
31 31 individuals who are obese.

1  
2  
3 1 In all analyses, the response options ‘prefer not to say’ and ‘don’t know’ were treated as missing  
4 values. Exact p values are reported. In view of the number of tests, values of  $p < 0.01$  were  
5 2 regarded as statistically significant.  
6 3  
7  
8  
9  
10

## 11 4 **RESULTS**

12  
13 5 Sociodemographic characteristics of the analyzed sample are briefly presented in table 1. The  
14 6 male:female ratio is relatively even, which is similar to the general adult population in Germany  
15 7 according to the official statistics [45]. In terms of age, people aged 25 to 39 are  
16 8 underrepresented and people aged 60 to 64 are overrepresented in the sample compared to the  
17 9 distribution in the official statistics [46]. Almost half of the respondents work in occupational  
18 10 positions that are regarded skill level 2 when referring to ISCO.[43] Regarding weight status,  
19 11 more than 50% of the respondents reported overweight or obesity. The share of those with  
20 12 overweight/obesity corresponds to numbers obtained by other representative studies in  
21 13 Germany.[2] The vast majority (84.4%) has or had personal contact to someone who is  
22 14 overweight.  
23  
24  
25  
26  
27  
28  
29  
30  
31  
32  
33  
34  
35  
36  
37  
38  
39  
40  
41  
42  
43  
44  
45  
46  
47  
48  
49  
50  
51  
52  
53  
54  
55  
56  
57  
58  
59  
60

1 **Table 1** Sociodemographic characteristics and weight status of the sample (n=627-692)

|                                                                            |             |
|----------------------------------------------------------------------------|-------------|
| <b>Gender</b> (female)                                                     | 48.9%       |
| <b>Mean age</b> (standard deviation)                                       | 50.9 (18.0) |
| <b>Age groups</b>                                                          |             |
| 18 - ≤ 24 years                                                            | 8.1%        |
| 25 - ≤ 39 years                                                            | 20.0%       |
| 40 - ≤ 59 years                                                            | 35.1%       |
| 60 - ≤ 64 years                                                            | 12.6%       |
| ≥ 65 years                                                                 | 24.2%       |
| <b>Occupational position</b> (ISCO-08)                                     |             |
| Skill level 1: <i>Simple/routine physical or manual tasks</i>              | 7.0%        |
| Skill level 2: <i>Operating machinery and electronic equipment</i>         | 45.5%       |
| Skill level 3: <i>Complex technical and practical tasks</i>                | 27.1%       |
| Skill level 4: <i>Complex problem-solving, decision-making, creativity</i> | 20.3%       |
| <b>Weight status according to BMI</b>                                      |             |
| <i>Underweight</i> (≤ 18.49)                                               | 2.1%        |
| <i>Normal weight</i> (18.50 – 24.99)                                       | 42.5%       |
| <i>Overweight</i> (25.00 – 29.99)                                          | 34.2%       |
| <i>Obese</i> (≥ 30.00)                                                     | 21.2%       |
| <b>Contact to someone who is overweight</b> (yes)                          | 84.4%       |

2  
3  
4  
5  
6  
7  
8  
9  
10  
11  
12  
13  
14  
15  
16  
17  
18  
19  
20  
21  
22  
23  
24  
25  
26  
27  
28  
29  
30  
31  
32  
33  
34  
35  
36  
37  
38  
39  
40  
41  
42  
43  
44  
45  
46  
47  
48  
49  
50  
51  
52  
53  
54  
55  
56  
57  
58  
59  
60

In tables 2-4, differences in the mean stigma values depending on SES and gender presented in the vignette are reported. Regarding the fat phobia items, the adjective low self-esteem was ascribed to the female vignette significantly more often (respective means were 3.10 for the female vignette and 2.83 for the male vignette, table 2). In contrast, lazy, slow, and self-indulgent were significantly more often attributed to the male vignette. Comparing low and high SES, a homogenous picture emerged. A low SES was significantly associated with greater negative attitudes, expressing individual responsibility (no willpower, poor self-control, weak) as well as insecurity and low self-esteem when compared to high SES.

**Table 2** Fat phobia (FPS, single items and scale); differences according to gender and socio-economic status (SES) in the vignette (mean values (standard deviation))

| Pair of adjectives                                           | Gender                |                     |                | SES                                   |                               | p*             |
|--------------------------------------------------------------|-----------------------|---------------------|----------------|---------------------------------------|-------------------------------|----------------|
|                                                              | Female<br>(n=337-348) | Male<br>(n=306-316) | p*             | Low<br>Janitor/cleaner<br>(n=317-327) | High<br>Lawyer<br>(n=326-337) |                |
| <i>Industrious ... lazy</i> <sup>1</sup>                     | 2.55 (0.92)           | 2.83 (0.81)         | < <b>0.001</b> | 2.68 (0.87)                           | 2.69 (0.89)                   | 0.667          |
| <i>Has willpower ... no willpower</i> <sup>1</sup>           | 3.28 (0.97)           | 3.21 (1.04)         | 0.602          | 3.48 (0.98)                           | 3.03 (0.97)                   | < <b>0.001</b> |
| <i>Attractive ... unattractive</i> <sup>1</sup>              | 3.33 (1.00)           | 3.42 (0.94)         | 0.160          | 3.43 (1.05)                           | 3.32 (0.90)                   | 0.149          |
| <i>Good self-control ... poor self-control</i> <sup>1</sup>  | 3.10 (1.03)           | 3.17 (0.98)         | 0.440          | 3.30 (0.99)                           | 2.97 (1.00)                   | < <b>0.001</b> |
| <i>Fast ... slow</i> <sup>1</sup>                            | 3.25 (1.01)           | 3.47 (0.99)         | <b>0.002</b>   | 3.32 (1.06)                           | 3.39 (0.96)                   | 0.592          |
| <i>Having endurance ... having no endurance</i> <sup>1</sup> | 3.41 (1.13)           | 3.37 (1.04)         | 0.297          | 3.39 (1.10)                           | 3.40 (1.07)                   | 0.688          |
| <i>Active ... inactive</i> <sup>1</sup>                      | 3.36 (0.98)           | 3.38 (1.06)         | 0.328          | 3.38 (1.06)                           | 3.35 (0.97)                   | 0.650          |
| <i>Strong ... weak</i> <sup>1</sup>                          | 3.15 (0.99)           | 3.18 (1.02)         | 0.914          | 3.33 (1.03)                           | 3.01 (0.94)                   | < <b>0.001</b> |
| <i>Self-sacrificing ... self-indulgent</i> <sup>1</sup>      | 3.19 (0.91)           | 3.41 (0.86)         | < <b>0.001</b> | 3.32 (0.90)                           | 3.28 (0.89)                   | 0.375          |
| <i>Dislikes food ... likes food</i>                          | 4.05 (0.88)           | 4.15 (0.90)         | 0.093          | 4.08 (0.90)                           | 4.12 (0.88)                   | 0.584          |
| <i>Shapely ... shapeless</i> <sup>1</sup>                    | 3.41 (1.15)           | 3.21 (1.17)         | 0.098          | 3.40 (1.16)                           | 3.31 (1.17)                   | 0.753          |
| <i>Undereats ... overeats</i> <sup>1</sup>                   | 3.87 (0.91)           | 3.95 (0.90)         | 0.306          | 3.91 (0.93)                           | 3.90 (0.89)                   | 0.883          |
| <i>Secure ... insecure</i> <sup>1</sup>                      | 3.01 (1.06)           | 2.81 (1.03)         | 0.027          | 3.24 (1.02)                           | 2.61 (0.98)                   | < <b>0.001</b> |
| <i>High self-esteem ... low self-esteem</i> <sup>1</sup>     | 3.10 (1.05)           | 2.83 (1.05)         | < <b>0.001</b> | 3.28 (1.00)                           | 2.67 (1.02)                   | < <b>0.001</b> |
| <b>FPS</b> <sup>1</sup>                                      | 3.31 (0.48)           | 3.32 (0.50)         | 0.995          | 3.40 (0.51)                           | 3.22 (0.46)                   | < <b>0.001</b> |

<sup>1</sup>Semantic differential scales and mean FPS ranging from 1 to 5, values > 2.50 indicate greater fat phobia; \*Mann-Whitney-U test

Regarding emotional reactions (table 3), the comparison of gender in the vignette showed that males with obesity evoked significantly more negative emotional reactions on four out of six items as well as on the subscale for negative emotions (respective means were 9.67 for the female vignette and 10.54 for the male vignette). In terms of SES, a cleaner/janitor with obesity evoked significantly more feelings of anger but also more positive emotional reactions, compared to a lawyer with obesity.

**Table 3** Emotional reactions (single items and scales); differences according to gender and socio-economic status (SES) in the vignette (mean values (standard deviation))

|                                                 | Gender                |                     | p*             | SES                                   |                               | p*           |
|-------------------------------------------------|-----------------------|---------------------|----------------|---------------------------------------|-------------------------------|--------------|
|                                                 | Female<br>(n=327-350) | Male<br>(n=293-315) |                | Low<br>Janitor/cleaner<br>(n=299-326) | High<br>Lawyer<br>(n=321-338) |              |
| <i>Annoyed</i> <sup>1</sup>                     | 1.56 (0.72)           | 1.59 (0.70)         | 0.290          | 1.65 (0.79)                           | 1.50 (0.62)                   | 0.056        |
| <i>Angry</i> <sup>1</sup>                       | 1.36 (0.64)           | 1.55 (0.71)         | < <b>0.001</b> | 1.52 (0.71)                           | 1.38 (0.64)                   | <b>0.005</b> |
| <i>Incomprehension</i> <sup>1</sup>             | 1.88 (0.89)           | 2.04 (0.83)         | <b>0.006</b>   | 2.05 (0.87)                           | 1.87 (0.85)                   | 0.012        |
| <i>Revolted</i> <sup>1</sup>                    | 1.46 (0.69)           | 1.67 (0.75)         | < <b>0.001</b> | 1.62 (0.78)                           | 1.50 (0.67)                   | 0.114        |
| <i>Disgust</i> <sup>1</sup>                     | 1.41 (0.66)           | 1.53 (0.66)         | <b>0.002</b>   | 1.51 (0.69)                           | 1.42 (0.94)                   | 0.078        |
| <i>Unaesthetic</i> <sup>1</sup>                 | 2.01 (0.94)           | 2.15 (0.87)         | 0.022          | 2.08 (0.87)                           | 2.07 (0.95)                   | 0.919        |
| Negative emotional reactions scale <sup>2</sup> | 9.67 (3.06)           | 10.54 (3.24)        | <b>0.001</b>   | 10.43 (3.23)                          | 9.74 (3.05)                   | 0.012        |
| <i>Sympathy</i> <sup>1</sup>                    | 2.58 (0.81)           | 2.53 (0.78)         | 0.769          | 2.54 (0.82)                           | 2.57 (0.77)                   | 0.884        |
| <i>Pity</i> <sup>1</sup>                        | 2.24 (0.94)           | 2.09 (0.90)         | 0.020          | 2.23 (0.92)                           | 2.11 (0.92)                   | 0.034        |
| <i>Want to help</i> <sup>1</sup>                | 2.20 (0.93)           | 2.26 (0.86)         | 0.414          | 2.34 (0.93)                           | 2.12 (0.85)                   | 0.011        |
| Positive emotional reactions scale <sup>3</sup> | 6.97 (1.96)           | 6.86 (1.74)         | 0.692          | 7.08 (2.01)                           | 6.97 (1.96)                   | <b>0.004</b> |

<sup>1</sup>Single items ranging from 1 to 4; <sup>2</sup>Negative emotional reaction scales comprised of six items; sum scale ranging from 6 to 24; <sup>3</sup>Positive emotional reaction scale comprised of three items; sum scale ranging from 3 to 12; \*Mann-Whitney-U test

A consistent picture emerged when comparing desire for social distance according to the person's gender in the vignette (table 4). Males with obesity were met with significantly greater levels of rejection in most aspects of social distance. Gender difference was also significant for the desire for social distance scale (13.15 for males and 11.66 for females). Similarly, a person with obesity and a low SES evoked greater desire for social distance concerning four of seven items. Also, the desire for social distance scale significantly differed between the SES vignettes (13.03 for low SES and 11.72 for high SES).

**Table 4** Desire for social distance (single items and scale); differences according to gender and socio-economic status (SES) in the vignette (mean values (standard deviation))

|                                       | Gender                |                     | p*             | SES                                   |                             | p*             |
|---------------------------------------|-----------------------|---------------------|----------------|---------------------------------------|-----------------------------|----------------|
|                                       | Female<br>(n=332-350) | Male<br>(n=292-312) |                | Low<br>Janitor/cleaner<br>(n=307-324) | High<br>Lawyer<br>(317-338) |                |
| <i>Tenant</i> <sup>1</sup>            | 1.71 (0.92)           | 1.96 (0.86)         | < <b>0.001</b> | 1.98 (0.98)                           | 1.68 (0.78)                 | <b>0.001</b>   |
| <i>Colleague</i> <sup>1</sup>         | 1.39 (0.57)           | 1.48 (0.61)         | 0.012          | 1.43 (0.54)                           | 1.42 (0.63)                 | 0.546          |
| <i>Neighbor</i> <sup>1</sup>          | 1.52 (0.74)           | 1.56 (0.69)         | 0.155          | 1.54 (0.71)                           | 1.54 (0.72)                 | 0.649          |
| <i>Childcare</i> <sup>1</sup>         | 1.70 (0.75)           | 1.95 (0.91)         | < <b>0.001</b> | 1.98 (0.90)                           | 1.66 (0.74)                 | < <b>0.001</b> |
| <i>In-law</i> <sup>1</sup>            | 1.79 (0.90)           | 1.90 (0.79)         | <b>0.003</b>   | 1.98 (0.89)                           | 1.71 (0.78)                 | < <b>0.001</b> |
| <i>Introduce friend</i> <sup>1</sup>  | 1.74 (0.82)           | 2.25 (0.95)         | < <b>0.001</b> | 2.08 (0.92)                           | 1.88 (0.90)                 | <b>0.008</b>   |
| <i>Recommend for job</i> <sup>1</sup> | 1.83 (0.84)           | 2.04 (0.81)         | < <b>0.001</b> | 2.03 (0.83)                           | 1.83 (0.82)                 | 0.011          |
| Desire for social distance scale      | 11.66 (4.12)          | 13.15 (4.00)        | < <b>0.001</b> | 13.03 (4.14)                          | 11.72 (4.03)                | < <b>0.001</b> |

<sup>1</sup>Single items ranging from 1 to 4; <sup>2</sup>Desire for social distance scale comprised of 7 items, sum scale ranging from 7 to 28;

\*Mann-Whitney-U test

The results of multiple linear regression analyses are reported in table 5. While controlling for respondents' characteristics, a significant main effect of SES emerged regarding fat phobia ( $\beta = 0.173$ ). Being a janitor or cleaner with obesity was associated with significantly increased fat phobia compared to lawyers. Regarding positive emotional reactions, there were no significant associations with either gender or SES. However, male persons with obesity were confronted with more negative emotional reactions than females ( $\beta = -0.151$ ). In terms of desire for social distance, both main effects were statistically significant. Being either a male or a janitor/cleaner with obesity was significantly associated with greater desire for social distance. In none of the models did the interaction effect of gender x SES attain statistical significance (table 5).

**Table 5** Linear regression analyses: associations between stigma components and socio-economic status (SES) and gender presented in the vignette

|                                                 | Fat Phobia Scale<br>(n=561) |              |                           | Positive emotional reactions<br>(n=607) |         |                   | Negative emotional reactions<br>(n=614) |               |                             | Social Distance<br>(n=608) |               |                             |
|-------------------------------------------------|-----------------------------|--------------|---------------------------|-----------------------------------------|---------|-------------------|-----------------------------------------|---------------|-----------------------------|----------------------------|---------------|-----------------------------|
|                                                 | B                           | $\beta$      | 95% CI                    | B                                       | $\beta$ | 95% CI            | B                                       | $\beta$       | 95% CI                      | B                          | $\beta$       | 95% CI                      |
| <b>Low SES vignette</b><br>(ref. lawyer)        | <b>0.171</b>                | <b>0.173</b> | <b>0.052 -<br/>0.287*</b> | 0.035                                   | 0.010   | -0.393 -<br>0.464 | 0.304                                   | 0.047         | -0.405 -<br>1.014           | <b>1.122</b>               | <b>0.135</b>  | <b>0.217 -<br/>2.026*</b>   |
| <b>Female gender in vignette</b><br>(ref. male) | -0.002                      | -0.002       | -0.115 -<br>0.112         | -0.146                                  | -0.039  | -0.556 -<br>0.264 | <b>-0.977</b>                           | <b>-0.151</b> | <b>-1.655 -<br/>-0.299*</b> | <b>-1.201</b>              | <b>-0.145</b> | <b>-2.068 -<br/>-0.334*</b> |
| <b>Interaction gender *<br/>SES in vignette</b> | -0.021                      | -0.019       | -0.182 -<br>0.139         | 0.539                                   | 0.126   | -0.048 -<br>1.125 | 0.238                                   | 0.032         | -0.730 -<br>1.205           | -0.215                     | -0.023        | -1.451 -<br>1.021           |

\*p<0.01; \*\*p<0.001; the model is adjusted for respondents' gender, age, BMI, occupational position as well as contact to an individual with obesity



## 1 DISCUSSION

2 The concept of multiple stigma suggests that a person can belong to different potentially  
3 stigmatized groups, experiencing an aggregation of disadvantages and discrimination.[23]  
4 Applying this approach to the present study, this would mean that because of their group  
5 affiliation (e.g. being female and of low SES) individuals suffer multiple stigma when  
6 confronted with the burden of obesity. Similarly, the framework of intersectionality describes  
7 the interdependent relationship between different social identities and structural inequities.[47]  
8 Multiple social categories interact and produce or protect against discrimination. In light of this,  
9 obesity stigma can reinforce pre-existing inequalities because of SES and / or gender.

10 The present study is the first to analyze the possible multiple stigma of gender, SES, and  
11 obesity. Following an intersectional approach, it was analyzed whether main effects or the  
12 interaction of social categories possibly reinforce obesity stigma, implying a double or multiple  
13 disadvantage for certain individuals. While there were no statistically significant interaction  
14 effects of categories, we found distinct differences in obesity stigma dependent on gender with  
15 regard different stigma components. Males with obesity were met with more negative emotional  
16 reactions and social distance. This contradicts some previous studies that found (young) women  
17 with overweight or obesity to be met with greater stigmatization than men.[15–19] The  
18 predominance of overly thin women in the media and the promotion of a slim beauty ideal for  
19 females can have different effects on the stigmatization of women and men with obesity.[20]  
20 Nevertheless, over the past decade, a trim and muscular male body image has come to the fore  
21 in most Western societies, shaping a new perspective on body image dissatisfaction and obesity  
22 stigma also among men.[48,49] Men have been found to be similarly stigmatized as women for  
23 being heavy,[20] and the concern about body image is associated with increased eating  
24 pathology in both men and women [50]

25 Regarding SES and obesity, the study revealed significant differences in public attitudes in  
26 several stigma components under study. Those of low SES were rated less favorably with regard  
27 to fat phobia and desire for social distance when compared to persons with high SES. On the  
28 other hand, individuals with low SES were also met with significantly greater prosocial  
29 feelings. It is possible that, next to obesity, the status of a cleaner/janitor is linked to  
30 characteristics (e.g. economic hardship) that evoke pity among respondents. After the  
31 adjustment of respondents' characteristics in the multivariate analyses (gender, age, BMI,  
32 occupational position as well as contact to an individual with obesity), however, only the  
33 associations with fat phobia and social distance were found to be significant.

1  
2  
3 1 Following the concept of intersectionality, and against the background of a disproportionate  
4 2 distribution of obesity (higher prevalence among females of low SES), one could have expected  
5 3 significant interaction effects in multivariate analyses. We were not able to verify this  
6 4 assumption. However, significant main effects of gender and SES indicate a double stigma to  
7 5 the disadvantage of males as well as individuals with a low SES who suffer from obesity.

8  
9  
10 6 Some limitations need to be mentioned and discussed when evaluating our findings. More than  
11 7 half of the individuals eligible for the study were not available or refused to participate.  
12 8 Although participation rates around 50% can be regarded satisfactory for telephone  
13 9 surveys,[32] we cannot rule out selection bias due to non-response. With respect to internal  
14 10 consistency, Cronbach's  $\alpha$  for most scales was good or acceptable. Only the subscale of positive  
15 11 emotional reactions exhibited limited reliability, which could be due to the relatively small  
16 12 number of items. In this case, it is recommended to use the mean inter-item correlation as an  
17 13 indicator for acceptability, which was 0.22 in the present sample. A satisfactory range is said  
18 14 to be 0.2 to 0.4.[51] Furthermore, no conclusions on causal relationships can be drawn as our  
19 15 data are based on a cross-sectional design. Similar to other studies in stigma research, we used  
20 16 vignettes to explore possible multiple stigma of obesity. On the one hand, these should not be  
21 17 too long. On the other hand, only varying one sentence to express different social conditions  
22 18 might have been too short to convey a holistic picture of the individual, or to be kept in mind  
23 19 throughout the whole interview. Also, vignettes had to be understandable for the general  
24 20 population. Therefore, we decided not to report the BMI and not to use the term 'obese'. In this  
25 21 regard, it can be considered a limitation that the vignettes lack medical accuracy. Moreover,  
26 22 due to time constraints, every respondent only received one vignette. The lack of a neutral  
27 23 control condition impedes the interpretation of results. For example, it remains unclear whether  
28 24 respondents associate adjectives such as low self-esteem or insecurity with the fact that the  
29 25 individual in the vignette presented with obesity or pursues the profession of a janitor when  
30 26 compared to a lawyer. This is a limitation that has to be considered when interpreting our  
31 27 findings as an indication of multiple or double stigma. Finally, sample size may have been too  
32 28 small to detect significant interaction effects.

33 29 Differences in stigma based on gender and SES indicate that obesity can exacerbate pre-existing  
34 30 inequalities. The presence of obesity stigma could be shown in many domains of daily life, e.g.  
35 31 education, work, personal, and health care.[10,11] Stigmatization is a risk factor for physical  
36 32 and psychological health problems such as depression, body dissatisfaction, and low self-  
37 33 esteem. Instead of motivating individuals to lose weight, stigma is associated with additional

1  
2  
3 1 weight gain [6] and underutilization of health care.[11] This implies a vicious circle of mutually  
4 2 reinforcing negative conditions. The manifold effects of obesity stigma require actions in all  
5 3 kinds of professional disciplines, e.g. among physicians, dieticians, and scientists in various  
6 4 fields. To counteract stigma, the topic should be the subject of discussion in obesity intervention  
7 5 measures, and anti-stigma messages have to be incorporated into obesity prevention campaigns.  
8 6 Our results underline the need to consider the social dimension of obesity stigma. In  
9 7 acknowledging the interrelation of social conditions and existing structures, future research  
10 8 should derive tailored measures to encounter obesity stigma and its related adverse physical  
11 9 and psychological health outcomes.  
12  
13  
14  
15  
16  
17  
18  
19  
20  
21  
22  
23  
24  
25  
26  
27  
28  
29  
30  
31  
32  
33  
34  
35  
36  
37  
38  
39  
40  
41  
42  
43  
44  
45  
46  
47  
48  
49  
50  
51  
52  
53  
54  
55  
56  
57  
58  
59  
60

For peer review only

1  
2  
3 **1 DECLARATIONS**  
4

5 **2 *Ethical approval***  
6

7  
8 3 Ethics Commission of the Medical Association Hamburg approved the data collection  
9  
10 4 procedure (No. PV5421).

11  
12 **5 *Consent to participate***  
13

14 6 Participants provided verbal informed consent.  
15

16  
17 **7 *Availability of data and material***  
18

19 8 Data are available by request from the corresponding author.  
20

21  
22 **9 *Competing interests***  
23

24 10 None declared.  
25

26  
27 **11 *Funding***  
28

29 12 This study is part of the joint research project ‘Nutrition, Health and Modern Society: Germany  
30  
31 13 and the USA’ and is funded by the Volkswagen Foundation.  
32

33  
34 **14 *Contributors***

35 15 ACM undertook the statistical analyses and wrote the first draft of the manuscript. OvdK  
36  
37 16 conceived the study design and contributed to the manuscript. TJK and CLS contributed to the  
38  
39 17 questionnaire and critically revised the manuscript.  
40

41  
42 **18 *Patient involvement***

43 19 No patients were involved in this study.  
44  
45  
46  
47  
48  
49  
50  
51  
52  
53  
54  
55  
56  
57  
58  
59  
60

## 1 REFERENCES

1. NCD Risk Factor Collaboration. Trends in adult body-mass index in 200 countries from 1975 to 2014: a pooled analysis of 1698 population-based measurement studies with 19.2 million participants. *The Lancet* 2016;387(10026):1377-96.
2. Mensink GBM, Schienkiewitz A, Haftenberger M, et al. [Overweight and obesity in Germany: Results of the German Health Interview and Examination Survey for Adults (DEGS1)]. *Bundesgesundheitsblatt - Gesundheitsforsch - Gesundheitsschutz* 2013;56(5-6):786-794.
3. Varnaccia G, Zeiher J, Lange C, et al. [Factors influencing childhood obesity – the establishment of a population-wide monitoring system in Germany]. *J Heal Monit* 2017;2(2):85-97.
4. World Health Organization. The Challenge of Obesity in the WHO European Region and the Strategies for Response [Internet]. <http://content.wkhealth.com/linkback/openurl?sid=WKPTLP:landingpage&an=00005768-200803000-00031>. Last accessed January 9, 2018.
5. Weiner B, Perry RP, Magnusson J. An attributional analysis of reactions to stigmas. *J Pers Soc Psychol* 1988;55(5):738-48.
6. Puhl RM, Heuer CA. Obesity stigma: Important considerations for public health. *Am J Public Health* 2010;100(6):1019-1028.
7. Link BG, Phelan JC. Conceptualizing stigma. *Annu Rev Sociol* 2001;27:363-385.
8. World Health Organization. Obesity and overweight [Internet]. <http://www.who.int/mediacentre/factsheets/fs311/en/>. Last accessed January 9, 2018.
9. Puhl R, Brownell KD. Bias, discrimination, and obesity. *Obes Res* 2001;9(12):788-805.
10. Puhl RM, Heuer CA. The stigma of obesity: A review and update. *Obesity* 2009;17(5):941-964.
11. Sikorski C, Luppá M, Glaesmer H, et al. Attitudes of health care professionals towards female obese patients. *Obes Facts* 2013;6(6):512-522.
12. Hilbert A, Rief W, Braehler E. Stigmatizing attitudes toward obesity in a representative population-based sample. *Obesity* 2008;16(7):1529-1534.
13. Mata J, Hertwig R. Public beliefs about obesity relative to other major health risks: representative cross-sectional surveys in the USA, the UK, and Germany. *Ann Behav Med* 2018;52(4):273-286.
14. Sikorski C, Luppá M, Angermeyer MC, et al. The association of BMI and social distance towards obese individuals is mediated by sympathy and understanding. *Soc Sci Med* 2015;128:25-30.
15. Himmelstein MS, Puhl RM, Quinn DM. Intersectionality: an understudied framework for addressing weight stigma. *Am J Prev Med* 2017;53(4):421-431.
16. Puhl RM, Andreyeva T, Brownell KD. Perceptions of weight discrimination: Prevalence and comparison to race and gender discrimination in America. *Int J Obes* 2008;32(6):992-1000.

- 1  
2  
3 1 17. Tang-Péronard JL, Heitmann BL. Stigmatization of obese children and adolescents, the  
4 2 importance of gender. *Obes Rev* 2008;9(6):522-534.
- 5  
6 3 18. Almenara CA, Ježek S. The source and impact of appearance teasing: An examination  
7 4 by sex and weight status among early adolescents from the Czech Republic. *J Sch*  
8 5 *Health* 2015;85(3):163-170.
- 9  
10 6 19. Fikkan JL, Rothblum ED. Is fat a feminist issue? Exploring the gendered nature of  
11 7 weight bias. *Sex Roles* 2012;66:575-592.
- 12  
13 8 20. Hebl MR, Turchin JM. The stigma of obesity: What about men? *Basic Appl Soc Psych*  
14 9 2005;27(3):267-275.
- 15  
16 10 21. Slater LZ, Moneyham L, Vance DE, et al. The multiple stigma experience and quality  
17 11 of life in older gay men with HIV. *J Assoc Nurses AIDS Care* 2015;26(1):24-35.
- 18  
19 12 22. Grollman EA. Multiple disadvantaged statuses and health: the role of multiple forms of  
20 13 discrimination. *J Health Soc Behav* 2014;55(1):3-19.
- 21  
22 14 23. Radcliffe J, Doty N, Hawkins LA, et al. Stigma and sexual health risk in HIV-positive  
23 15 African American young men who have sex with men. *AIDS Patient Care STDS*  
24 16 2010;24(8):493-499.
- 25  
26 17 24. Puhl RM, Luedicke J, Heuer CA. The stigmatizing effect of visual media portrayals of  
27 18 obese persons on public attitudes: does race or gender matter? *J Health Commun*  
28 19 2013;18(7):805-826.
- 29  
30 20 25. Gray L. Social determinants of health, disaster vulnerability, severe and morbid obesity  
31 21 in adults: triple jeopardy? *Int J Environ Res Public Health* 2017;14(12):1452.
- 32  
33 22 26. Mackenbach JP, Stirbu I, Roskam A-JR, et al. Socioeconomic inequalities in health in  
34 23 22 European countries. *N Engl J Med* 2008;358(23):2468-2481.
- 35  
36 24 27. Kuntz B, Lampert T. Socioeconomic factors and obesity. *Dtsch Arzteblatt Int* 2010;  
37 25 107(30):517-522.
- 38  
39 26 28. infas [Institute for Applied Social Sciences]. [About every tenth person without  
40 27 landline in household] [Internet].  
41 28 [https://www.infas.de/fileadmin/user\\_upload/PDF/infas\\_PM\\_Mobile\\_Onlys\\_Kommuni](https://www.infas.de/fileadmin/user_upload/PDF/infas_PM_Mobile_Onlys_Kommuni)  
42 29 [kationsmonitor.pdf](https://www.infas.de/fileadmin/user_upload/PDF/infas_PM_Mobile_Onlys_Kommuni). Last accessed January 9, 2018.
- 43  
44 30 29. Kish L. A procedure for objective respondent selection within the household. *J Am Stat*  
45 31 *Assoc* 1949;44(247):380-387.
- 46  
47 32 30. von dem Knesebeck O, Kofahl C, Makowski AC. Differences in depression stigma  
48 33 towards ethnic and socio-economic groups in Germany – exploring the hypothesis of  
49 34 double stigma. *J Affect Disord* 2016;208:82-86.
- 50  
51 35 31. Makowski AC, Mnich EE, Ludwig J, et al. Changes in beliefs and attitudes toward  
52 36 people with depression and schizophrenia - results of a public campaign in Germany.  
53 37 *Psychiatry Res* 2016;237:271-278.
- 54  
55 38 32. Schlinzig T, Schneiderat G. [Possibilities to increase availability in telephone surveys].  
56 39 In: Weichbold M, Bacher J, Wolf C, eds. [Survey research: challenges and limits].  
57 40 Wiesbaden: VS Verlag für Sozialwissenschaften 2009:21-43.
- 58  
59 41 33. Evans SC, Roberts MC, Keeley JW, et al. Vignette methodologies for studying



- 1  
2  
3 1 clinicians' decision-making: Validity, utility, and application in ICD-11 field studies.  
4 2 Int J Clin Heal Psychol 2015;15(2):160-170.  
5  
6 3 34. Schomerus G, Matschinger H, Angermeyer MC. Continuum beliefs and stigmatizing  
7 4 attitudes towards persons with schizophrenia, depression and alcohol dependence.  
8 5 *Psychiatry Res* 2013;209(3):665-669.  
9  
10 6 35. Sikorski C, Luppá M, Brähler E, et al. Obese children, adults and senior citizens in the  
11 7 eyes of the general public: results of a representative study on stigma and causation of  
12 8 obesity. *PLoS One* 2012;7(10):e46924.doi:10.1371/journal.pone.0046924.  
13  
14 9 36. Bacon JG, Scheltema KE, Robinson BE. Fat phobia scale revisited: The short form. *Int*  
15 10 *J Obes* 2001;25(2):252-257.  
16  
17 11 37. Robinson BBE, Bacon JG, Reilly JO. Fat Phobia: Measuring, understanding, and  
18 12 changing Anti-Fat Attitudes. *Int J Eat Disord* 1993;14(4):467-480.  
19  
20 13 38. Stein J, Luppá M, Ruzanska U, et al. Measuring negative attitudes towards overweight  
21 14 and obesity in the German population-Psychometric properties and reference values for  
22 15 the German short version of the Fat Phobia Scale (FPS). *PLoS One* 2014;9(12):  
23 16 e114641.doi:10.1371/journal.pone.0114641.  
24  
25 17 39. Puhl RM, Luedicke J, Heuer C. Weight-based victimization toward overweight  
26 18 adolescents: Observations and reactions of peers. *J Sch Health* 2011;81(11):696-703.  
27  
28 19 40. Angermeyer MC, Holzinger A, Matschinger H. Emotional reactions to people with  
29 20 mental illness. *Epidemiol Psychiatr Sci* 2010;19(1):26-32.  
30  
31 21 41. Link BG, Cullen FT, Wozniak JF. The social rejection of former mental patients:  
32 22 understanding why labels matter. *Am J Sociol* 1987;92(6):1461-500.  
33  
34 23 42. Bogardus E. Measuring social distance. *J Appl Sociol* 1925;9:299-308.  
35  
36 24 43. IBM. SPSS Statistics for Windows. Armonk, NY: IBM Corp. 2013.  
37  
38 25 44. International Labour Office. International Standard Classification of Occupations:  
39 26 ISCO-08 [Internet]. [http://www.ilo.org/wcmsp5/groups/public/---dgreports/---dcomm/---publ/documents/publication/wcms\\_172572.pdf](http://www.ilo.org/wcmsp5/groups/public/---dgreports/---dcomm/---publ/documents/publication/wcms_172572.pdf). Last accessed January 9, 2018.  
40 27  
41 28 45. Statistisches Jahrbuch 2016 [Internet].  
42 29 [https://www.destatis.de/DE/Publikationen/StatistischesJahrbuch/StatistischesJahrbuch2016.pdf?\\_\\_blob=publicationFile](https://www.destatis.de/DE/Publikationen/StatistischesJahrbuch/StatistischesJahrbuch2016.pdf?__blob=publicationFile). Last accessed August 28, 2018.  
43 30  
44 31 46. Statistisches Bundesamt 2016. [Internet]  
45 32 [https://www.destatis.de/DE/ZahlenFakten/GesellschaftStaat/Bevoelkerung/Bevoelkerungsstand/Tabellen/Zensus\\_Geschlecht\\_Staatsangehoerigkeit.html](https://www.destatis.de/DE/ZahlenFakten/GesellschaftStaat/Bevoelkerung/Bevoelkerungsstand/Tabellen/Zensus_Geschlecht_Staatsangehoerigkeit.html). Last accessed August 28, 2018.  
46 33  
47 34  
48 35 47. Crenshaw K. Demarginalizing the intersection of race and sex: a black feminist critique  
49 36 of antidiscrimination doctrine, feminist theory and antiracist politics. *Univ Chic Leg*  
50 37 *Forum* 1989;139:139-167.  
51 38  
52 39 48. Brennan MA, Lalonde CE, Bain JL. Body image perceptions: do gender differences  
53 40 exist? *Psy Chi J Undergrad Res* 2010;15(3):130-138.  
54  
55  
56  
57  
58  
59  
60

- 1  
2  
3 1 49. Grossbard JR, Neighbors C, Larimer ME. Perceived norms for thinness and  
4 2 muscularity among college students: what do men and women really want? *Eat Behav*  
5 3 2011;12(3):192-199.  
6  
7 4 50. Boswell RG, White MA. Gender differences in weight bias internalisation and eating  
8 5 pathology in overweight individuals. *Adv Eat Disord* 2015;3(3):259-268.  
9  
10 6 51. Briggs SR, Cheek JM. The role of factor analysis in the development and evaluation of  
11 7 personality scales. *J Pers* 1986;54(1):106-148.  
12  
13  
14  
15  
16  
17  
18  
19  
20  
21  
22  
23  
24  
25  
26  
27  
28  
29  
30  
31  
32  
33  
34  
35  
36  
37  
38  
39  
40  
41  
42  
43  
44  
45  
46  
47  
48  
49  
50  
51  
52  
53  
54  
55  
56  
57  
58  
59  
60

For peer review only



## APPENDIX

### Female vignettes

Diana D. is *a lawyer* and 46 years old. With a height of 5'5 and a weight of 200 pounds, she is severely overweight.

Diana D. is *a cleaner* and 46 years old. With a height of 5'5 and a weight of 200 pounds, she is severely overweight.

### Male vignettes

John D. is *a lawyer* and 46 years old. With a height of 5'9 and a weight of 230 pounds, he is severely overweight.

John D. is *a janitor* and 46 years old. With a height of 5'9 and a weight of 230 pounds, he is severely overweight.

STROBE Statement—Checklist of items that should be included in reports of *cross-sectional studies*

|                           | Item No | Recommendation                                                                                                                                                                                    | Page                                     |
|---------------------------|---------|---------------------------------------------------------------------------------------------------------------------------------------------------------------------------------------------------|------------------------------------------|
| <b>Title and abstract</b> | 1       | (a) Indicate the study's design with a commonly used term in the title or the abstract                                                                                                            | 2                                        |
|                           |         | (b) Provide in the abstract an informative and balanced summary of what was done and what was found                                                                                               | 2                                        |
| <b>Introduction</b>       |         |                                                                                                                                                                                                   |                                          |
| Background/rationale      | 2       | Explain the scientific background and rationale for the investigation being reported                                                                                                              | 5                                        |
| Objectives                | 3       | State specific objectives, including any prespecified hypotheses                                                                                                                                  | 5                                        |
| <b>Methods</b>            |         |                                                                                                                                                                                                   |                                          |
| Study design              | 4       | Present key elements of study design early in the paper                                                                                                                                           | 6,7                                      |
| Setting                   | 5       | Describe the setting, locations, and relevant dates, including periods of recruitment, exposure, follow-up, and data collection                                                                   | 6                                        |
| Participants              | 6       | (a) Give the eligibility criteria, and the sources and methods of selection of participants                                                                                                       | 6                                        |
| Variables                 | 7       | Clearly define all outcomes, exposures, predictors, potential confounders, and effect modifiers. Give diagnostic criteria, if applicable                                                          | 7,8                                      |
| Data sources/ measurement | 8*      | For each variable of interest, give sources of data and details of methods of assessment (measurement). Describe comparability of assessment methods if there is more than one group              | 7,8                                      |
| Bias                      | 9       | Describe any efforts to address potential sources of bias                                                                                                                                         | 6,8                                      |
| Study size                | 10      | Explain how the study size was arrived at                                                                                                                                                         | 6                                        |
| Quantitative variables    | 11      | Explain how quantitative variables were handled in the analyses. If applicable, describe which groupings were chosen and why                                                                      | 7,8                                      |
| Statistical methods       | 12      | (a) Describe all statistical methods, including those used to control for confounding                                                                                                             | 8                                        |
|                           |         | (b) Describe any methods used to examine subgroups and interactions                                                                                                                               | 8                                        |
|                           |         | (c) Explain how missing data were addressed                                                                                                                                                       | 8                                        |
|                           |         | (d) If applicable, describe analytical methods taking account of sampling strategy                                                                                                                | -                                        |
|                           |         | (e) Describe any sensitivity analyses                                                                                                                                                             | -                                        |
| <b>Results</b>            |         |                                                                                                                                                                                                   |                                          |
| Participants              | 13*     | (a) Report numbers of individuals at each stage of study—eg numbers potentially eligible, examined for eligibility, confirmed eligible, included in the study, completing follow-up, and analysed | 6,9                                      |
|                           |         | (b) Give reasons for non-participation at each stage                                                                                                                                              | 6                                        |
|                           |         | (c) Consider use of a flow diagram                                                                                                                                                                | -                                        |
| Descriptive data          | 14*     | (a) Give characteristics of study participants (eg demographic, clinical, social) and information on exposures and potential confounders                                                          | Table 1                                  |
|                           |         | (b) Indicate number of participants with missing data for each variable of interest                                                                                                               | Table 2<br>Table 3<br>Table 4<br>Table 5 |

|                          |     |                                                                                                                                                                                                              |                                          |
|--------------------------|-----|--------------------------------------------------------------------------------------------------------------------------------------------------------------------------------------------------------------|------------------------------------------|
| Outcome data             | 15* | Report numbers of outcome events or summary measures                                                                                                                                                         | Table 2<br>Table 3<br>Table 4<br>Table 5 |
| Main results             | 16  | (a) Give unadjusted estimates and, if applicable, confounder-adjusted estimates and their precision (eg, 95% confidence interval). Make clear which confounders were adjusted for and why they were included | Table 2<br>Table 3<br>Table 4<br>Table 5 |
|                          |     | (b) Report category boundaries when continuous variables were categorized                                                                                                                                    | -                                        |
|                          |     | (c) If relevant, consider translating estimates of relative risk into absolute risk for a meaningful time period                                                                                             | -                                        |
| Other analyses           | 17  | Report other analyses done—eg analyses of subgroups and interactions, and sensitivity analyses                                                                                                               | 15,16                                    |
| <b>Discussion</b>        |     |                                                                                                                                                                                                              |                                          |
| Key results              | 18  | Summarise key results with reference to study objectives                                                                                                                                                     | 15,16                                    |
| Limitations              | 19  | Discuss limitations of the study, taking into account sources of potential bias or imprecision. Discuss both direction and magnitude of any potential bias                                                   | 16,17                                    |
| Interpretation           | 20  | Give a cautious overall interpretation of results considering objectives, limitations, multiplicity of analyses, results from similar studies, and other relevant evidence                                   | 16,17                                    |
| Generalisability         | 21  | Discuss the generalisability (external validity) of the study results                                                                                                                                        | 17                                       |
| <b>Other information</b> |     |                                                                                                                                                                                                              |                                          |
| Funding                  | 22  | Give the source of funding and the role of the funders for the present study and, if applicable, for the original study on which the present article is based                                                | 18                                       |

\*Give information separately for exposed and unexposed groups.

**Note:** An Explanation and Elaboration article discusses each checklist item and gives methodological background and published examples of transparent reporting. The STROBE checklist is best used in conjunction with this article (freely available on the Web sites of PLoS Medicine at <http://www.plosmedicine.org/>, Annals of Internal Medicine at <http://www.annals.org/>, and Epidemiology at <http://www.epidem.com/>). Information on the STROBE Initiative is available at [www.strobe-statement.org](http://www.strobe-statement.org).

# BMJ Open

## Social deprivation, gender and obesity: multiple stigma? Results of a population survey from Germany

|                                 |                                                                                                                                                                                                                                                                                                                                                                                                                                                                |
|---------------------------------|----------------------------------------------------------------------------------------------------------------------------------------------------------------------------------------------------------------------------------------------------------------------------------------------------------------------------------------------------------------------------------------------------------------------------------------------------------------|
| Journal:                        | <i>BMJ Open</i>                                                                                                                                                                                                                                                                                                                                                                                                                                                |
| Manuscript ID                   | bmjopen-2018-023389.R3                                                                                                                                                                                                                                                                                                                                                                                                                                         |
| Article Type:                   | Research                                                                                                                                                                                                                                                                                                                                                                                                                                                       |
| Date Submitted by the Author:   | 14-Feb-2019                                                                                                                                                                                                                                                                                                                                                                                                                                                    |
| Complete List of Authors:       | Makowski, Anna; University Medical Center Hamburg-Eppendorf, Department of Medical Sociology<br>Kim, Tae; University Medical Center Hamburg-Eppendorf, Department of Medical Sociology<br>Luck-Sikorski, Claudia; SRH University of Applied Health Sciences; University of Leipzig, Integrated Research and Treatment Center (IFB) Adiposity Diseases<br>von dem Knesebeck, Olaf; University Medical Center Hamburg-Eppendorf, Department of Medical Sociology |
| <b>Primary Subject Heading</b>: | Sociology                                                                                                                                                                                                                                                                                                                                                                                                                                                      |
| Secondary Subject Heading:      | Sociology                                                                                                                                                                                                                                                                                                                                                                                                                                                      |
| Keywords:                       | multiple stigma, obesity, Germany, socioeconomic status, gender                                                                                                                                                                                                                                                                                                                                                                                                |
|                                 |                                                                                                                                                                                                                                                                                                                                                                                                                                                                |

SCHOLARONE™  
Manuscripts

1  
2  
3 **1 Social deprivation, gender and obesity: multiple stigma? Results**  
4  
5  
6 **2 of a population survey from Germany**  
7

8  
9 3 Anna C. Makowski<sup>1</sup>, Tae Jun Kim\*<sup>1</sup>, Claudia Luck-Sikorski<sup>2,3</sup>, Olaf von dem Knesebeck<sup>1</sup>  
10

11  
12  
13 4 <sup>1</sup>*Department of Medical Sociology, University Medical Center Hamburg-Eppendorf,*  
14 5 *Martinistrasse 52, 20146 Hamburg, Germany*

15  
16 6 <sup>2</sup>*Integrated Research and Treatment Center (IFB) Adiposity Diseases, University of Leipzig,*  
17 7 *Philipp-Rosenthal-Str. 27, 04103 Leipzig, Germany*

18  
19 8 <sup>3</sup>*SRH University of Applied Health Sciences, Neue Str. 28-30, 07548 Gera, Germany*  
20  
21 9

22 10 E-mail: t.kim@uke.uni-hamburg.de

23 11 \*Corresponding author  
24  
25  
26  
27  
28  
29  
30  
31  
32  
33  
34  
35  
36  
37  
38  
39  
40  
41  
42  
43  
44  
45  
46  
47  
48  
49  
50  
51  
52  
53  
54  
55  
56  
57  
58  
59  
60

Word count: 3877

# 1 **Social deprivation, gender and obesity: multiple stigma? Results of** 2 **a population survey from Germany**

3 **Objectives:** Individuals with obesity are subject to stigmatization, resulting in discrimination.  
4 Studies focusing on obesity stigma often do not account for social conditions that also may be  
5 associated with stigmatization. Following an intersectional approach, social categories such as  
6 gender and socio-economic status (SES) can interact and form a basis for multiple stigma. The  
7 present study analyses differences in public obesity stigma depending on gender and SES, as  
8 well as possible interdependencies between these social categories.

9 **Design:** Representative cross-sectional telephone survey.

10 **Participants:** 692 randomly selected adults ( $\geq 18$  years) in Germany.

11 **Methods:** Different vignettes were presented, depicting a lawyer (male/female) or a  
12 janitor/cleaner (male/female) with obesity. Following the vignette, different components of  
13 stigma were assessed: (1) fat phobia, (2) emotional reactions to a person with obesity, and (3)  
14 desire for social distance. Associations between gender, SES, and stigma components were  
15 tested in multiple linear regression analyses.

16 **Results:** A low SES in the obesity vignette (janitor/cleaner) was significantly associated with  
17 higher fat phobia scores as well as desire for social distance, compared to the vignette with a  
18 person with obesity and a high SES (lawyer). Being a male with obesity was significantly  
19 associated with more pronounced negative emotional reactions and greater desire for social  
20 distance. There were no significant interaction effects between gender and SES.

21 **Conclusions:** Results support the hypothesis of multiple stigma. Being male or of low SES was  
22 significantly associated with more pronounced negative attitudes in the German public.  
23 Following the concept of intersectionality, our findings indicate that obesity stigma can  
24 exacerbate pre-existing inequalities. This needs to be considered in development and  
25 implementation of prevention and anti-stigma measures.

26 **Keywords:** stigma; multiple stigma; attitudes; obesity; Germany; differences; socioeconomic  
27 status; occupational position; gender

28

29

## 1 **STRENGTHS AND LIMITATIONS OF THIS STUDY**

- 2 • This is the first study analyzing socio-economic status (SES) and gender in the context of  
3 public obesity stigma.
- 4 • Analyses are based on a national telephone survey not only relying on landline but also  
5 including mobile-only users all over Germany.
- 6 • Pre-recorded audio vignettes were used to identify additional stigma effects. To test for a  
7 separation of obesity stigma from the stigma associated with gender and SES, a neutral  
8 control vignette would have been necessary.
- 9 • Although vignettes are a frequently used method in stigma research, they need to be short  
10 and bear the risk of not conveying a holistic picture of an individual with obesity and  
11 different social characteristics.

## 1 INTRODUCTION

2 The proportion of people who are overweight or live with obesity has increased continuously  
3 over the past decades.[1] In Germany, the current Health Interview and Examination Survey  
4 for Adults reports a prevalence rate of obesity (defined as Body Mass Index (BMI)  $\geq 30\text{kg/m}^2$ )  
5 of approximately 24%.[2] The etiology of obesity is multi-faceted, different factors such as  
6 behavioral, biological, psychosocial, context-related or prenatal conditions concur.[3]  
7 However, poor diet and sedentary behavior are often erroneously seen as the primary reason  
8 for overweight.[4] This in turn lays the focus on individual responsibility and fosters public  
9 stereotypes of laziness and weak will. According to attribution theory, believing the condition  
10 to be under a person's control determines greater stigmatizing reactions.[5] The public  
11 misconception of causes of overweight and obesity is common and contributes to the expression  
12 of obesity stigma.[6] Individuals with overweight or obesity display a physical 'mark' that sets  
13 them apart from others. Link and Phelan [7] have provided a process model, in which stigma is  
14 conceptualized as several distinct, but interrelated steps: differences between social groups are  
15 distinguished and *labeled*. These labels are linked to *stereotypes* (undesired characteristics) that  
16 form the basis of a *separation* of 'us' and 'them'. Thusly-labeled individuals experience *status*  
17 *loss* and *discrimination* in a context in which power is exercised.

18 There is a public recognition of obesity as a chronic condition and it is a classified disease in  
19 some countries (but not Germany).[8] Nevertheless, individuals with obesity experience  
20 discrimination in daily life, which in turn reinforces negative stereotypes and stigmatizing  
21 processes.[7] Ascribing negative attributes such as unintelligent, lack of self-discipline or  
22 emotionally instable [9,10] to persons who are obese, activates processes that result in  
23 discrimination in different settings. This could be shown for the education and employment  
24 sector as well as personal relationships.[10] Furthermore, stigmatizing attitudes and  
25 discrimination are present in the health care sector, possibly leading to the avoidance of  
26 necessary treatment.[11] The adverse health consequences of obesity stigma have been shown  
27 on psychological (e.g. depression, self-esteem) and physical (eating behavior, physical activity,  
28 cardiovascular health outcomes) levels.[10]

29 One German study found that about one fourth of the general public displays stigmatizing  
30 attitudes regarding the 'Weight Control/Blame' subscale from the Antifat Attitudes Test.[12]  
31 High levels of responsibility for becoming obese are attributed to the individual, which is  
32 associated with the belief that the individual should be liable for treatment costs to a great  
33 extent.[13] Sikorski et al. examined emotional reactions and social distance towards individuals



1  
2  
3 1 with obesity and found that the most rejected domains were personal ability as well as social  
4 2 interaction.[14]

5  
6  
7 3 In terms of gender differences, studies reported higher weight bias internalization [15] and  
8 4 greater risk for weight/height discrimination [16] among women. In children and adolescents,  
9 5 girls with overweight have been found to be subject to teasing and social  
10 6 marginalization.[17,18] Similar results are presented by Fikkan and Rothblum,[19] who found  
11 7 women with obesity to be more stigmatized in education and employment sectors than men.  
12 8 However, gender differences in obesity stigma have rarely been examined, and results are not  
13 9 consistent.[20]

14  
15  
16 10 In recent years, stigma research has paid increased attention to multiple social identities and  
17 11 their interaction to influence stigmatization. This intersectional approach allows examining how  
18 12 multiple social categories, e.g. being categorized as ‘female’, ‘black’ or both, interact to  
19 13 produce or protect against health risks or discrimination.[15] This may be referred to as  
20 14 ‘multiple stigma’ [21] or ‘double disadvantage’.[22] These concepts suggest that a person can  
21 15 belong to different, possibly stigmatized social groups which exerts cumulative effects.[23]  
22 16 When it comes to obesity stigma at the intersection of gender and race, few studies have been  
23 17 conducted and results were inconsistent. Himmelstein et al. [15] found no divergences in  
24 18 obesity stigma according to race or gender, whereas Puhl et al. found that African American  
25 19 females with obesity evoked higher ratings of dislike and social distance than Caucasian  
26 20 females with obesity.[24] It has been postulated by Gray that severe and extreme obesity  
27 21 compound pre-existing socioeconomic inequalities in context of vulnerability.[25] However, to  
28 22 date no study has focused on the possible additive or multiple effects of gender and socio-  
29 23 economic status (SES) in the context of obesity stigma. This is astonishing, as there are socio-  
30 24 economic inequalities in the prevalence of obesity.[26] This also holds true for Germany, where  
31 25 obesity is more common among children and adults who are of low SES. Women in this group  
32 26 appear to be excessively affected by obesity.[27]

33  
34  
35 27 Against this background, we analyze differences in public stigma towards low vs. high SES  
36 28 persons as well as female vs. male persons with obesity. By incorporating the interaction of  
37 29 gender x SES, we additionally examine possible interdependencies and their associations with  
38 30 obesity stigma.

39  
40  
41 31

## 32 **METHODS**

## 1 **Study design and sample**

2 Analyses are based on a national telephone survey (computer assisted telephone interview  
3 (CATI)), conducted between March and April 2017. The sampling was based on data of the  
4 Association of German Market and Social Research (ADM), which includes registered as well  
5 as non-registered telephone numbers via random digital dialing. Already in 2010, around 13%  
6 of adults (age 16 years and older) in Germany did not have access to landline and solely used a  
7 mobile phone.[28] As this proportion has increased since 2010 and in order to increase the  
8 probability to reach persons who are rarely at home, a share of 30% mobile numbers was  
9 incorporated in the initial sample. To ensure a sample representative of the German population,  
10 all regions in Germany were included.

11 Regarding mobile numbers, target persons were the owner or main user of the mobile phone.  
12 The connection was considered a neutral drop-out if the respondent was younger than 18 years.  
13 In households that were contacted via landline, the Kish-Selection-Grid [29] was applied to  
14 randomly select a person from this household. The interviewer collected the age and gender of  
15 everyone in the household that was eligible for the survey and then randomly selected one  
16 person from that list. At the start of the interview, respondents were informed that the survey's  
17 focus was on nutrition, health, and wellbeing.

18 The overall sample of this study consisted of 1,401 persons. To obtain this number, 2,849  
19 people were randomly selected (net sample). Of these, 862 persons (30.25%) refused to  
20 participate in the interview. Further 586 persons (20.57%) could not be reached. This led to a  
21 total response rate of 49.18%. Previous telephone interview studies have reached similar rates  
22 [30,31] and the response can be regarded satisfactory for telephone surveys in Germany.[32] In  
23 the study, eight different vignettes were used. The present analyses focus on four vignettes  
24 depicting a lawyer (male/female) or a janitor/cleaner (male/female) with obesity, resulting in a  
25 subsample of n=692 under study.

26 The Ethics Commission of the Medical Association in Hamburg approved this study (No.  
27 PV5421). Since the interviews were telephone-based, the respondents were verbally informed  
28 about the study and asked for consent to participate. Participants' consent and refusal were  
29 documented. As we used data from a population survey, patients were not involved in the  
30 development and design of the research question and the study.

## 31 **Instruments**

32 *Vignette manipulation*

1  
2  
3 1 Vignettes have been frequently applied in the social sciences to investigate attitudes or intended  
4 behavior.[33] In stigma research, they have been used to convey realistic pictures of an  
5 2 individual, e.g. with depression, schizophrenia, or obesity.[34,35]  
6 3  
7  
8

9 4 In the present study, all pre-recorded audio vignettes conveyed the same information, while two  
10 5 characteristics were varied: gender (female/male) and occupational position as an indicator of  
11 6 SES (low = janitor or cleaner / high = lawyer). This resulted in four different case stories that  
12 7 described an individual with obesity (please see appendix). One vignette was randomly  
13 8 assigned to each respondent, resulting in about 175 respondents per vignette. Weight and height  
14 9 were stated, yielding a BMI of approximately 32 kg/m<sup>2</sup>. This was further emphasized by the  
15 10 comment that the person 'is severely overweight'. A trained speaker audio-recorded the case  
16 11 stories. To neutralize possible interviewer effects, the files were directly played to the  
17 12 respondents from the computer via telephone line. Preceding the presentation of the vignette,  
18 13 there was a set of questions related to respondents' own experience with overweight. This was  
19 14 self-reported weight and height, if the respondent has ever been overweight, tried to lose weight  
20 15 or has personal contact to persons with obesity.  
21  
22  
23  
24  
25  
26  
27  
28  
29

### 30 16 *Obesity stigma*

31  
32 17 To assess stigmatizing attitudes toward the person described in the vignette, the short form of  
33 18 the *Fat Phobia Scale (FPS)* by Bacon et al. [36] was used. This comprised 14 items of the  
34 19 original 50-item scale.[37] The short version demonstrated excellent reliability and was  
35 20 strongly correlated with the long form. Moreover, the 14-item-scale accounted for the largest  
36 21 amount of variance in factor analysis.[36] On a 5-point semantic differential scale, 14 pairs of  
37 22 adjectives are introduced that capture common beliefs about people who are obese. The FPS  
38 23 short form has been translated and applied in German by Luck-Sikorski and colleagues.[35]  
39 24 Principal component analysis with varimax rotation yielded a 4-factorial solution, with the  
40 25 eigenvalue of the fourth factor barely exceeding 1. Similar to a validation study for the German  
41 26 short version of the FPS, the first factor explained the greatest share of variation (25.58%,  
42 27 second factor 10.80%, third factor 8.19%, fourth factor 7.31%) which is why a one factorial  
43 28 solution is supported.[38] Following Bacon et al. [36], some items were inverted where  
44 29 necessary, so that a higher score indicates greater fat phobia. The sum score was divided by the  
45 30 number of items so that the score ranges from 1 to 5. Values < 2.5 indicate positive attitudes  
46 31 and values ≥ 2.5 represent negative attitudes toward a person with obesity.[39] Cronbach's  $\alpha$   
47 32 for the FPS was 0.77.  
48  
49  
50  
51  
52  
53  
54  
55  
56  
57  
58  
59  
60

1  
2  
3 1 Emotional reactions were assessed by nine items representing different ways of emotionally  
4 2 responding to the person described in the vignette. Six items were derived from a scale used in  
5 3 studies on mental illness stigma,[40] while three items were developed based on common  
6 4 stereotypes of obesity. The items were coded from 1 ‘completely disagree’ to 4 ‘completely  
7 5 agree’. A principal component analysis with varimax rotation yielded two different factors. The  
8 6 first factor, termed *negative emotional reactions*, was comprised of the six items ‘I react  
9 7 angrily’, ‘I feel annoyed’, ‘This triggers incomprehension with me’, ‘I feel repelled’, ‘I feel  
10 8 disgust’, and ‘I think this is unaesthetic’. The items “I feel pity”, “I feel sympathy”, and “I want  
11 9 to help” loaded on the second factor of *positive emotional reactions*. Together, the two factors  
12 10 accounted for 50.9 % of variance. Two sum scores were computed, Cronbach’s  $\alpha$  was 0.78 for  
13 11 negative (6 items), and 0.47 for positive emotional reactions (3 items).

12 12 Desire for social distance was assessed by a scale developed by Link et al.,[41] a modified  
13 13 version of the Bogardus *Social Distance Scale*. [42] The instrument contains seven items that  
14 14 represent different social relationships (e.g. neighbor, colleague, or child-carer). On a 4-point  
15 15 Likert-scale, respondents were asked to indicate to what extent they would accept the person  
16 16 described in the vignette. A principal component analysis with varimax rotation was carried  
17 17 out; yielding a single factor that explained 55.1 % of variance. Cronbach’s  $\alpha$  was 0.86. Again,  
18 18 a sum score was computed, with higher scores indicating greater desire for social distance. The  
19 19 distribution of the stigma sum scales across the sample is shown in Table 1.

## 20 **Statistical analyses**

21 21 The analyses were performed using SPSS 22.[43] To test for significant mean differences  
22 22 between groups regarding single items and scales, Mann-Whitney-U tests were applied. This  
23 23 non-parametric test was conducted, since Kolmogorow-Smirnow-Tests revealed that responses  
24 24 to the stigma items did not follow a normal distribution. Determinants of stigmatizing attitudes  
25 25 were introduced into multiple linear regression models. We analyzed two main effects  
26 26 presented in the vignette: SES (janitor or cleaner/lawyer) and gender (female/male). To take  
27 27 into account possible interdependencies, the interaction effect of SES x gender was also  
28 28 introduced into the models. All models were controlled for respondents’ characteristics. Age  
29 29 and BMI were entered as continuous variables. The respondents’ occupational position was  
30 30 expressed in skill levels according to the International Standard Classification of Occupation  
31 31 (ISCO-08).[44] Other variables were the respondents’ gender and personal contact to  
32 32 individuals who are obese.

1 In all analyses, the response options ‘prefer not to say’ and ‘don’t know’ were treated as missing  
 2 values. Exact p values are reported. In view of the number of tests, values of  $p < 0.01$  were  
 3 regarded as statistically significant.

#### 4 *Patient involvement*

5 No patients were involved in this study.

## 6 RESULTS

7 Sociodemographic characteristics of the analyzed sample are briefly presented in table 1. The  
 8 male:female ratio is relatively even, which is similar to the general adult population in Germany  
 9 according to the official statistics [45]. In terms of age, people aged 25 to 39 are  
 10 underrepresented and people aged 60 to 64 are overrepresented in the sample compared to the  
 11 distribution in the official statistics [46]. Almost half of the respondents work in occupational  
 12 positions that are regarded skill level 2 when referring to ISCO.[44] Regarding weight status,  
 13 more than 50% of the respondents reported overweight or obesity. The share of those with  
 14 overweight/obesity corresponds to numbers obtained by other representative studies in  
 15 Germany.[2] The vast majority (84.4%) has or had personal contact to someone who is  
 16 overweight.

17 **Table 1** Sample characteristics (n=627-692)

|                                                                            |                            |
|----------------------------------------------------------------------------|----------------------------|
| <b>Gender</b> (female)                                                     | 48.9%                      |
| <b>Mean age</b> (standard deviation)                                       | 50.9 (18.0)                |
| <b>Age groups</b>                                                          |                            |
| 18 - ≤ 24 years                                                            | 8.1%                       |
| 25 - ≤ 39 years                                                            | 20.0%                      |
| 40 - ≤ 59 years                                                            | 35.1%                      |
| 60 - ≤ 64 years                                                            | 12.6%                      |
| ≥ 65 years                                                                 | 24.2%                      |
| <b>Occupational position</b> (ISCO-08)                                     |                            |
| Skill level 1: <i>Simple/routine physical or manual tasks</i>              | 7.0%                       |
| Skill level 2: <i>Operating machinery and electronic equipment</i>         | 45.5%                      |
| Skill level 3: <i>Complex technical and practical tasks</i>                | 27.1%                      |
| Skill level 4: <i>Complex problem-solving, decision-making, creativity</i> | 20.3%                      |
| <b>Weight status according to BMI</b>                                      |                            |
| <i>Underweight</i> (≤ 18.49)                                               | 2.1%                       |
| <i>Normal weight</i> (18.50 – 24.99)                                       | 42.5%                      |
| <i>Overweight</i> (25.00 – 29.99)                                          | 34.2%                      |
| <i>Obese</i> (≥ 30.00)                                                     | 21.2%                      |
| <b>Contact to someone who is overweight</b> (yes)                          | 84.4%                      |
| <b>Obesity stigma scales, mean (sd), median [interquartile range]</b>      |                            |
| Fat phobia scale <sup>1</sup>                                              | 3.34 (0.49), 3.29 [3-3.64] |

|                                                 |                         |
|-------------------------------------------------|-------------------------|
| Negative emotional reactions scale <sup>2</sup> | 10.29 (3.17), 10 [8-12] |
| Positive emotional reactions scale <sup>3</sup> | 6.91 (1.86), 7 [6-8]    |
| Desire for social distance scale <sup>4</sup>   | 12.72 (1.86), 13 [9-15] |

<sup>1</sup>Fat phobia scale comprised of 14 items, ranging from 1 to 5, values > 2.50 indicate fat phobia; <sup>2</sup> Negative emotional reaction scale comprised of six items; sum scale ranging from 6 to 24; <sup>3</sup>Positive emotional reaction scale comprised of three items; sum scale ranging from 3 to 12; <sup>4</sup>Desire for social distance scale comprised of 7 items, sum scale ranging from 7 to 28.

In tables 2-4, differences in the mean stigma values depending on SES and gender presented in the vignette are reported. Regarding the fat phobia items, the adjective low self-esteem was ascribed to the female vignette significantly more often (respective means were 3.10 for the female vignette and 2.83 for the male vignette, table 2). In contrast, lazy, slow, and self-indulgent were significantly more often attributed to the male vignette. Comparing low and high SES, a homogenous picture emerged. A low SES was significantly associated with greater negative attitudes, expressing individual responsibility (no willpower, poor self-control, weak) as well as insecurity and low self-esteem when compared to high SES.

**Table 2** Fat phobia (FPS, single items and scale); differences according to gender and socio-economic status (SES) in the vignette (mean values (standard deviation))

| Pair of adjectives                                           | Gender                |                     |        | SES                                   |                               | p*     |
|--------------------------------------------------------------|-----------------------|---------------------|--------|---------------------------------------|-------------------------------|--------|
|                                                              | Female<br>(n=337-348) | Male<br>(n=306-316) | p*     | Low<br>Janitor/cleaner<br>(n=317-327) | High<br>Lawyer<br>(n=326-337) |        |
| <i>Industrious ... lazy</i> <sup>1</sup>                     | 2.55 (0.92)           | 2.83 (0.81)         | <0.001 | 2.68 (0.87)                           | 2.69 (0.89)                   | 0.667  |
| <i>Has willpower ... no willpower</i> <sup>1</sup>           | 3.28 (0.97)           | 3.21 (1.04)         | 0.602  | 3.48 (0.98)                           | 3.03 (0.97)                   | <0.001 |
| <i>Attractive ... unattractive</i> <sup>1</sup>              | 3.33 (1.00)           | 3.42 (0.94)         | 0.160  | 3.43 (1.05)                           | 3.32 (0.90)                   | 0.149  |
| <i>Good self-control ... poor self-control</i> <sup>1</sup>  | 3.10 (1.03)           | 3.17 (0.98)         | 0.440  | 3.30 (0.99)                           | 2.97 (1.00)                   | <0.001 |
| <i>Fast ... slow</i> <sup>1</sup>                            | 3.25 (1.01)           | 3.47 (0.99)         | 0.002  | 3.32 (1.06)                           | 3.39 (0.96)                   | 0.592  |
| <i>Having endurance ... having no endurance</i> <sup>1</sup> | 3.41 (1.13)           | 3.37 (1.04)         | 0.297  | 3.39 (1.10)                           | 3.40 (1.07)                   | 0.688  |
| <i>Active ... inactive</i> <sup>1</sup>                      | 3.36 (0.98)           | 3.38 (1.06)         | 0.328  | 3.38 (1.06)                           | 3.35 (0.97)                   | 0.650  |
| <i>Strong ... weak</i> <sup>1</sup>                          | 3.15 (0.99)           | 3.18 (1.02)         | 0.914  | 3.33 (1.03)                           | 3.01 (0.94)                   | <0.001 |
| <i>Self-sacrificing ... self-indulgent</i> <sup>1</sup>      | 3.19 (0.91)           | 3.41 (0.86)         | <0.001 | 3.32 (0.90)                           | 3.28 (0.89)                   | 0.375  |
| <i>Dislikes food ... likes food</i>                          | 4.05 (0.88)           | 4.15 (0.90)         | 0.093  | 4.08 (0.90)                           | 4.12 (0.88)                   | 0.584  |
| <i>Shapely ... shapeless</i> <sup>1</sup>                    | 3.41 (1.15)           | 3.21 (1.17)         | 0.098  | 3.40 (1.16)                           | 3.31 (1.17)                   | 0.753  |
| <i>Undereats ... overeats</i> <sup>1</sup>                   | 3.87 (0.91)           | 3.95 (0.90)         | 0.306  | 3.91 (0.93)                           | 3.90 (0.89)                   | 0.883  |
| <i>Secure ... insecure</i> <sup>1</sup>                      | 3.01 (1.06)           | 2.81 (1.03)         | 0.027  | 3.24 (1.02)                           | 2.61 (0.98)                   | <0.001 |
| <i>High self-esteem ... low self-esteem</i> <sup>1</sup>     | 3.10 (1.05)           | 2.83 (1.05)         | <0.001 | 3.28 (1.00)                           | 2.67 (1.02)                   | <0.001 |
| <b>FPS</b> <sup>1</sup>                                      | 3.31 (0.48)           | 3.32 (0.50)         | 0.995  | 3.40 (0.51)                           | 3.22 (0.46)                   | <0.001 |

<sup>1</sup>Semantic differential scales and mean FPS ranging from 1 to 5, values > 2.50 indicate fat phobia; \*Mann-Whitney-U test

Regarding emotional reactions (table 3), the comparison of gender in the vignette showed that males with obesity evoked significantly more negative emotional reactions on four out of six



1 items as well as on the subscale for negative emotions (respective means were 9.67 for the female vignette and 10.54 for the male vignette). In terms of SES, a cleaner/janitor with obesity evoked significantly more feelings of anger but also more positive emotional reactions, compared to a lawyer with obesity.

**Table 3** Emotional reactions (single items and scales); differences according to gender and socio-economic status (SES) in the vignette (mean values (standard deviation))

|                                                 | Gender                |                     | p*               | SES                                   |                               | p*           |
|-------------------------------------------------|-----------------------|---------------------|------------------|---------------------------------------|-------------------------------|--------------|
|                                                 | Female<br>(n=327-350) | Male<br>(n=293-315) |                  | Low<br>Janitor/cleaner<br>(n=299-326) | High<br>Lawyer<br>(n=321-338) |              |
| <i>Annoyed</i> <sup>1</sup>                     | 1.56 (0.72)           | 1.59 (0.70)         | 0.290            | 1.65 (0.79)                           | 1.50 (0.62)                   | 0.056        |
| <i>Angry</i> <sup>1</sup>                       | 1.36 (0.64)           | 1.55 (0.71)         | <b>&lt;0.001</b> | 1.52 (0.71)                           | 1.38 (0.64)                   | <b>0.005</b> |
| <i>Incomprehension</i> <sup>1</sup>             | 1.88 (0.89)           | 2.04 (0.83)         | <b>0.006</b>     | 2.05 (0.87)                           | 1.87 (0.85)                   | 0.012        |
| <i>Revolted</i> <sup>1</sup>                    | 1.46 (0.69)           | 1.67 (0.75)         | <b>&lt;0.001</b> | 1.62 (0.78)                           | 1.50 (0.67)                   | 0.114        |
| <i>Disgust</i> <sup>1</sup>                     | 1.41 (0.66)           | 1.53 (0.66)         | <b>0.002</b>     | 1.51 (0.69)                           | 1.42 (0.94)                   | 0.078        |
| <i>Unaesthetic</i> <sup>1</sup>                 | 2.01 (0.94)           | 2.15 (0.87)         | 0.022            | 2.08 (0.87)                           | 2.07 (0.95)                   | 0.919        |
| Negative emotional reactions scale <sup>2</sup> | 9.67 (3.06)           | 10.54 (3.24)        | <b>0.001</b>     | 10.43 (3.23)                          | 9.74 (3.05)                   | 0.012        |
| <i>Sympathy</i> <sup>1</sup>                    | 2.58 (0.81)           | 2.53 (0.78)         | 0.769            | 2.54 (0.82)                           | 2.57 (0.77)                   | 0.884        |
| <i>Pity</i> <sup>1</sup>                        | 2.24 (0.94)           | 2.09 (0.90)         | 0.020            | 2.23 (0.92)                           | 2.11 (0.92)                   | 0.034        |
| <i>Want to help</i> <sup>1</sup>                | 2.20 (0.93)           | 2.26 (0.86)         | 0.414            | 2.34 (0.93)                           | 2.12 (0.85)                   | 0.011        |
| Positive emotional reactions scale <sup>3</sup> | 6.97 (1.96)           | 6.86 (1.74)         | 0.692            | 7.08 (2.01)                           | 6.97 (1.96)                   | <b>0.004</b> |

<sup>1</sup>Single items ranging from 1 to 4; <sup>2</sup>Negative emotional reaction scales comprised of six items; sum scale ranging from 6 to 24; <sup>3</sup>Positive emotional reaction scale comprised of three items; sum scale ranging from 3 to 12; \*Mann-Whitney-U test

A consistent picture emerged when comparing desire for social distance according to the person's gender in the vignette (table 4). Males with obesity were met with significantly greater levels of rejection in most aspects of social distance. Gender difference was also significant for the desire for social distance scale (13.15 for males and 11.66 for females). Similarly, a person with obesity and a low SES evoked greater desire for social distance concerning four of seven items. Also, the desire for social distance scale significantly differed between the SES vignettes (13.03 for low SES and 11.72 for high SES).

**Table 4** Desire for social distance (single items and scale); differences according to gender and socio-economic status (SES) in the vignette (mean values (standard deviation))

|                                       | Gender                |                     | p*             | SES                                   |                             | p*             |
|---------------------------------------|-----------------------|---------------------|----------------|---------------------------------------|-----------------------------|----------------|
|                                       | Female<br>(n=332-350) | Male<br>(n=292-312) |                | Low<br>Janitor/cleaner<br>(n=307-324) | High<br>Lawyer<br>(317-338) |                |
| <i>Tenant</i> <sup>1</sup>            | 1.71 (0.92)           | 1.96 (0.86)         | < <b>0.001</b> | 1.98 (0.98)                           | 1.68 (0.78)                 | <b>0.001</b>   |
| <i>Colleague</i> <sup>1</sup>         | 1.39 (0.57)           | 1.48 (0.61)         | 0.012          | 1.43 (0.54)                           | 1.42 (0.63)                 | 0.546          |
| <i>Neighbor</i> <sup>1</sup>          | 1.52 (0.74)           | 1.56 (0.69)         | 0.155          | 1.54 (0.71)                           | 1.54 (0.72)                 | 0.649          |
| <i>Childcare</i> <sup>1</sup>         | 1.70 (0.75)           | 1.95 (0.91)         | < <b>0.001</b> | 1.98 (0.90)                           | 1.66 (0.74)                 | < <b>0.001</b> |
| <i>In-law</i> <sup>1</sup>            | 1.79 (0.90)           | 1.90 (0.79)         | <b>0.003</b>   | 1.98 (0.89)                           | 1.71 (0.78)                 | < <b>0.001</b> |
| <i>Introduce friend</i> <sup>1</sup>  | 1.74 (0.82)           | 2.25 (0.95)         | < <b>0.001</b> | 2.08 (0.92)                           | 1.88 (0.90)                 | <b>0.008</b>   |
| <i>Recommend for job</i> <sup>1</sup> | 1.83 (0.84)           | 2.04 (0.81)         | < <b>0.001</b> | 2.03 (0.83)                           | 1.83 (0.82)                 | 0.011          |
| Desire for social distance scale      | 11.66 (4.12)          | 13.15 (4.00)        | < <b>0.001</b> | 13.03 (4.14)                          | 11.72 (4.03)                | < <b>0.001</b> |

<sup>1</sup>Single items ranging from 1 to 4; <sup>2</sup>Desire for social distance scale comprised of 7 items, sum scale ranging from 7 to 28;

\*Mann-Whitney-U test

The results of multiple linear regression analyses are reported in table 5. While controlling for respondents' characteristics, a significant main effect of SES emerged regarding fat phobia ( $\beta = 0.173$ ). Being a janitor or cleaner with obesity was associated with significantly increased fat phobia compared to lawyers. Regarding positive emotional reactions, there were no significant associations with either gender or SES. However, male persons with obesity were confronted with more negative emotional reactions than females ( $\beta = -0.151$ ). In terms of desire for social distance, both main effects were statistically significant. Being either a male or a janitor/cleaner with obesity was significantly associated with greater desire for social distance. In none of the models did the interaction effect of gender x SES attain statistical significance (table 5).



**Table 5** Linear regression analyses: associations between stigma components and socio-economic status (SES) and gender presented in the vignette

|                                                           | Fat Phobia Scale<br>(n=561) |              |                           | Positive emotional reactions<br>(n=607) |         |                   | Negative emotional reactions<br>(n=614) |               |                             | Social Distance<br>(n=608) |               |                             |
|-----------------------------------------------------------|-----------------------------|--------------|---------------------------|-----------------------------------------|---------|-------------------|-----------------------------------------|---------------|-----------------------------|----------------------------|---------------|-----------------------------|
|                                                           | B                           | $\beta$      | 95% CI                    | B                                       | $\beta$ | 95% CI            | B                                       | $\beta$       | 95% CI                      | B                          | $\beta$       | 95% CI                      |
| <b>Low SES vignette</b><br>(ref. lawyer)                  | <b>0.171</b>                | <b>0.173</b> | <b>0.052 -<br/>0.287*</b> | 0.035                                   | 0.010   | -0.393 -<br>0.464 | 0.304                                   | 0.047         | -0.405 -<br>1.014           | <b>1.122</b>               | <b>0.135</b>  | <b>0.217 -<br/>2.026*</b>   |
| <b>Female gender in</b><br><b>vignette</b><br>(ref. male) | -0.002                      | -0.002       | -0.115 -<br>0.112         | -0.146                                  | -0.039  | -0.556 -<br>0.264 | <b>-0.977</b>                           | <b>-0.151</b> | <b>-1.655 -<br/>-0.299*</b> | <b>-1.201</b>              | <b>-0.145</b> | <b>-2.068 -<br/>-0.334*</b> |
| <b>Interaction gender *</b><br><b>SES in vignette</b>     | -0.021                      | -0.019       | -0.182 -<br>0.139         | 0.539                                   | 0.126   | -0.048 -<br>1.125 | 0.238                                   | 0.032         | -0.730 -<br>1.205           | -0.215                     | -0.023        | -1.451 -<br>1.021           |

\*p<0.01; \*\*p<0.001; the model is adjusted for respondents' gender, age, BMI, occupational position as well as contact to an individual with obesity

## 1 DISCUSSION

2 The concept of multiple stigma suggests that a person can belong to different potentially  
3 stigmatized groups, experiencing an aggregation of disadvantages and discrimination.[23]  
4 Applying this approach to the present study, this would mean that because of their group  
5 affiliation (e.g. being female and of low SES) individuals suffer multiple stigma when  
6 confronted with the burden of obesity. Similarly, the framework of intersectionality describes  
7 the interdependent relationship between different social identities and structural inequities.[47]  
8 Multiple social categories interact and produce or protect against discrimination. In light of this,  
9 obesity stigma can reinforce pre-existing inequalities because of SES and / or gender.

10 The present study is the first to analyze the possible multiple stigma of gender, SES, and  
11 obesity. Following an intersectional approach, it was analyzed whether main effects or the  
12 interaction of social categories possibly reinforce obesity stigma, implying a double or multiple  
13 disadvantage for certain individuals. While there were no statistically significant interaction  
14 effects of categories, we found distinct differences in obesity stigma dependent on gender with  
15 regard different stigma components. Males with obesity were met with more negative emotional  
16 reactions and social distance. This contradicts some previous studies that found (young) women  
17 with overweight or obesity to be met with greater stigmatization than men.[15–19] The  
18 predominance of overly thin women in the media and the promotion of a slim beauty ideal for  
19 females can have different effects on the stigmatization of women and men with obesity.[20]  
20 Nevertheless, over the past decade, a trim and muscular male body image has come to the fore  
21 in most Western societies, shaping a new perspective on body image dissatisfaction and obesity  
22 stigma also among men.[48,49] Men have been found to be similarly stigmatized as women for  
23 being heavy,[20] and the concern about body image is associated with increased eating  
24 pathology in both men and women [50]

25 Regarding SES and obesity, the study revealed significant differences in public attitudes in  
26 several stigma components under study. Those of low SES were rated less favorably with regard  
27 to fat phobia and desire for social distance when compared to persons with high SES. On the  
28 other hand, individuals with low SES were also met with significantly greater prosocial  
29 feelings. It is possible that, next to obesity, the status of a cleaner/janitor is linked to  
30 characteristics (e.g. economic hardship) that evoke pity among respondents. After the  
31 adjustment of respondents' characteristics in the multivariate analyses (gender, age, BMI,  
32 occupational position as well as contact to an individual with obesity), however, only the  
33 associations with fat phobia and social distance were found to be significant.

1  
2  
3 1 Following the concept of intersectionality, and against the background of a disproportionate  
4 2 distribution of obesity (higher prevalence among females of low SES), one could have expected  
5 3 significant interaction effects in multivariate analyses. We were not able to verify this  
6 4 assumption. However, significant main effects of gender and SES indicate a double stigma to  
7 5 the disadvantage of males as well as individuals with a low SES who suffer from obesity.

8  
9  
10 6 Some limitations need to be mentioned and discussed when evaluating our findings. More than  
11 7 half of the individuals eligible for the study were not available or refused to participate.  
12 8 Although participation rates around 50% can be regarded satisfactory for telephone  
13 9 surveys,[32] we cannot rule out selection bias due to non-response. With respect to internal  
14 10 consistency, Cronbach's  $\alpha$  for most scales was good or acceptable. Only the subscale of positive  
15 11 emotional reactions exhibited limited reliability, which could be due to the relatively small  
16 12 number of items. In this case, it is recommended to use the mean inter-item correlation as an  
17 13 indicator for acceptability, which was 0.22 in the present sample. A satisfactory range is said  
18 14 to be 0.2 to 0.4.[51] Furthermore, no conclusions on causal relationships can be drawn as our  
19 15 data are based on a cross-sectional design. Similar to other studies in stigma research, we used  
20 16 vignettes to explore possible multiple stigma of obesity. On the one hand, these should not be  
21 17 too long. On the other hand, only varying one sentence to express different social conditions  
22 18 might have been too short to convey a holistic picture of the individual, or to be kept in mind  
23 19 throughout the whole interview. Also, vignettes had to be understandable for the general  
24 20 population. Therefore, we decided not to report the BMI and not to use the term 'obese'. In this  
25 21 regard, it can be considered a limitation that the vignettes lack medical accuracy. Moreover,  
26 22 due to time constraints, every respondent only received one vignette. The lack of a neutral  
27 23 control condition impedes the interpretation of results. For example, it remains unclear whether  
28 24 respondents associate adjectives such as low self-esteem or insecurity with the fact that the  
29 25 individual in the vignette presented with obesity or pursues the profession of a janitor when  
30 26 compared to a lawyer. This is a limitation that has to be considered when interpreting our  
31 27 findings as an indication of multiple or double stigma. Finally, sample size may have been too  
32 28 small to detect significant interaction effects.

33 29 Differences in stigma based on gender and SES indicate that obesity can exacerbate pre-existing  
34 30 inequalities. The presence of obesity stigma could be shown in many domains of daily life, e.g.  
35 31 education, work, personal, and health care.[10,11] Stigmatization is a risk factor for physical  
36 32 and psychological health problems such as depression, body dissatisfaction, and low self-  
37 33 esteem. Instead of motivating individuals to lose weight, stigma is associated with additional

1 weight gain [6] and underutilization of health care.[11] This implies a vicious circle of mutually  
2 reinforcing negative conditions. The manifold effects of obesity stigma require actions in all  
3 kinds of professional disciplines, e.g. among physicians, dieticians, and scientists in various  
4 fields. To counteract stigma, the topic should be the subject of discussion in obesity intervention  
5 measures, and anti-stigma messages have to be incorporated into obesity prevention campaigns.  
6 Our results underline the need to consider the social dimension of obesity stigma. In  
7 acknowledging the interrelation of social conditions and existing structures, future research  
8 should derive tailored measures to encounter obesity stigma and its related adverse physical  
9 and psychological health outcomes.

1  
2  
3 **1 DECLARATIONS**  
4

5 **2 *Ethical approval***  
6

7  
8 3 Ethics Commission of the Medical Association Hamburg approved the data collection  
9  
10 4 procedure (No. PV5421).

11  
12 **5 *Consent to participate***  
13

14 6 Participants provided verbal informed consent.  
15

16  
17 **7 *Availability of data and material***  
18

19 8 Data are available by request from the corresponding author.  
20

21  
22 **9 *Competing interests***  
23

24 10 None declared.  
25

26  
27 **11 *Funding***  
28

29 12 This study is part of the joint research project ‘Nutrition, Health and Modern Society: Germany  
30  
31 13 and the USA’ and is funded by the Volkswagen Foundation.

32  
33 **14 *Contributors***  
34

35 15 ACM undertook the statistical analyses and wrote the first draft of the manuscript. OvdK  
36  
37 16 conceived the study design and contributed to the manuscript. TJK and CLS contributed to the  
38  
39 17 questionnaire and critically revised the manuscript.  
40  
41  
42  
43  
44  
45  
46  
47  
48  
49  
50  
51  
52  
53  
54  
55  
56  
57  
58  
59  
60

## 1 REFERENCES

1. NCD Risk Factor Collaboration. Trends in adult body-mass index in 200 countries from 1975 to 2014: a pooled analysis of 1698 population-based measurement studies with 19.2 million participants. *The Lancet* 2016;387(10026):1377-96.
2. Mensink GBM, Schienkiewitz A, Haftenberger M, et al. [Overweight and obesity in Germany: Results of the German Health Interview and Examination Survey for Adults (DEGS1)]. *Bundesgesundheitsblatt - Gesundheitsforsch - Gesundheitsschutz* 2013;56(5-6):786-794.
3. Varnaccia G, Zeiher J, Lange C, et al. [Factors influencing childhood obesity – the establishment of a population-wide monitoring system in Germany]. *J Heal Monit* 2017;2(2):85-97.
4. World Health Organization. The Challenge of Obesity in the WHO European Region and the Strategies for Response [Internet]. <http://content.wkhealth.com/linkback/openurl?sid=WKPTLP:landingpage&an=00005768-200803000-00031>. Last accessed January 9, 2018.
5. Weiner B, Perry RP, Magnusson J. An attributional analysis of reactions to stigmas. *J Pers Soc Psychol* 1988;55(5):738-48.
6. Puhl RM, Heuer CA. Obesity stigma: Important considerations for public health. *Am J Public Health* 2010;100(6):1019-1028.
7. Link BG, Phelan JC. Conceptualizing stigma. *Annu Rev Sociol* 2001;27:363-385.
8. World Health Organization. Obesity and overweight [Internet]. <http://www.who.int/mediacentre/factsheets/fs311/en/>. Last accessed January 9, 2018.
9. Puhl R, Brownell KD. Bias, discrimination, and obesity. *Obes Res* 2001;9(12):788-805.
10. Puhl RM, Heuer CA. The stigma of obesity: A review and update. *Obesity* 2009;17(5):941-964.
11. Sikorski C, Luppá M, Glaesmer H, et al. Attitudes of health care professionals towards female obese patients. *Obes Facts* 2013;6(6):512-522.
12. Hilbert A, Rief W, Braehler E. Stigmatizing attitudes toward obesity in a representative population-based sample. *Obesity* 2008;16(7):1529-1534.
13. Mata J, Hertwig R. Public beliefs about obesity relative to other major health risks: representative cross-sectional surveys in the USA, the UK, and Germany. *Ann Behav Med* 2018;52(4):273-286.
14. Sikorski C, Luppá M, Angermeyer MC, et al. The association of BMI and social distance towards obese individuals is mediated by sympathy and understanding. *Soc Sci Med* 2015;128:25-30.
15. Himmelstein MS, Puhl RM, Quinn DM. Intersectionality: an understudied framework for addressing weight stigma. *Am J Prev Med* 2017;53(4):421-431.
16. Puhl RM, Andreyeva T, Brownell KD. Perceptions of weight discrimination: Prevalence and comparison to race and gender discrimination in America. *Int J Obes* 2008;32(6):992-1000.

- 1  
2  
3 1 17. Tang-Péronard JL, Heitmann BL. Stigmatization of obese children and adolescents, the  
4 2 importance of gender. *Obes Rev* 2008;9(6):522-534.  
5  
6 3 18. Almenara CA, Ježek S. The source and impact of appearance teasing: An examination  
7 4 by sex and weight status among early adolescents from the Czech Republic. *J Sch*  
8 5 *Health* 2015;85(3):163-170.  
9  
10 6 19. Fikkan JL, Rothblum ED. Is fat a feminist issue? Exploring the gendered nature of  
11 7 weight bias. *Sex Roles* 2012;66:575-592.  
12  
13 8 20. Hebl MR, Turchin JM. The stigma of obesity: What about men? *Basic Appl Soc Psych*  
14 9 2005;27(3):267-275.  
15  
16 10 21. Slater LZ, Moneyham L, Vance DE, et al. The multiple stigma experience and quality  
17 11 of life in older gay men with HIV. *J Assoc Nurses AIDS Care* 2015;26(1):24-35.  
18  
19 12 22. Grollman EA. Multiple disadvantaged statuses and health: the role of multiple forms of  
20 13 discrimination. *J Health Soc Behav* 2014;55(1):3-19.  
21  
22 14 23. Radcliffe J, Doty N, Hawkins LA, et al. Stigma and sexual health risk in HIV-positive  
23 15 African American young men who have sex with men. *AIDS Patient Care STDS*  
24 16 2010;24(8):493-499.  
25  
26 17 24. Puhl RM, Luedicke J, Heuer CA. The stigmatizing effect of visual media portrayals of  
27 18 obese persons on public attitudes: does race or gender matter? *J Health Commun*  
28 19 2013;18(7):805-826.  
29  
30 20 25. Gray L. Social determinants of health, disaster vulnerability, severe and morbid obesity  
31 21 in adults: triple jeopardy? *Int J Environ Res Public Health* 2017;14(12):1452.  
32  
33 22 26. Mackenbach JP, Stirbu I, Roskam A-JR, et al. Socioeconomic inequalities in health in  
34 23 22 European countries. *N Engl J Med* 2008;358(23):2468-2481.  
35  
36 24 27. Kuntz B, Lampert T. Socioeconomic factors and obesity. *Dtsch Arzteblatt Int* 2010;  
37 25 107(30):517-522.  
38  
39 26 28. infas [Institute for Applied Social Sciences]. [About every tenth person without  
40 27 landline in household] [Internet].  
41 28 [https://www.infas.de/fileadmin/user\\_upload/PDF/infas\\_PM\\_Mobile\\_Only\\_Kommuni](https://www.infas.de/fileadmin/user_upload/PDF/infas_PM_Mobile_Only_Kommunikationsmonitor.pdf)  
42 29 [kationsmonitor.pdf](https://www.infas.de/fileadmin/user_upload/PDF/infas_PM_Mobile_Only_Kommunikationsmonitor.pdf). Last accessed January 9, 2018.  
43  
44 30 29. Kish L. A procedure for objective respondent selection within the household. *J Am Stat*  
45 31 *Assoc* 1949;44(247):380-387.  
46  
47 32 30. von dem Knesebeck O, Kofahl C, Makowski AC. Differences in depression stigma  
48 33 towards ethnic and socio-economic groups in Germany – exploring the hypothesis of  
49 34 double stigma. *J Affect Disord* 2016;208:82-86.  
50  
51 35 31. Makowski AC, Mnich EE, Ludwig J, et al. Changes in beliefs and attitudes toward  
52 36 people with depression and schizophrenia - results of a public campaign in Germany.  
53 37 *Psychiatry Res* 2016;237:271-278.  
54  
55 38 32. Schlinzig T, Schneiderat G. [Possibilities to increase availability in telephone surveys].  
56 39 In: Weichbold M, Bacher J, Wolf C, eds. [Survey research: challenges and limits].  
57 40 Wiesbaden: VS Verlag für Sozialwissenschaften 2009:21-43.  
58  
59 41 33. Evans SC, Roberts MC, Keeley JW, et al. Vignette methodologies for studying



- 1  
2  
3 1 clinicians' decision-making: Validity, utility, and application in ICD-11 field studies.  
4 2 Int J Clin Heal Psychol 2015;15(2):160-170.  
5  
6 3 34. Schomerus G, Matschinger H, Angermeyer MC. Continuum beliefs and stigmatizing  
7 4 attitudes towards persons with schizophrenia, depression and alcohol dependence.  
8 5 *Psychiatry Res* 2013;209(3):665-669.  
9  
10 6 35. Sikorski C, Luppá M, Brähler E, et al. Obese children, adults and senior citizens in the  
11 7 eyes of the general public: results of a representative study on stigma and causation of  
12 8 obesity. *PLoS One* 2012;7(10):e46924.doi:10.1371/journal.pone.0046924.  
13  
14 9 36. Bacon JG, Scheltema KE, Robinson BE. Fat phobia scale revisited: The short form. *Int*  
15 10 *J Obes* 2001;25(2):252-257.  
16  
17 11 37. Robinson BBE, Bacon JG, Reilly JO. Fat Phobia: Measuring, understanding, and  
18 12 changing Anti-Fat Attitudes. *Int J Eat Disord* 1993;14(4):467-480.  
19  
20 13 38. Stein J, Luppá M, Ruzanska U, et al. Measuring negative attitudes towards overweight  
21 14 and obesity in the German population-Psychometric properties and reference values for  
22 15 the German short version of the Fat Phobia Scale (FPS). *PLoS One* 2014;9(12):  
23 16 e114641.doi:10.1371/journal.pone.0114641.  
24  
25 17 39. Puhl RM, Luedicke J, Heuer C. Weight-based victimization toward overweight  
26 18 adolescents: Observations and reactions of peers. *J Sch Health* 2011;81(11):696-703.  
27  
28 19 40. Angermeyer MC, Holzinger A, Matschinger H. Emotional reactions to people with  
29 20 mental illness. *Epidemiol Psychiatr Sci* 2010;19(1):26-32.  
30  
31 21 41. Link BG, Cullen FT, Wozniak JF. The social rejection of former mental patients:  
32 22 understanding why labels matter. *Am J Sociol* 1987;92(6):1461-500.  
33  
34 23 42. Bogardus E. Measuring social distance. *J Appl Sociol* 1925;9:299-308.  
35  
36 24 43. IBM. SPSS Statistics for Windows. Armonk, NY: IBM Corp. 2013.  
37  
38 25 44. International Labour Office. International Standard Classification of Occupations:  
39 26 ISCO-08 [Internet]. [http://www.ilo.org/wcmsp5/groups/public/---dgreports/---dcomm/](http://www.ilo.org/wcmsp5/groups/public/---dgreports/---dcomm/---publ/documents/publication/wcms_172572.pdf)  
40 27 [--publ/documents/publication/wcms\\_172572.pdf](http://www.ilo.org/wcmsp5/groups/public/---dgreports/---dcomm/---publ/documents/publication/wcms_172572.pdf). Last accessed January 9, 2018.  
41  
42 28 45. Statistisches Jahrbuch 2016 [Internet].  
43 29 [https://www.destatis.de/DE/Publikationen/StatistischesJahrbuch/StatistischesJahrbuch2](https://www.destatis.de/DE/Publikationen/StatistischesJahrbuch/StatistischesJahrbuch2016.pdf?__blob=publicationFile)  
44 30 [016.pdf?\\_\\_blob=publicationFile](https://www.destatis.de/DE/Publikationen/StatistischesJahrbuch/StatistischesJahrbuch2016.pdf?__blob=publicationFile). Last accessed August 28, 2018.  
45  
46 31 46. Statistisches Bundesamt 2016. [Internet]  
47 32 [https://www.destatis.de/DE/ZahlenFakten/GesellschaftStaat/Bevoelkerung/Bevoelkeru](https://www.destatis.de/DE/ZahlenFakten/GesellschaftStaat/Bevoelkerung/Bevoelkerungsstand/Tabellen/Zensus_Geschlecht_Staatsangehoerigkeit.html)  
48 33 [ngsstand/Tabellen/Zensus\\_Geschlecht\\_Staatsangehoerigkeit.html](https://www.destatis.de/DE/ZahlenFakten/GesellschaftStaat/Bevoelkerung/Bevoelkerungsstand/Tabellen/Zensus_Geschlecht_Staatsangehoerigkeit.html). Last accessed  
49 34 August 28, 2018.  
50  
51 35 47. Crenshaw K. Demarginalizing the intersection of race and sex: a black feminist critique  
52 36 of antidiscrimination doctrine, feminist theory and antiracist politics. *Univ Chic Leg*  
53 37 *Forum* 1989;139:139-167.  
54  
55  
56 38  
57 39 48. Brennan MA, Lalonde CE, Bain JL. Body image perceptions: do gender differences  
58 40 exist? *Psy Chi J Undergrad Res* 2010;15(3):130-138.  
59  
60



- 1  
2  
3 1 49. Grossbard JR, Neighbors C, Larimer ME. Perceived norms for thinness and  
4 2 muscularity among college students: what do men and women really want? *Eat Behav*  
5 3 2011;12(3):192-199.  
6  
7 4 50. Boswell RG, White MA. Gender differences in weight bias internalisation and eating  
8 5 pathology in overweight individuals. *Adv Eat Disord* 2015;3(3):259-268.  
9  
10 6 51. Briggs SR, Cheek JM. The role of factor analysis in the development and evaluation of  
11 7 personality scales. *J Pers* 1986;54(1):106-148.  
12  
13  
14  
15  
16  
17  
18  
19  
20  
21  
22  
23  
24  
25  
26  
27  
28  
29  
30  
31  
32  
33  
34  
35  
36  
37  
38  
39  
40  
41  
42  
43  
44  
45  
46  
47  
48  
49  
50  
51  
52  
53  
54  
55  
56  
57  
58  
59  
60

For peer review only

## APPENDIX

### Female vignettes

Diana D. is *a lawyer* and 46 years old. With a height of 5'5 and a weight of 200 pounds, she is severely overweight.

Diana D. is *a cleaner* and 46 years old. With a height of 5'5 and a weight of 200 pounds, she is severely overweight.

### Male vignettes

John D. is *a lawyer* and 46 years old. With a height of 5'9 and a weight of 230 pounds, he is severely overweight.

John D. is *a janitor* and 46 years old. With a height of 5'9 and a weight of 230 pounds, he is severely overweight.

1  
2  
3  
4  
5  
6  
7  
8  
9  
10  
11  
12  
13  
14  
15  
16  
17  
18  
19  
20  
21  
22  
23  
24  
25  
26  
27  
28  
29  
30  
31  
32  
33  
34  
35  
36  
37  
38  
39  
40  
41  
42  
43  
44  
45  
46  
47  
48  
49  
50  
51  
52  
53  
54  
55  
56  
57  
58  
59  
60STROBE Statement—Checklist of items that should be included in reports of *cross-sectional studies*

|                           | Item No | Recommendation                                                                                                                                                                                    | Page                                     |
|---------------------------|---------|---------------------------------------------------------------------------------------------------------------------------------------------------------------------------------------------------|------------------------------------------|
| <b>Title and abstract</b> | 1       | (a) Indicate the study's design with a commonly used term in the title or the abstract                                                                                                            | 2                                        |
|                           |         | (b) Provide in the abstract an informative and balanced summary of what was done and what was found                                                                                               | 2                                        |
| <b>Introduction</b>       |         |                                                                                                                                                                                                   |                                          |
| Background/rationale      | 2       | Explain the scientific background and rationale for the investigation being reported                                                                                                              | 5                                        |
| Objectives                | 3       | State specific objectives, including any prespecified hypotheses                                                                                                                                  | 5                                        |
| <b>Methods</b>            |         |                                                                                                                                                                                                   |                                          |
| Study design              | 4       | Present key elements of study design early in the paper                                                                                                                                           | 6,7                                      |
| Setting                   | 5       | Describe the setting, locations, and relevant dates, including periods of recruitment, exposure, follow-up, and data collection                                                                   | 6                                        |
| Participants              | 6       | (a) Give the eligibility criteria, and the sources and methods of selection of participants                                                                                                       | 6                                        |
| Variables                 | 7       | Clearly define all outcomes, exposures, predictors, potential confounders, and effect modifiers. Give diagnostic criteria, if applicable                                                          | 7,8                                      |
| Data sources/ measurement | 8*      | For each variable of interest, give sources of data and details of methods of assessment (measurement). Describe comparability of assessment methods if there is more than one group              | 7,8                                      |
| Bias                      | 9       | Describe any efforts to address potential sources of bias                                                                                                                                         | 6,8                                      |
| Study size                | 10      | Explain how the study size was arrived at                                                                                                                                                         | 6                                        |
| Quantitative variables    | 11      | Explain how quantitative variables were handled in the analyses. If applicable, describe which groupings were chosen and why                                                                      | 7,8                                      |
| Statistical methods       | 12      | (a) Describe all statistical methods, including those used to control for confounding                                                                                                             | 8                                        |
|                           |         | (b) Describe any methods used to examine subgroups and interactions                                                                                                                               | 8                                        |
|                           |         | (c) Explain how missing data were addressed                                                                                                                                                       | 8                                        |
|                           |         | (d) If applicable, describe analytical methods taking account of sampling strategy                                                                                                                | -                                        |
|                           |         | (e) Describe any sensitivity analyses                                                                                                                                                             | -                                        |
| <b>Results</b>            |         |                                                                                                                                                                                                   |                                          |
| Participants              | 13*     | (a) Report numbers of individuals at each stage of study—eg numbers potentially eligible, examined for eligibility, confirmed eligible, included in the study, completing follow-up, and analysed | 6,9                                      |
|                           |         | (b) Give reasons for non-participation at each stage                                                                                                                                              | 6                                        |
|                           |         | (c) Consider use of a flow diagram                                                                                                                                                                | -                                        |
| Descriptive data          | 14*     | (a) Give characteristics of study participants (eg demographic, clinical, social) and information on exposures and potential confounders                                                          | Table 1                                  |
|                           |         | (b) Indicate number of participants with missing data for each variable of interest                                                                                                               | Table 2<br>Table 3<br>Table 4<br>Table 5 |

|                          |     |                                                                                                                                                                                                              |                                          |
|--------------------------|-----|--------------------------------------------------------------------------------------------------------------------------------------------------------------------------------------------------------------|------------------------------------------|
| Outcome data             | 15* | Report numbers of outcome events or summary measures                                                                                                                                                         | Table 2<br>Table 3<br>Table 4<br>Table 5 |
| Main results             | 16  | (a) Give unadjusted estimates and, if applicable, confounder-adjusted estimates and their precision (eg, 95% confidence interval). Make clear which confounders were adjusted for and why they were included | Table 2<br>Table 3<br>Table 4<br>Table 5 |
|                          |     | (b) Report category boundaries when continuous variables were categorized                                                                                                                                    | -                                        |
|                          |     | (c) If relevant, consider translating estimates of relative risk into absolute risk for a meaningful time period                                                                                             | -                                        |
| Other analyses           | 17  | Report other analyses done—eg analyses of subgroups and interactions, and sensitivity analyses                                                                                                               | 15,16                                    |
| <b>Discussion</b>        |     |                                                                                                                                                                                                              |                                          |
| Key results              | 18  | Summarise key results with reference to study objectives                                                                                                                                                     | 15,16                                    |
| Limitations              | 19  | Discuss limitations of the study, taking into account sources of potential bias or imprecision. Discuss both direction and magnitude of any potential bias                                                   | 16,17                                    |
| Interpretation           | 20  | Give a cautious overall interpretation of results considering objectives, limitations, multiplicity of analyses, results from similar studies, and other relevant evidence                                   | 16,17                                    |
| Generalisability         | 21  | Discuss the generalisability (external validity) of the study results                                                                                                                                        | 17                                       |
| <b>Other information</b> |     |                                                                                                                                                                                                              |                                          |
| Funding                  | 22  | Give the source of funding and the role of the funders for the present study and, if applicable, for the original study on which the present article is based                                                | 18                                       |

\*Give information separately for exposed and unexposed groups.

**Note:** An Explanation and Elaboration article discusses each checklist item and gives methodological background and published examples of transparent reporting. The STROBE checklist is best used in conjunction with this article (freely available on the Web sites of PLoS Medicine at <http://www.plosmedicine.org/>, Annals of Internal Medicine at <http://www.annals.org/>, and Epidemiology at <http://www.epidem.com/>). Information on the STROBE Initiative is available at [www.strobe-statement.org](http://www.strobe-statement.org).
