# Supplementary material for: Social deprivation, gender and obesity: multiple stigma? Results of a population survey from Germany
Source: PubMed Central journal article supplement — BMJ Open. 2019 Apr 3;9(4):e023389. doi: 10.1136/bmjopen-2018-023389 (PMC6500240; doi:10.1136/bmjopen-2018-023389), 2019-04-03
Supplement: bmjopen-2018-023389supp001.pdf [file bmjopen-2018-023389supp001.pdf]

## **APPENDIX**

### **Female vignettes**

Diana D. is *a lawyer* and 46 years old. With a height of 5'5 and a weight of 200 pounds, she is severely overweight.

Diana D. is *a cleaner* and 46 years old. With a height of 5'5 and a weight of 200 pounds, she is severely overweight.

### **Male vignettes**

John D. is *a lawyer* and 46 years old. With a height of 5'9 and a weight of 230 pounds, he is severely overweight.

John D. is *a janitor* and 46 years old. With a height of 5'9 and a weight of 230 pounds, he is severely overweight.
